# Supplementary material for: Remote electronic effect on the N-heterocyclic carbene-catalyzed asymmetric intramolecular Stetter reaction and structural revision of products
Source: Royal Society of Chemistry journal article supplement (doi:10.1039/d3cc00693j), 2023-01-01
Supplement: d3cc00693j1.pdf [file d3cc00693j1.pdf]

# Remote Electronic Effect on the N-Heterocyclic Carbene-catalyzed Asymmetric Intramolecular Stetter Reaction and Structural Revision of Products

*Tsubasa Inokuma,<sup>a,b</sup> Kohei Iritani,<sup>a</sup> Yuki Takahara,<sup>a</sup> Chunzhao Sun,<sup>a</sup> Yousuke Yamaoka,<sup>c</sup> Satoru Kuwano,<sup>c</sup>  
and Ken-ichi Yamada<sup>\*,a,b</sup>*

<sup>a</sup>Graduate School of Pharmaceutical Sciences, Tokushima University, Shomachi, Tokushima 770-8505, Japan.

<sup>b</sup>Research Cluster on “Key Material Development”, Tokushima University, Shomachi, Tokushima 770-8505, Japan.

<sup>c</sup>Graduate School of Pharmaceutical Sciences, Kyoto University, Yoshida, Sakyo-ku, Kyoto 606-8501, Japan.

yamak@tokushima-u.ac.jp

## Contents

|                                                                  |        |
|------------------------------------------------------------------|--------|
| 1. Copies of <sup>1</sup> H and <sup>13</sup> C NMR spectra..... | S2–28  |
| 2. Copies of HPLC charts.....                                    | S29–37 |

# Supporting Information II

## 1. Copies of $^1\text{H}$ and $^{13}\text{C}$ NMR spectra

### $^1\text{H}$ NMR of S2

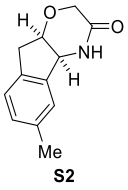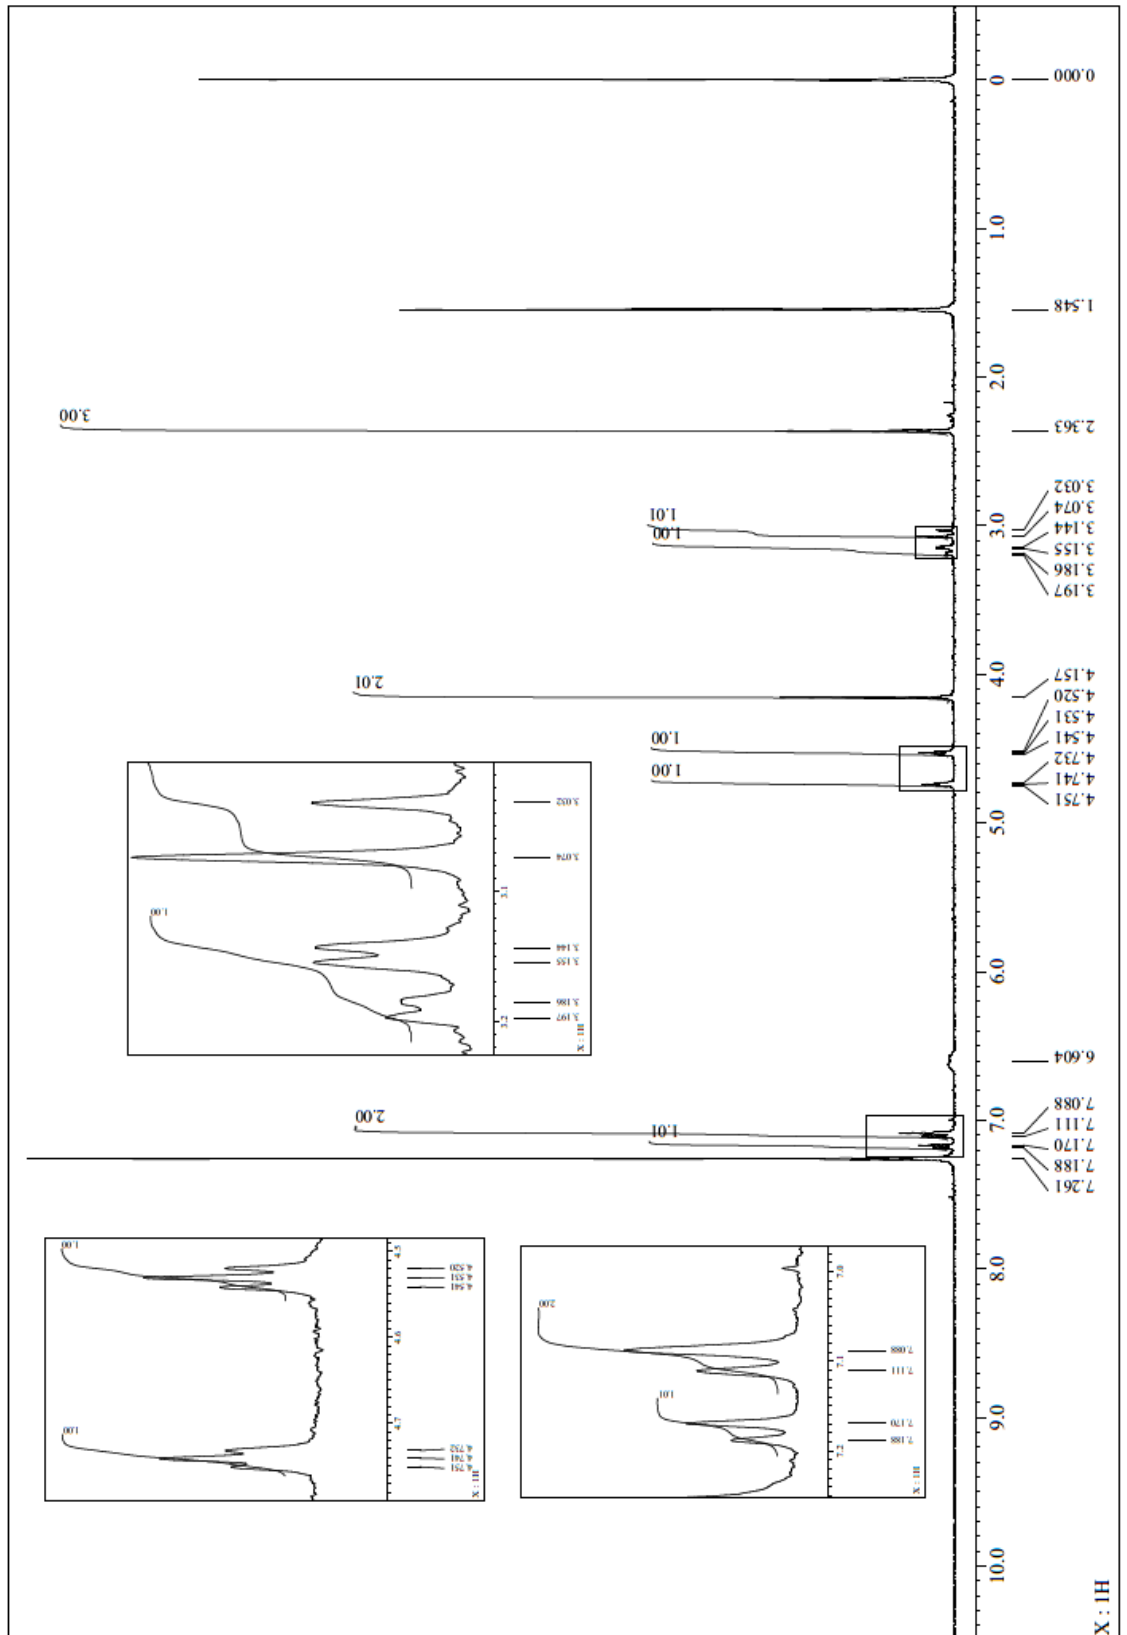

# Supporting Information II

## $^{13}\text{C}$ NMR of S2

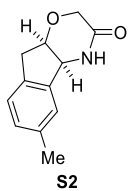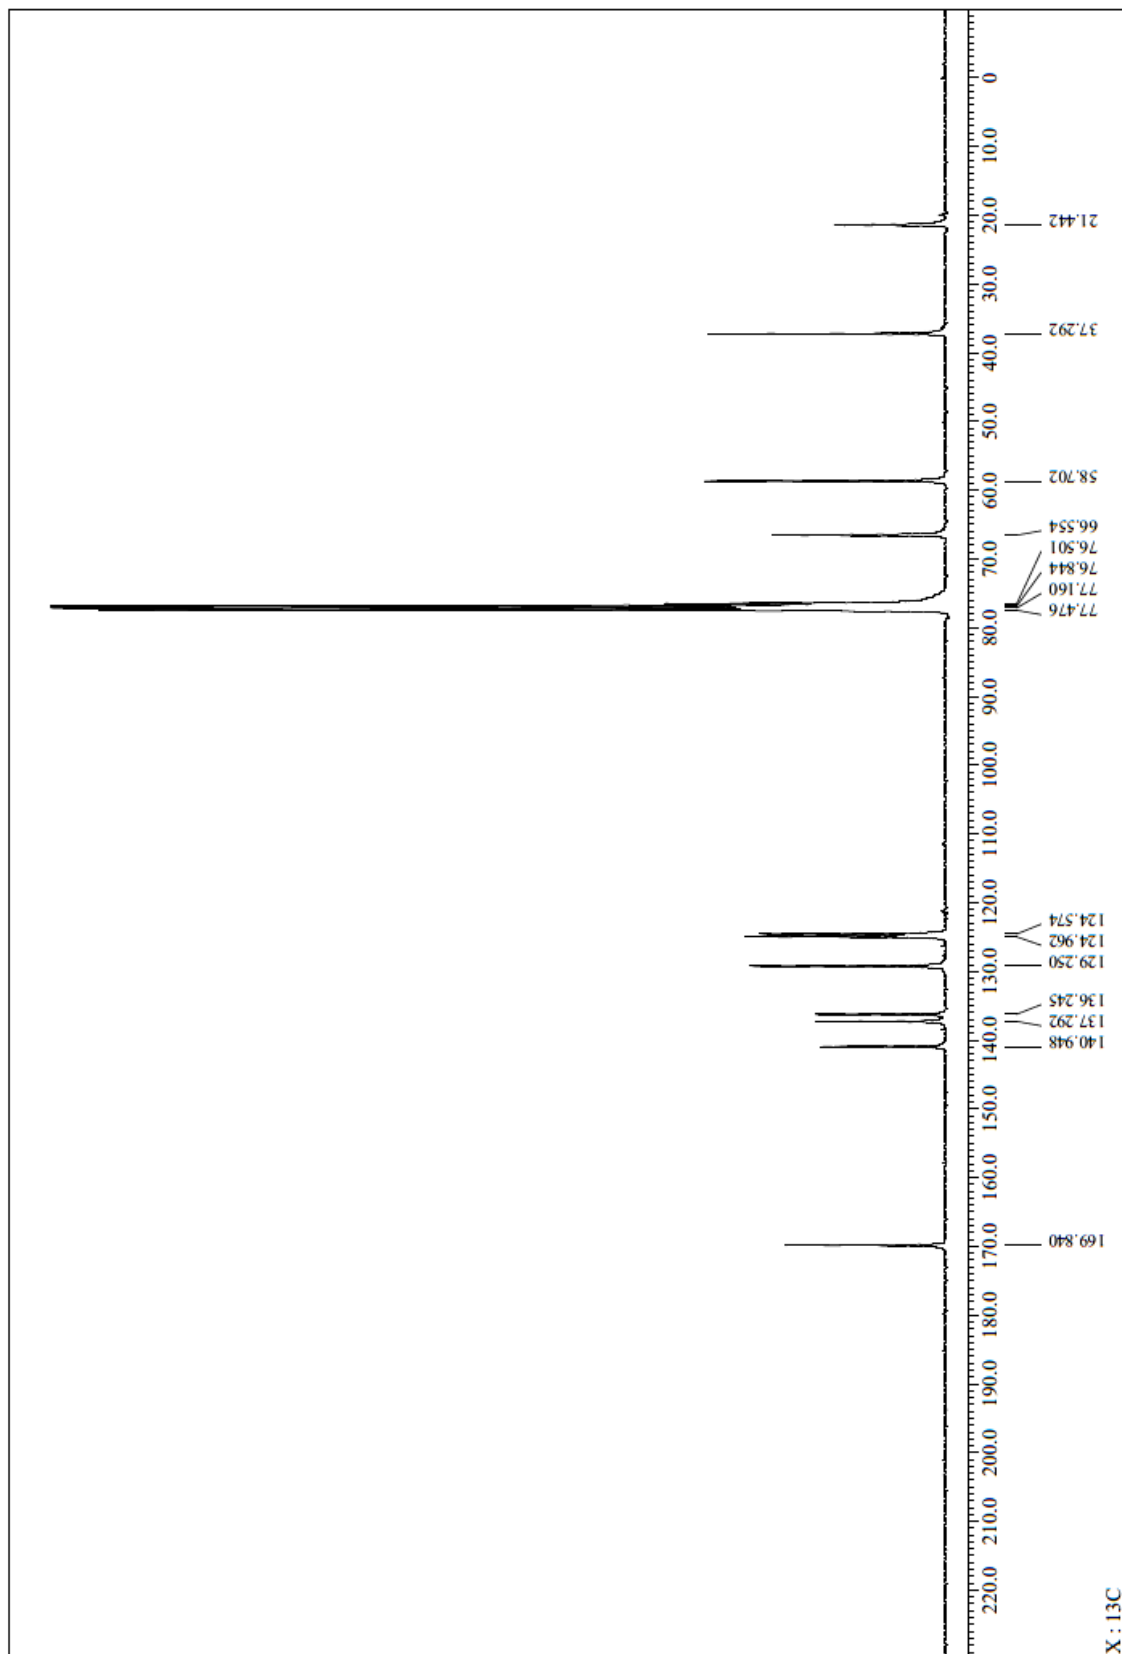

# Supporting Information II

## <sup>1</sup>H NMR of *ent-1c*

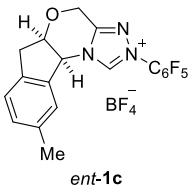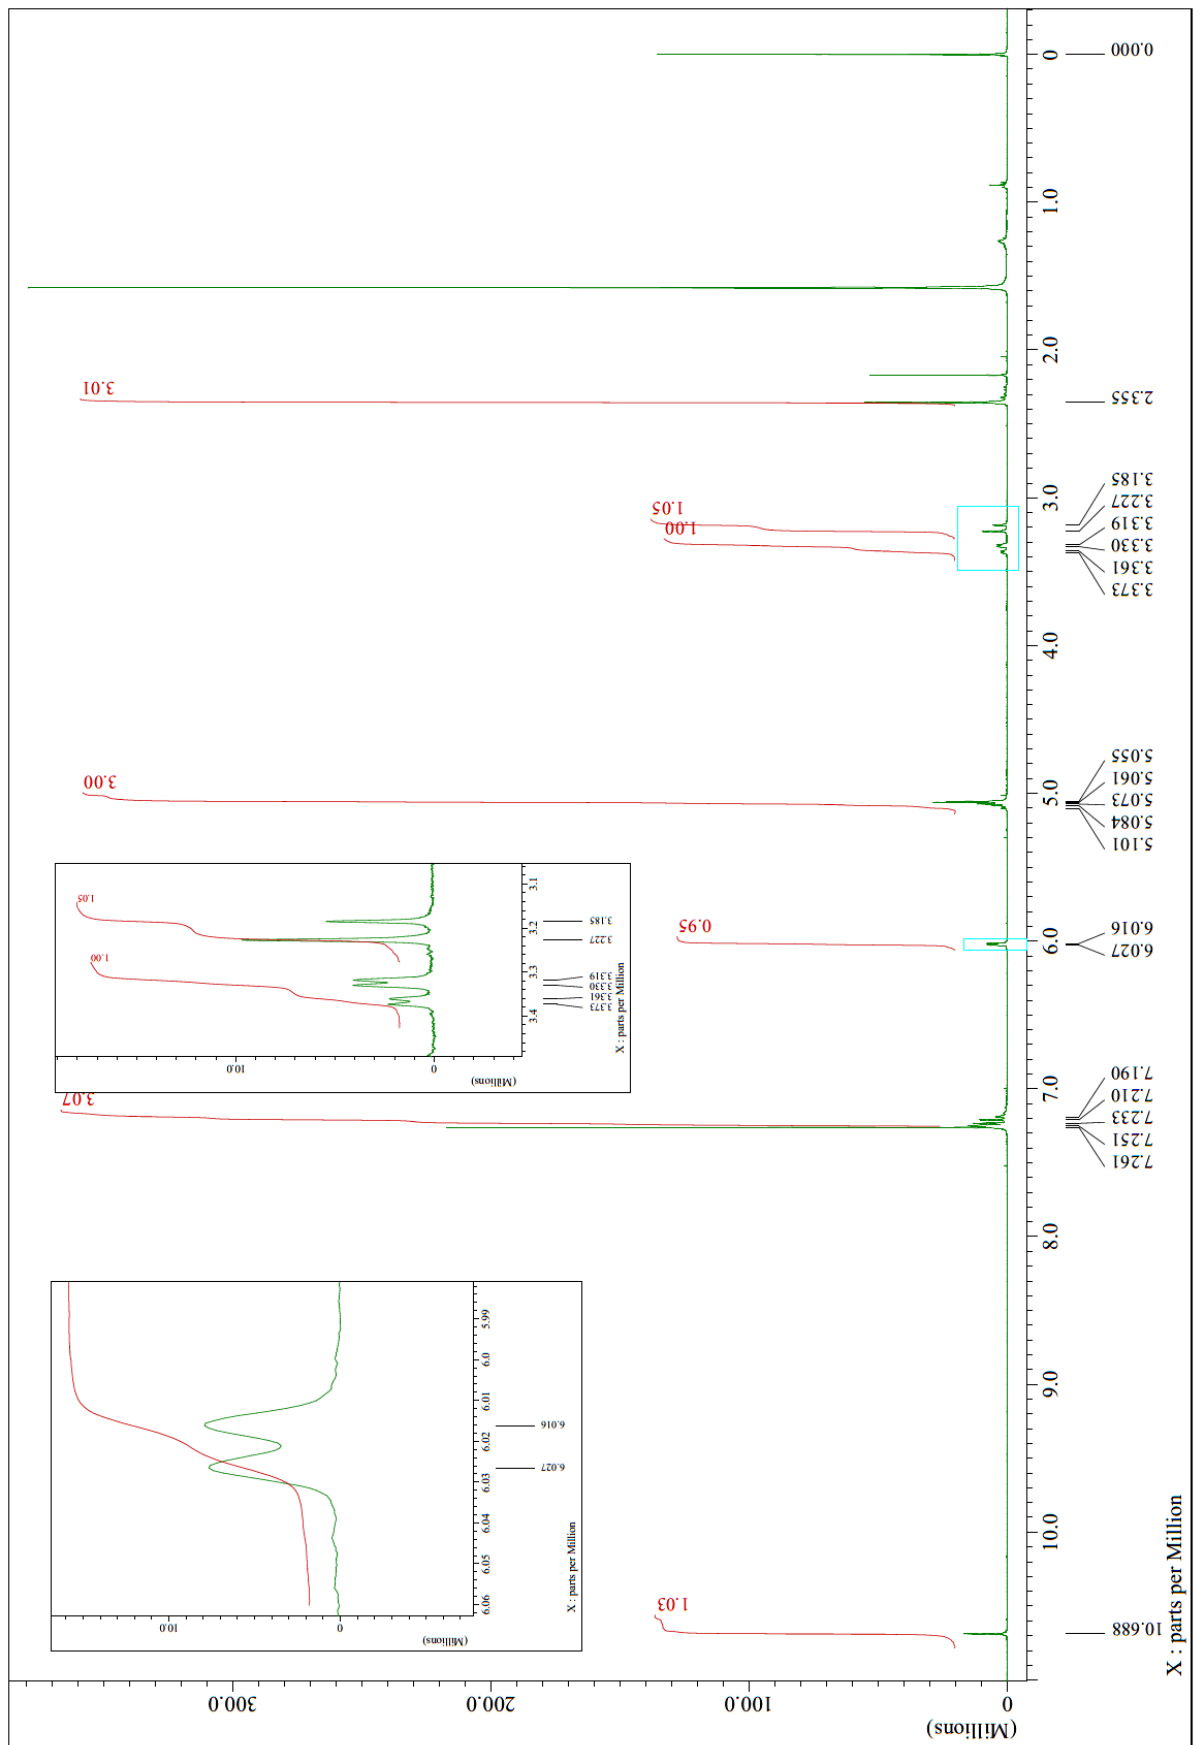

## Supporting Information II

### $^{13}\text{C}$ NMR of *ent-1c*

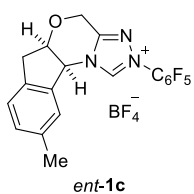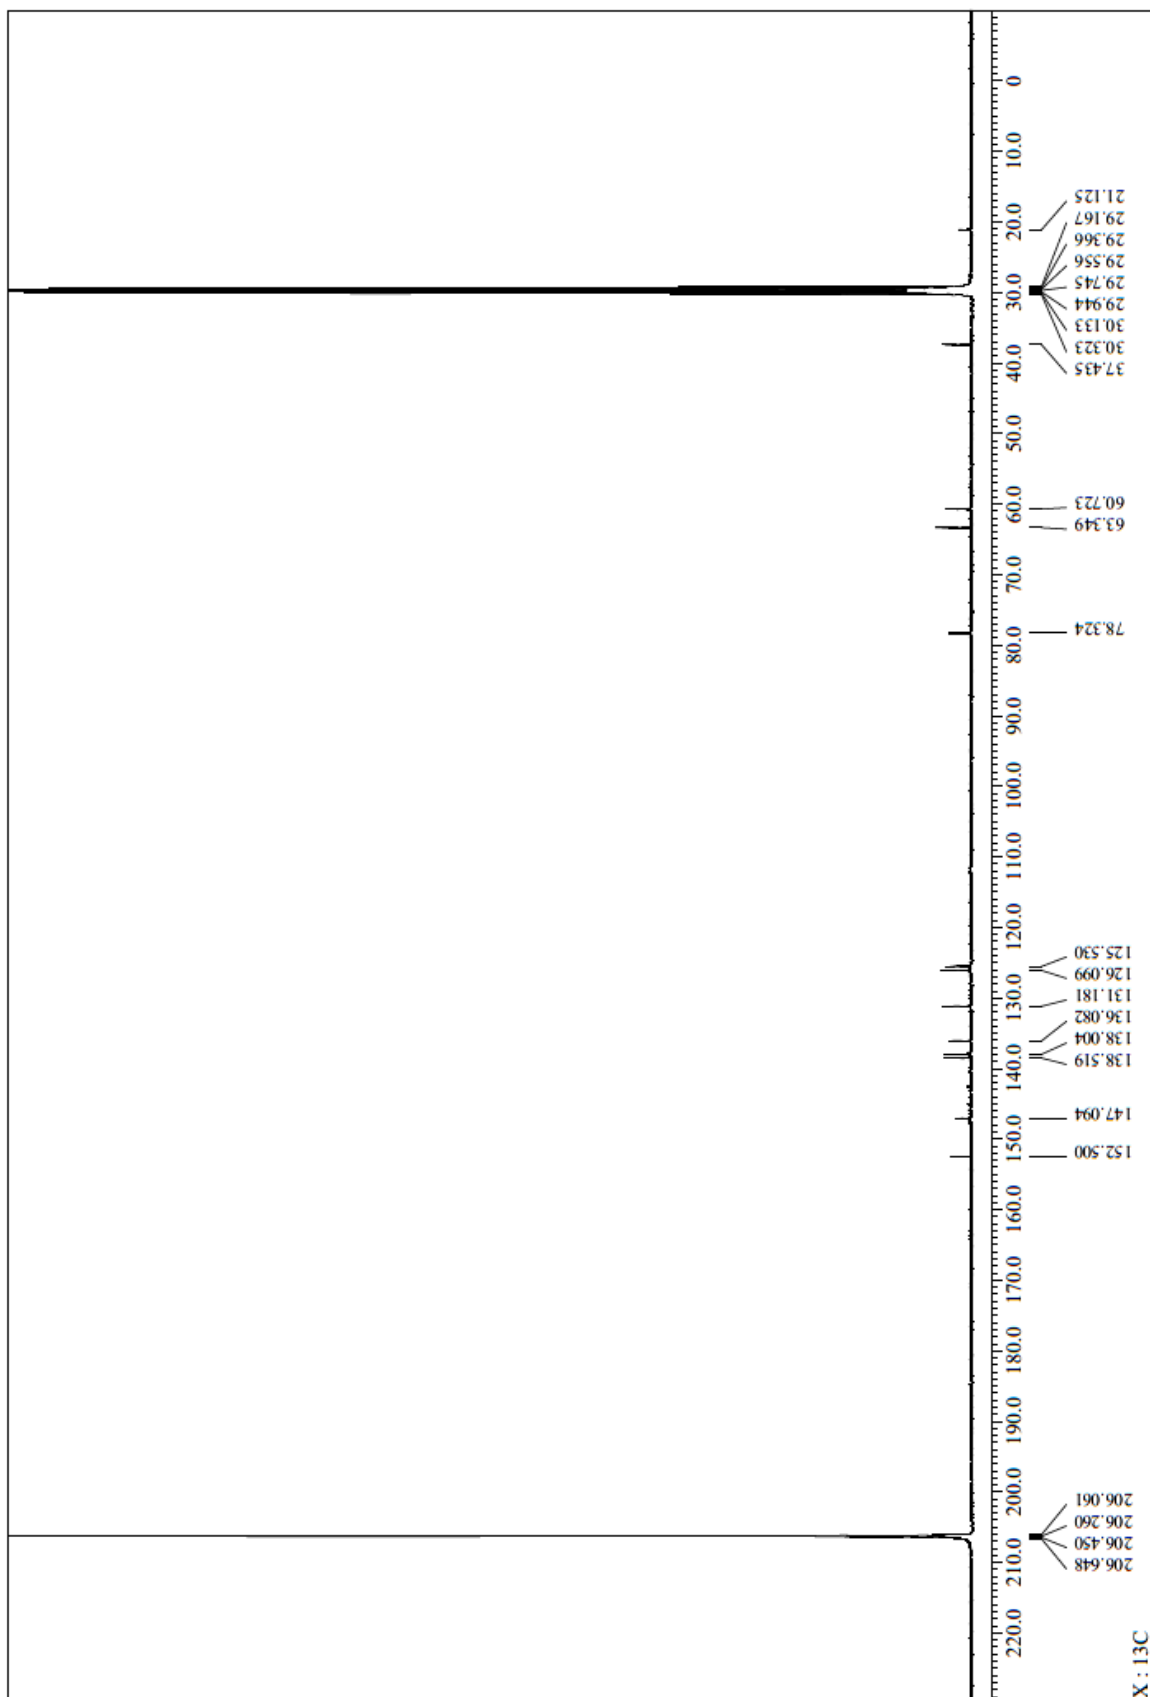

# Supporting Information II

## <sup>1</sup>H NMR of S4

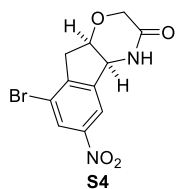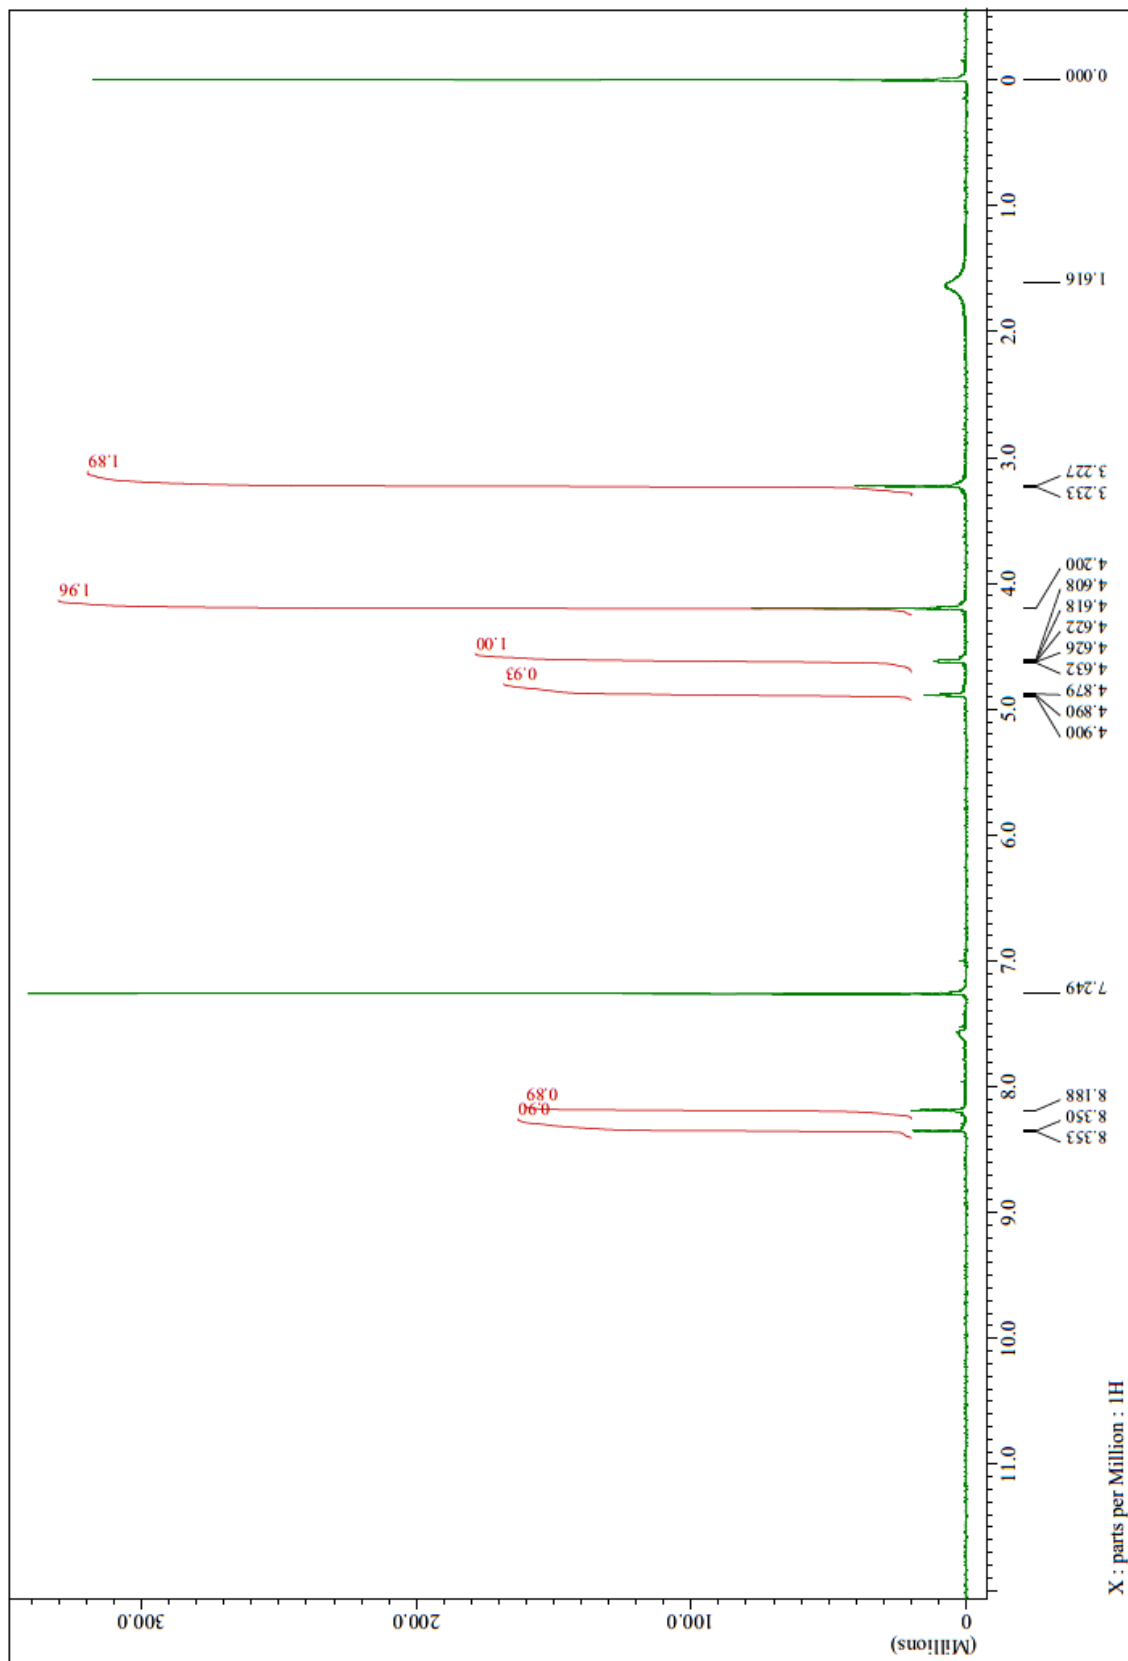

# Supporting Information II

## $^{13}\text{C}$ NMR of S4

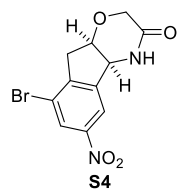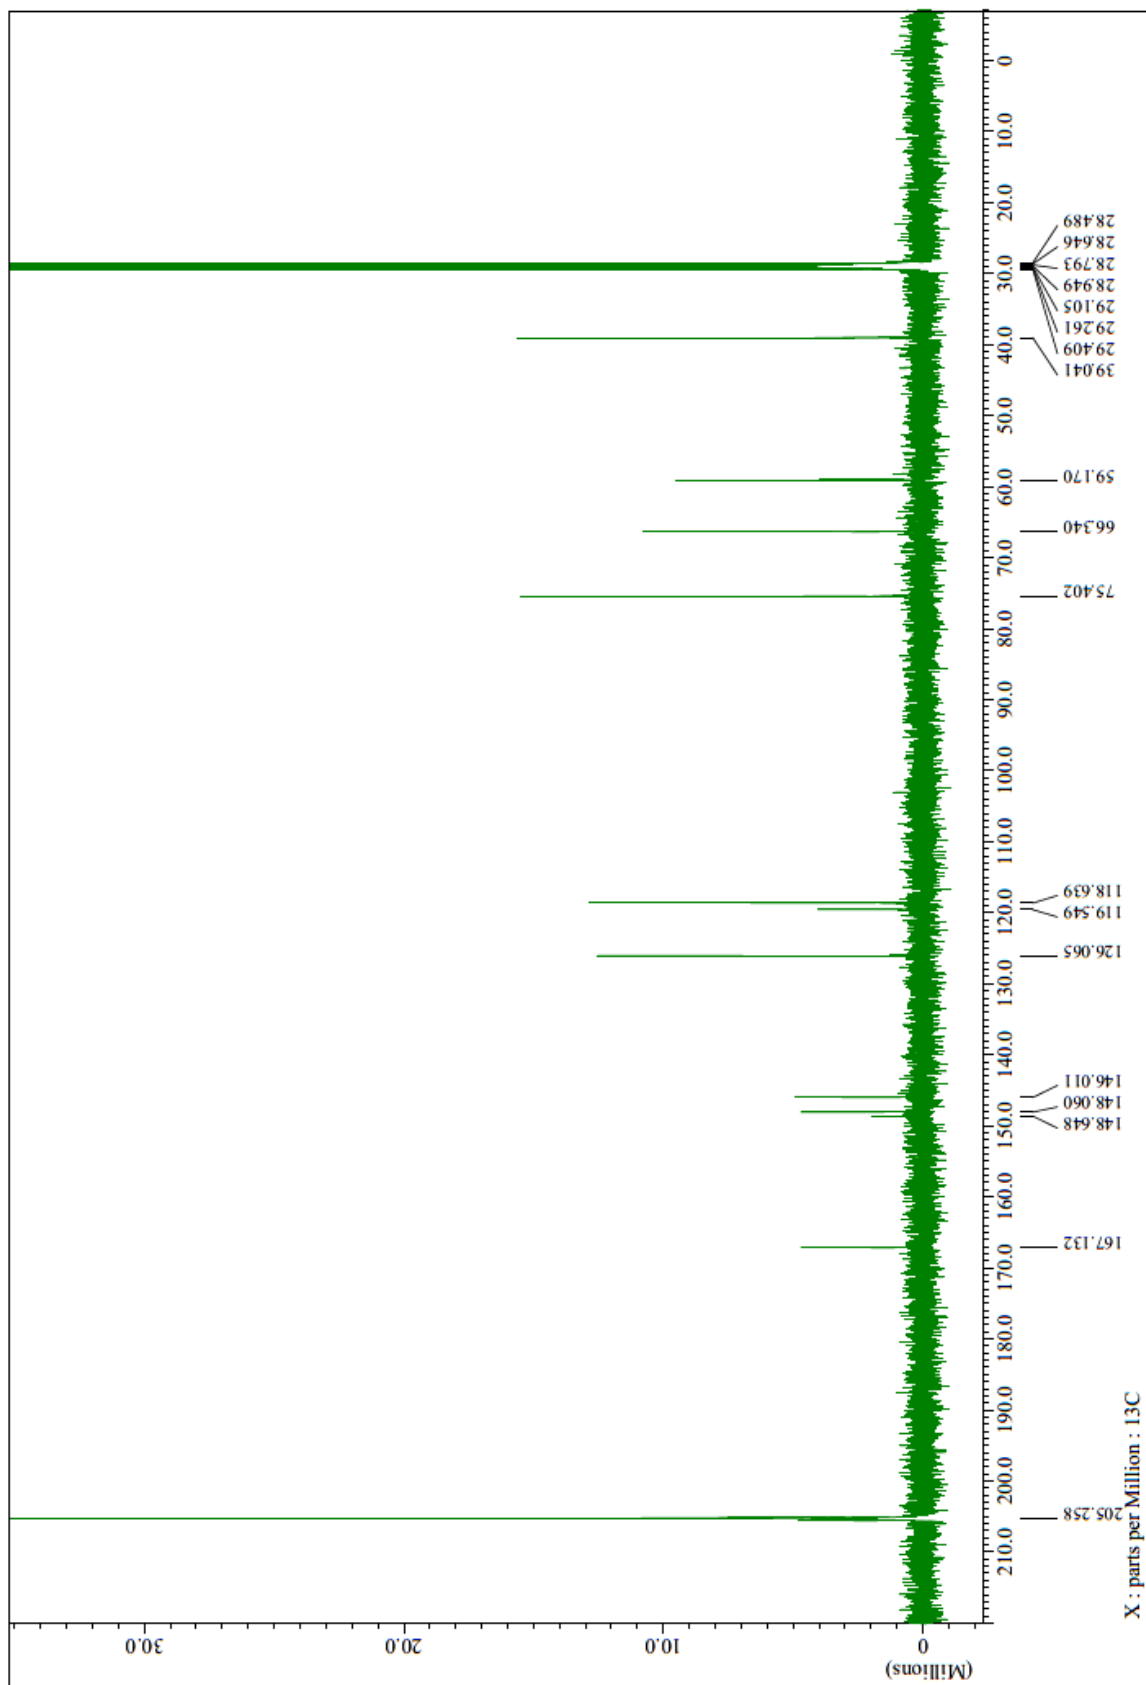

# Supporting Information II

## <sup>1</sup>H NMR of *ent-1e*

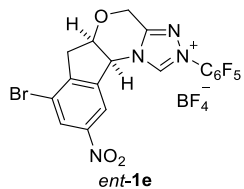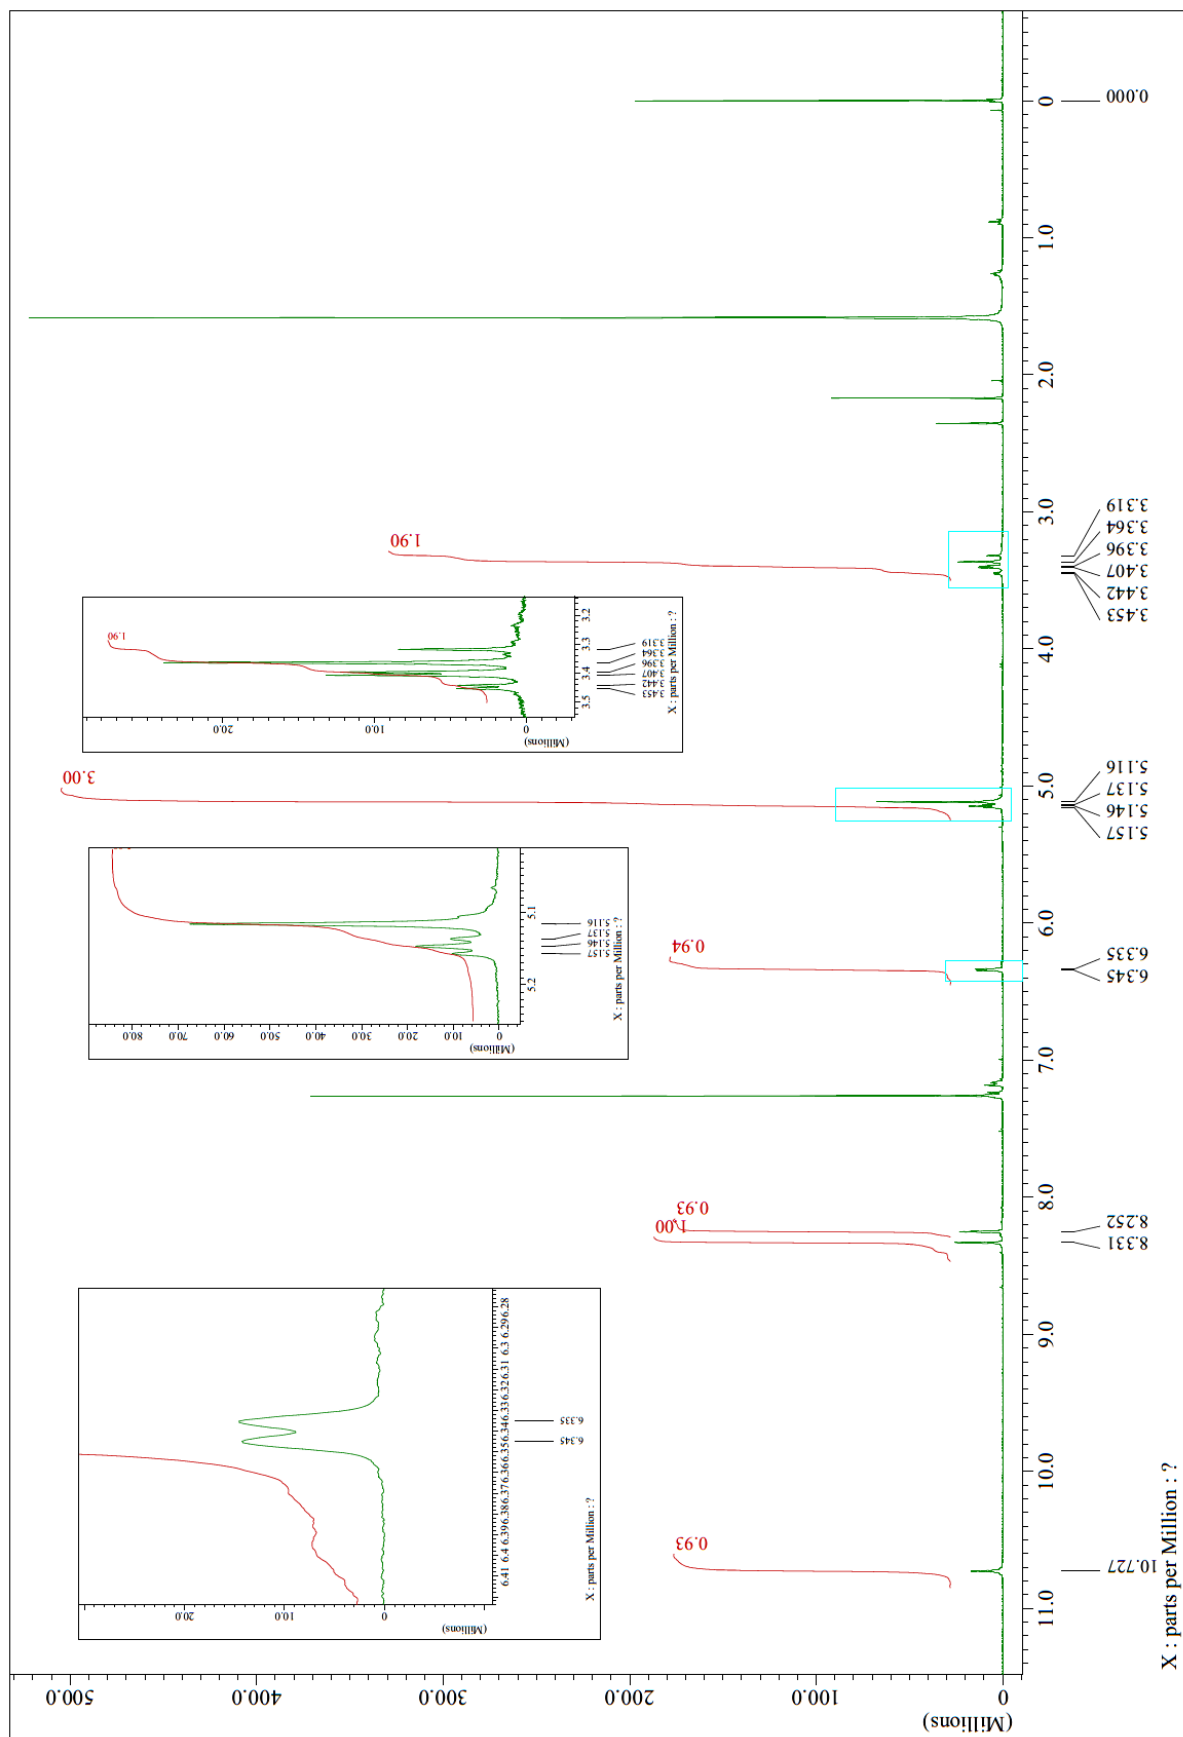



# Supporting Information II

## $^{13}\text{C}$ NMR of *ent-1e*

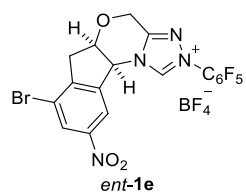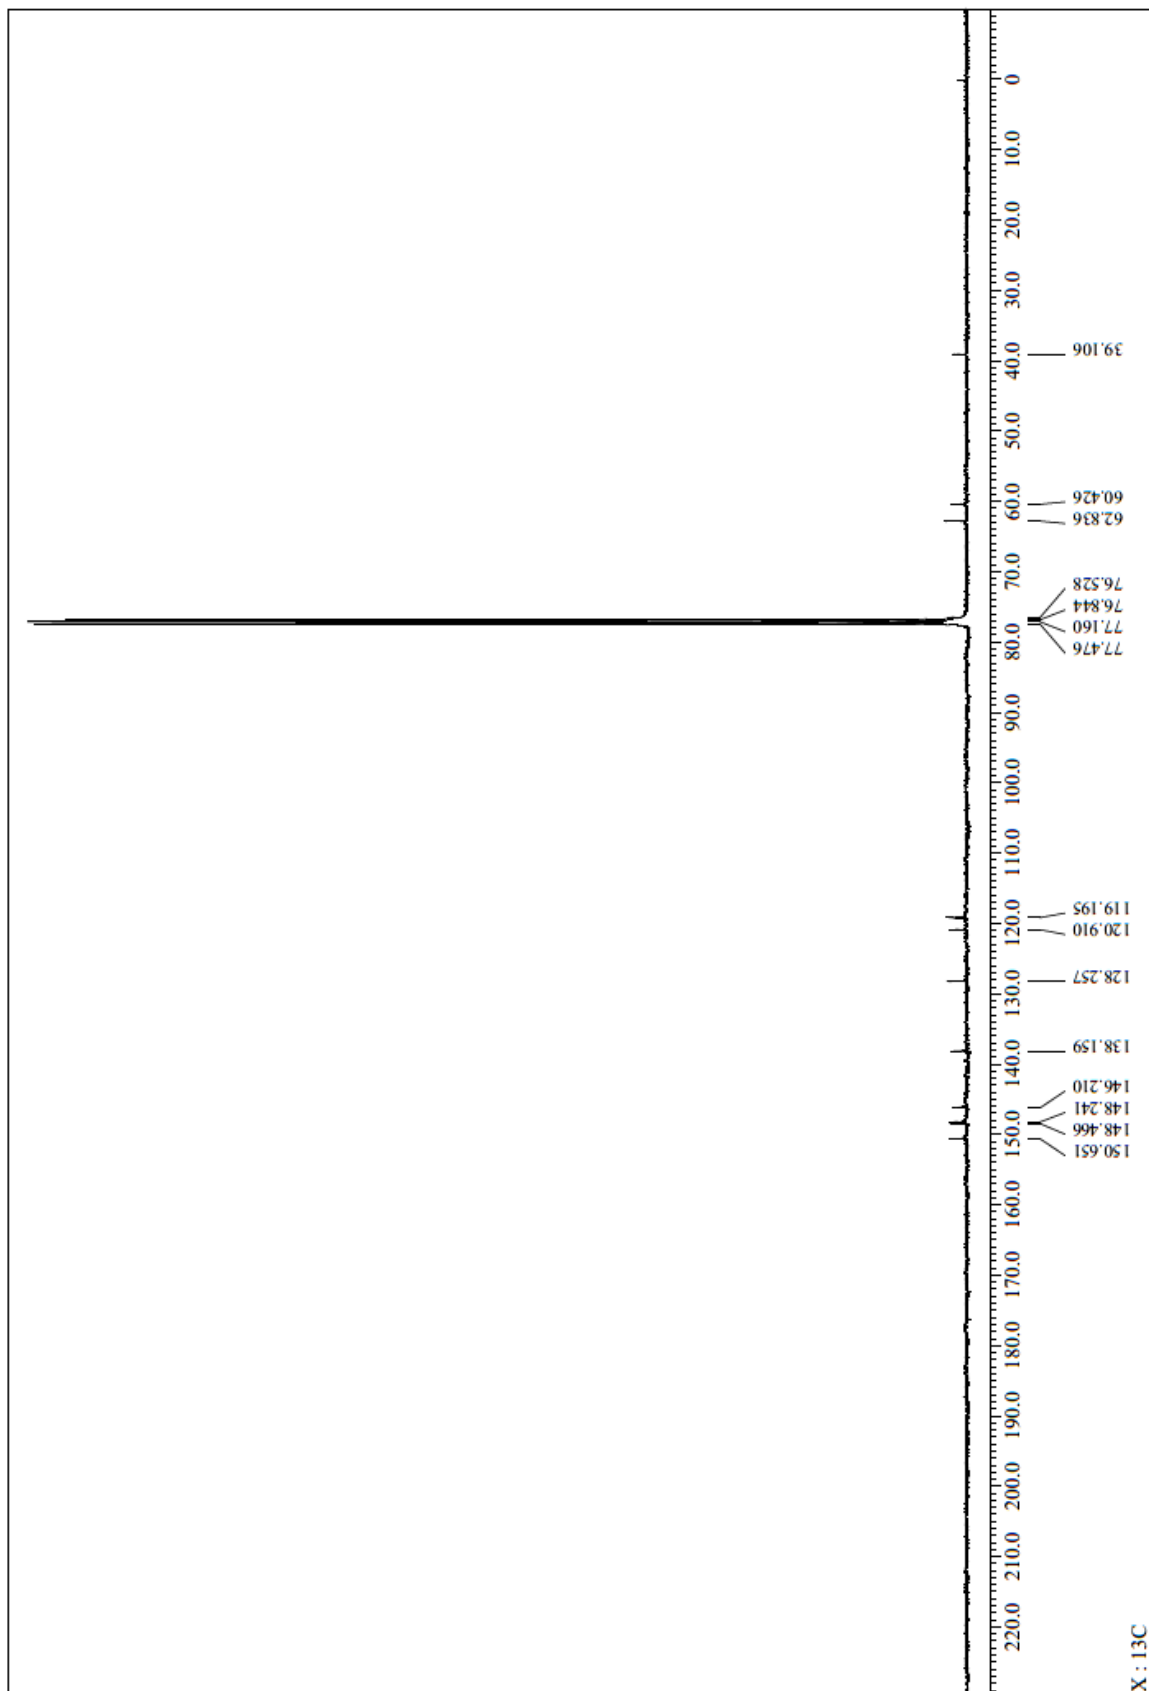

X: 13C

# Supporting Information II

## $^1\text{H}$ NMR of S6

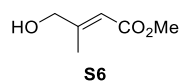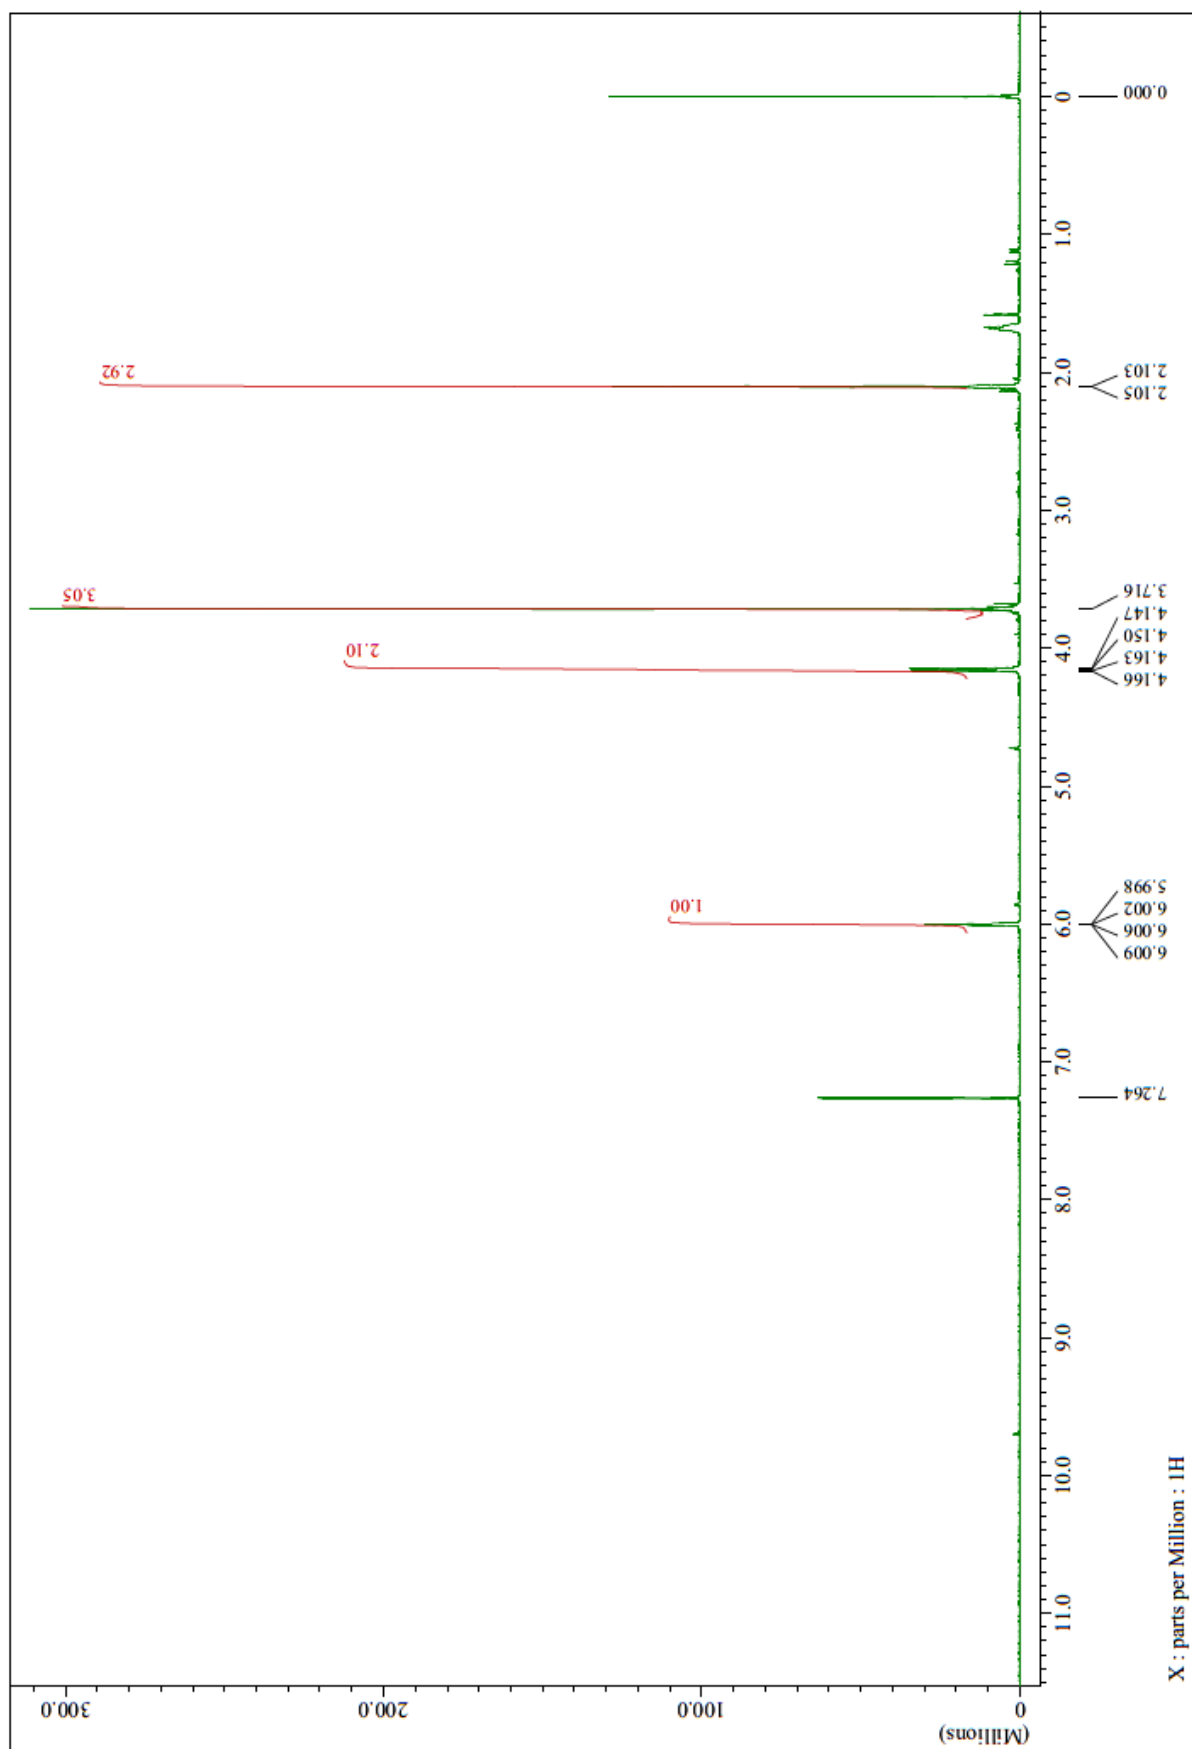

# Supporting Information II

## $^{13}\text{C}$ NMR of S6

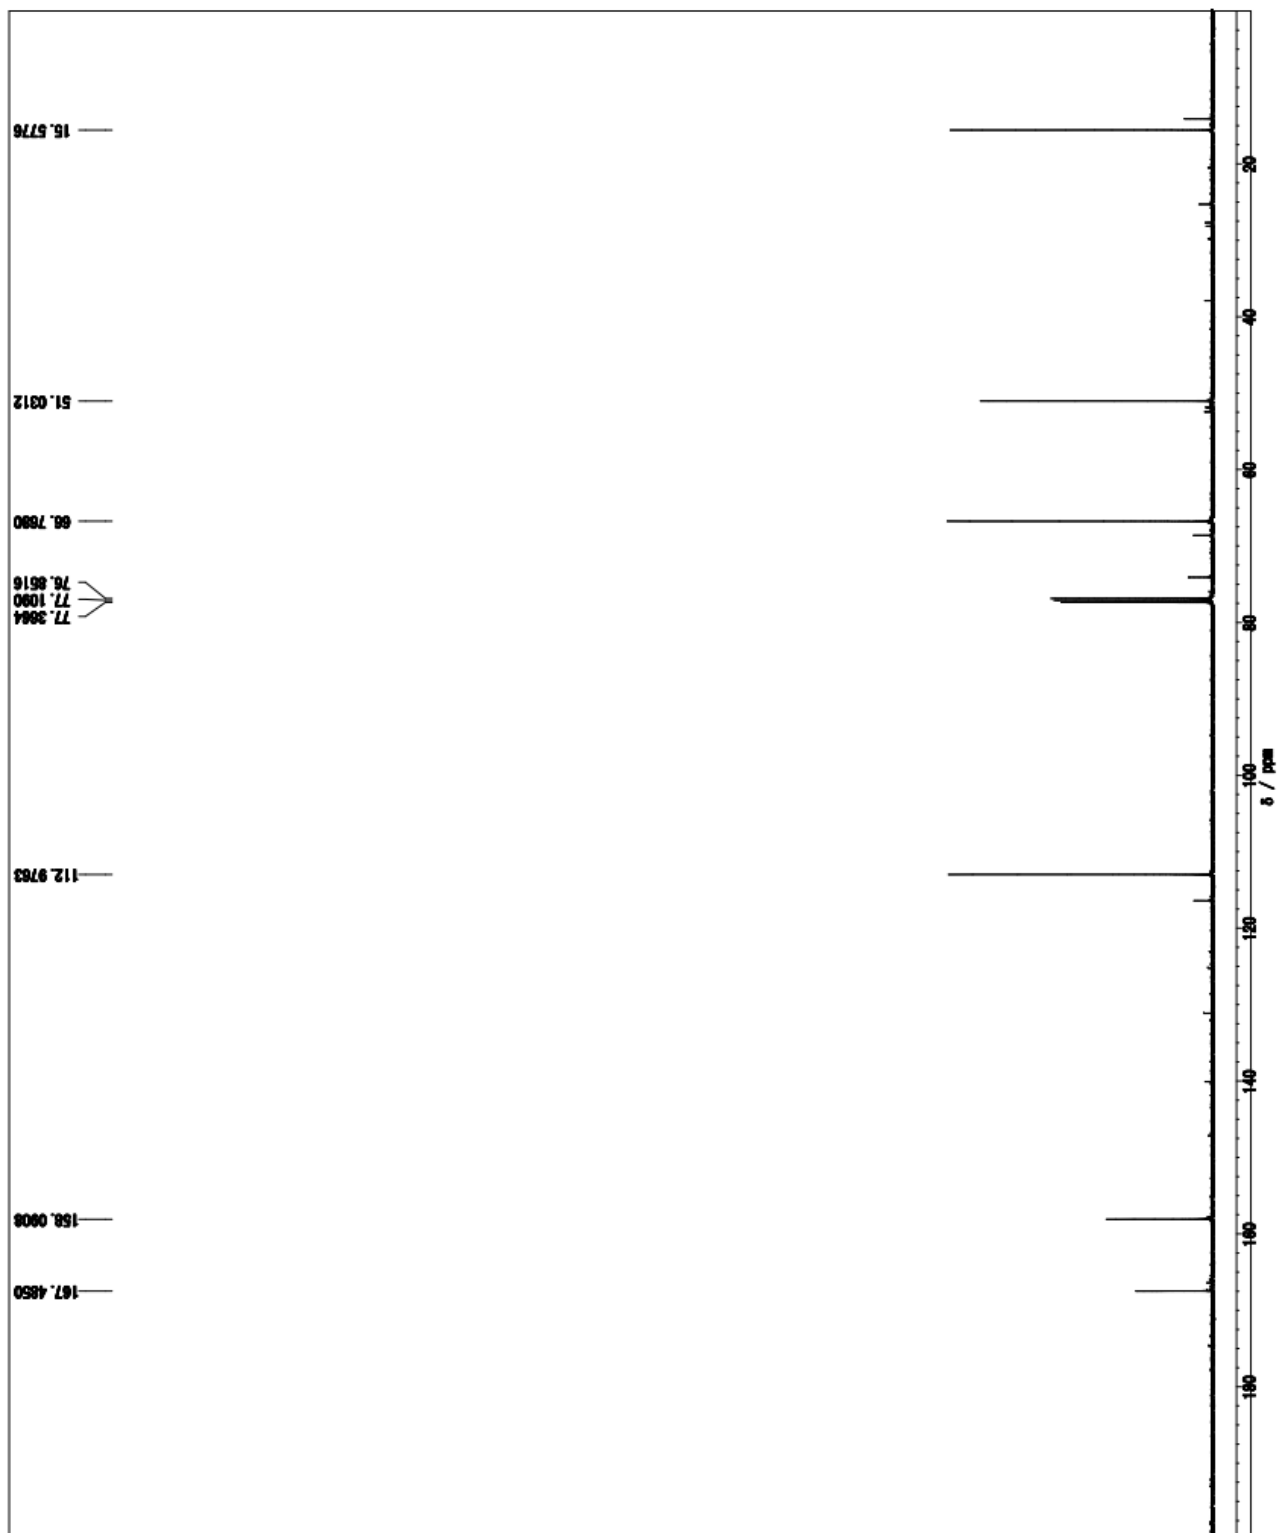

# Supporting Information II

## $^1\text{H}$ NMR of S7

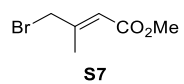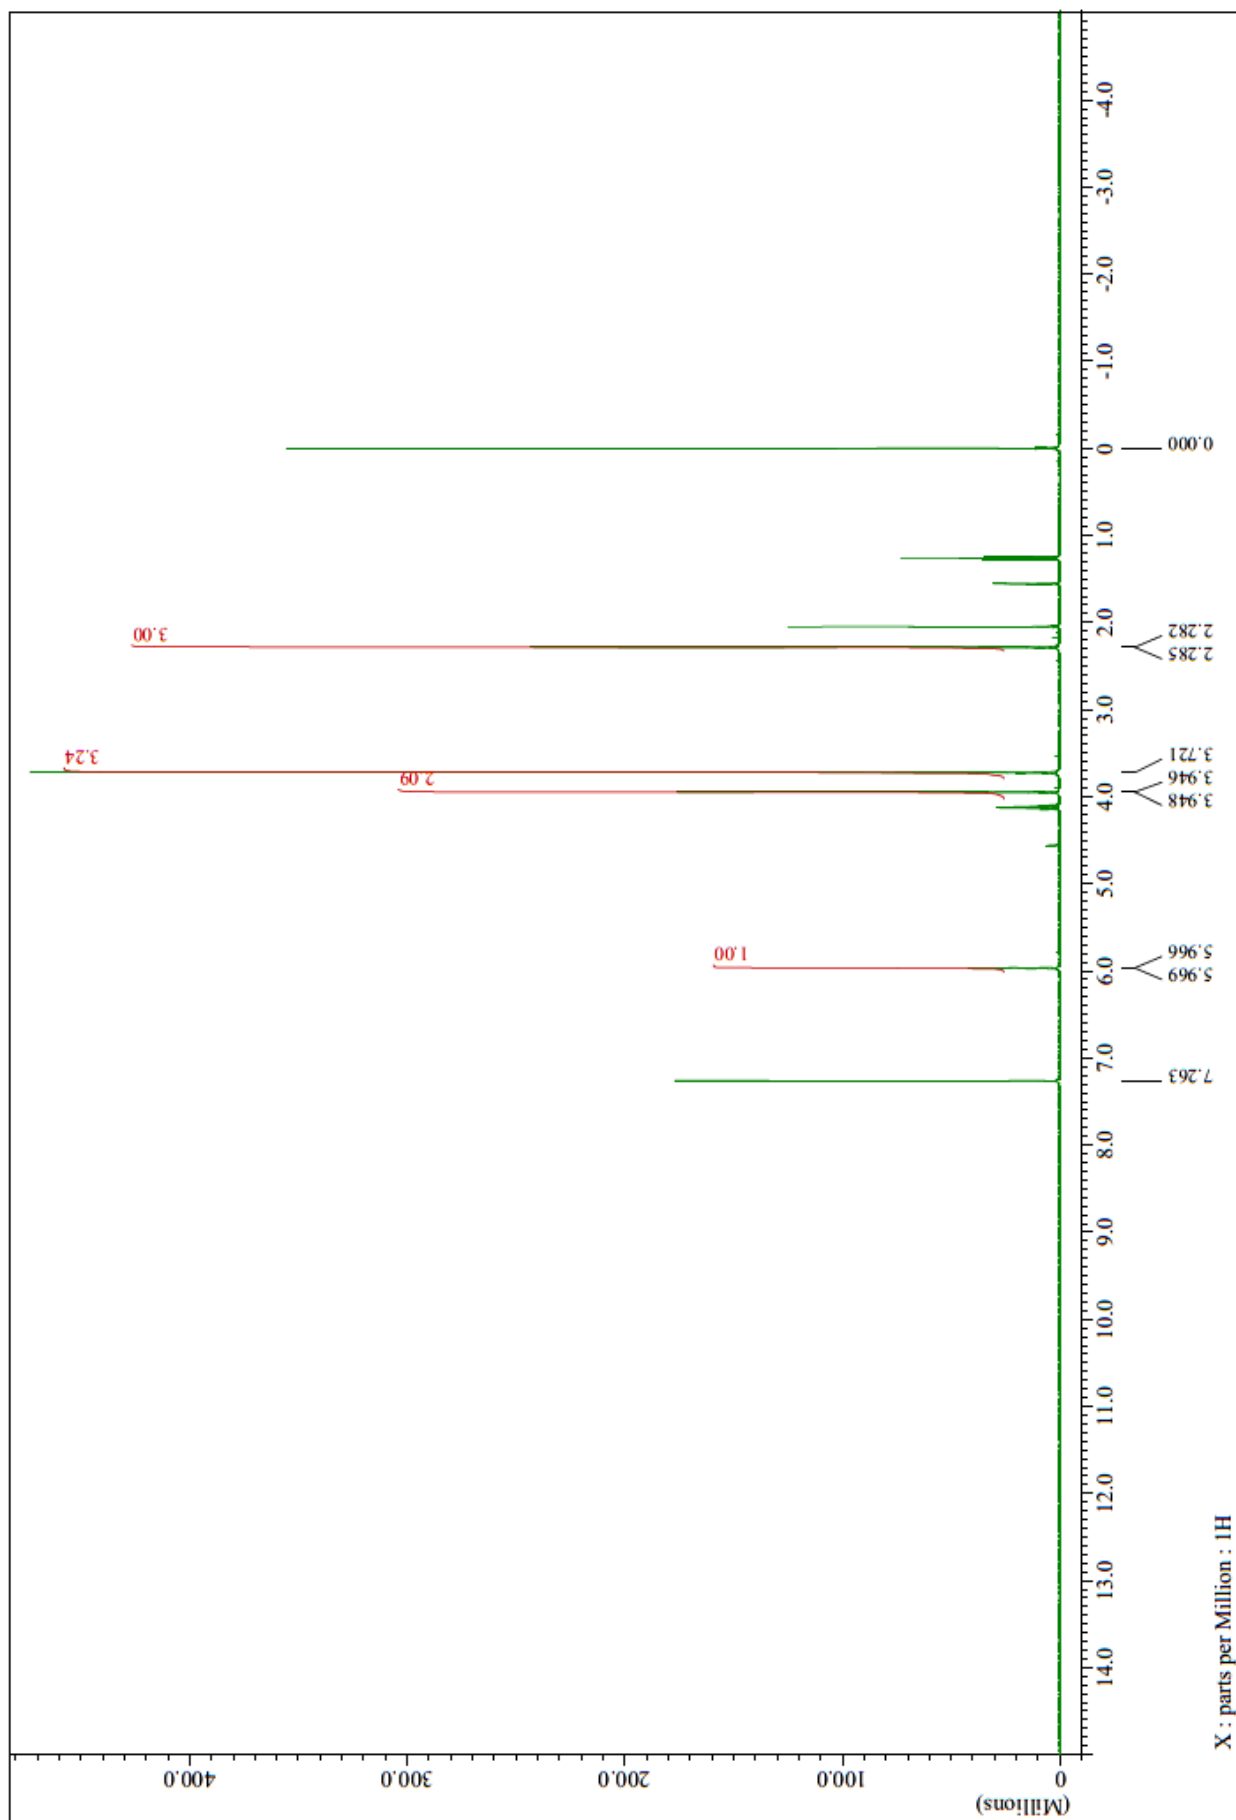

# Supporting Information II

$^{13}\text{C}$  NMR of S7

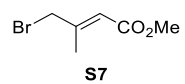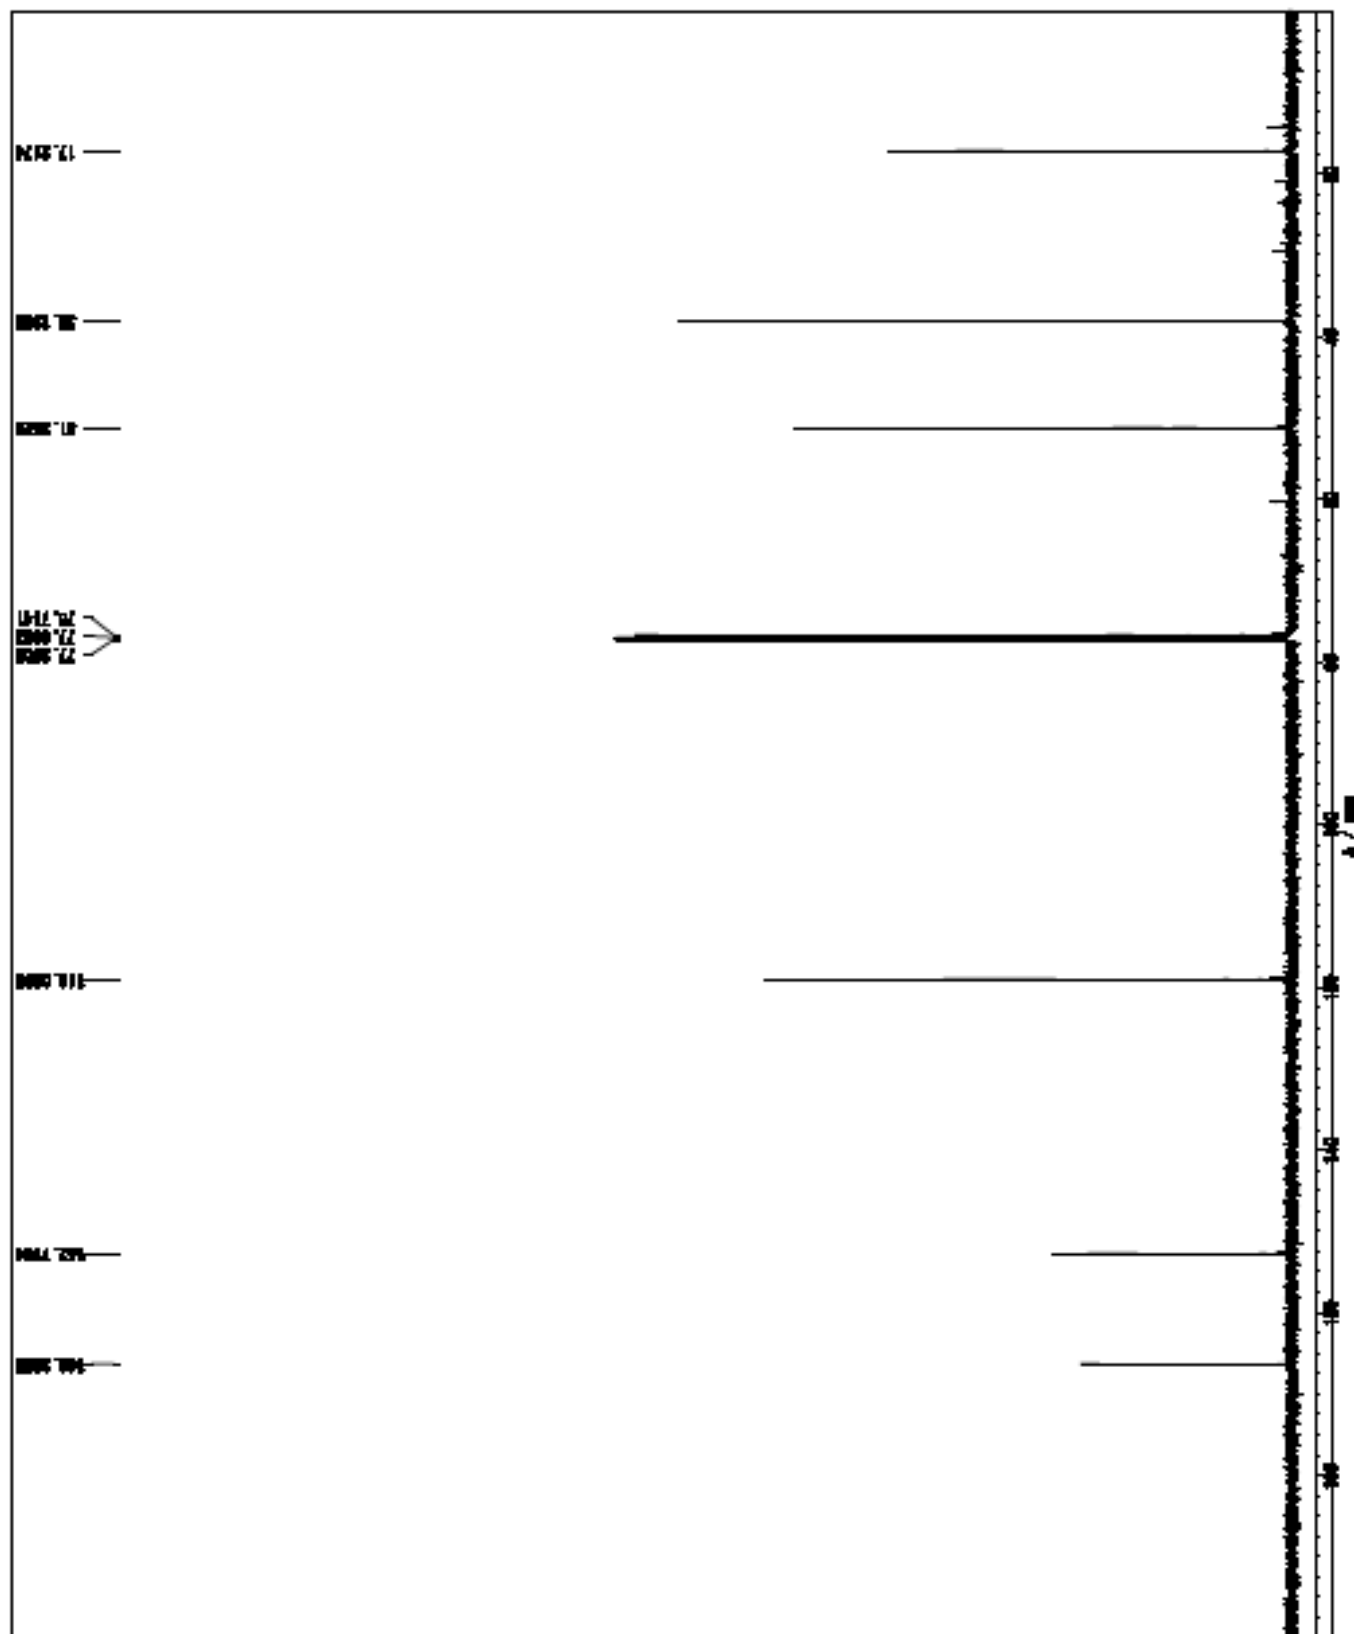

# Supporting Information II

## <sup>1</sup>H NMR of S9

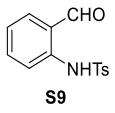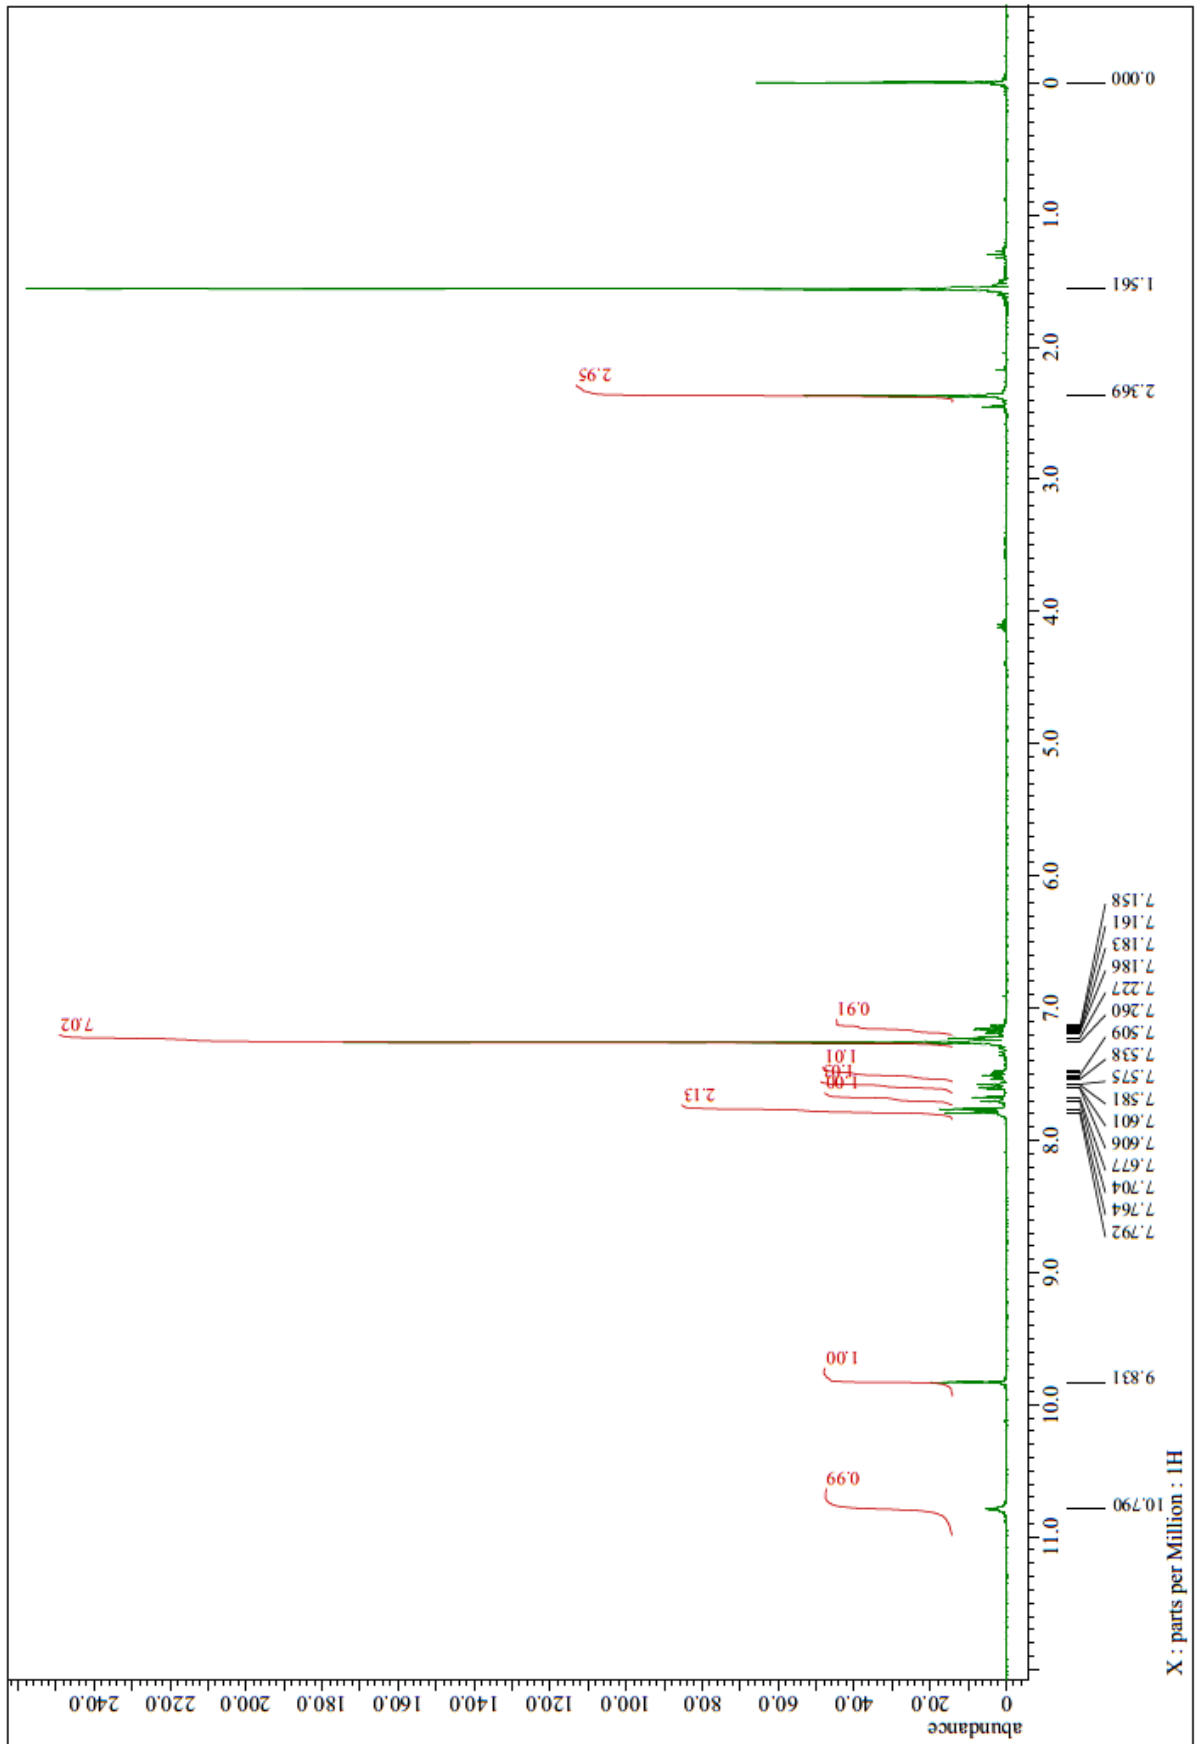

# Supporting Information II

## <sup>1</sup>H NMR of 2b

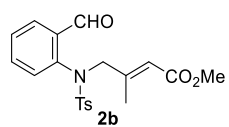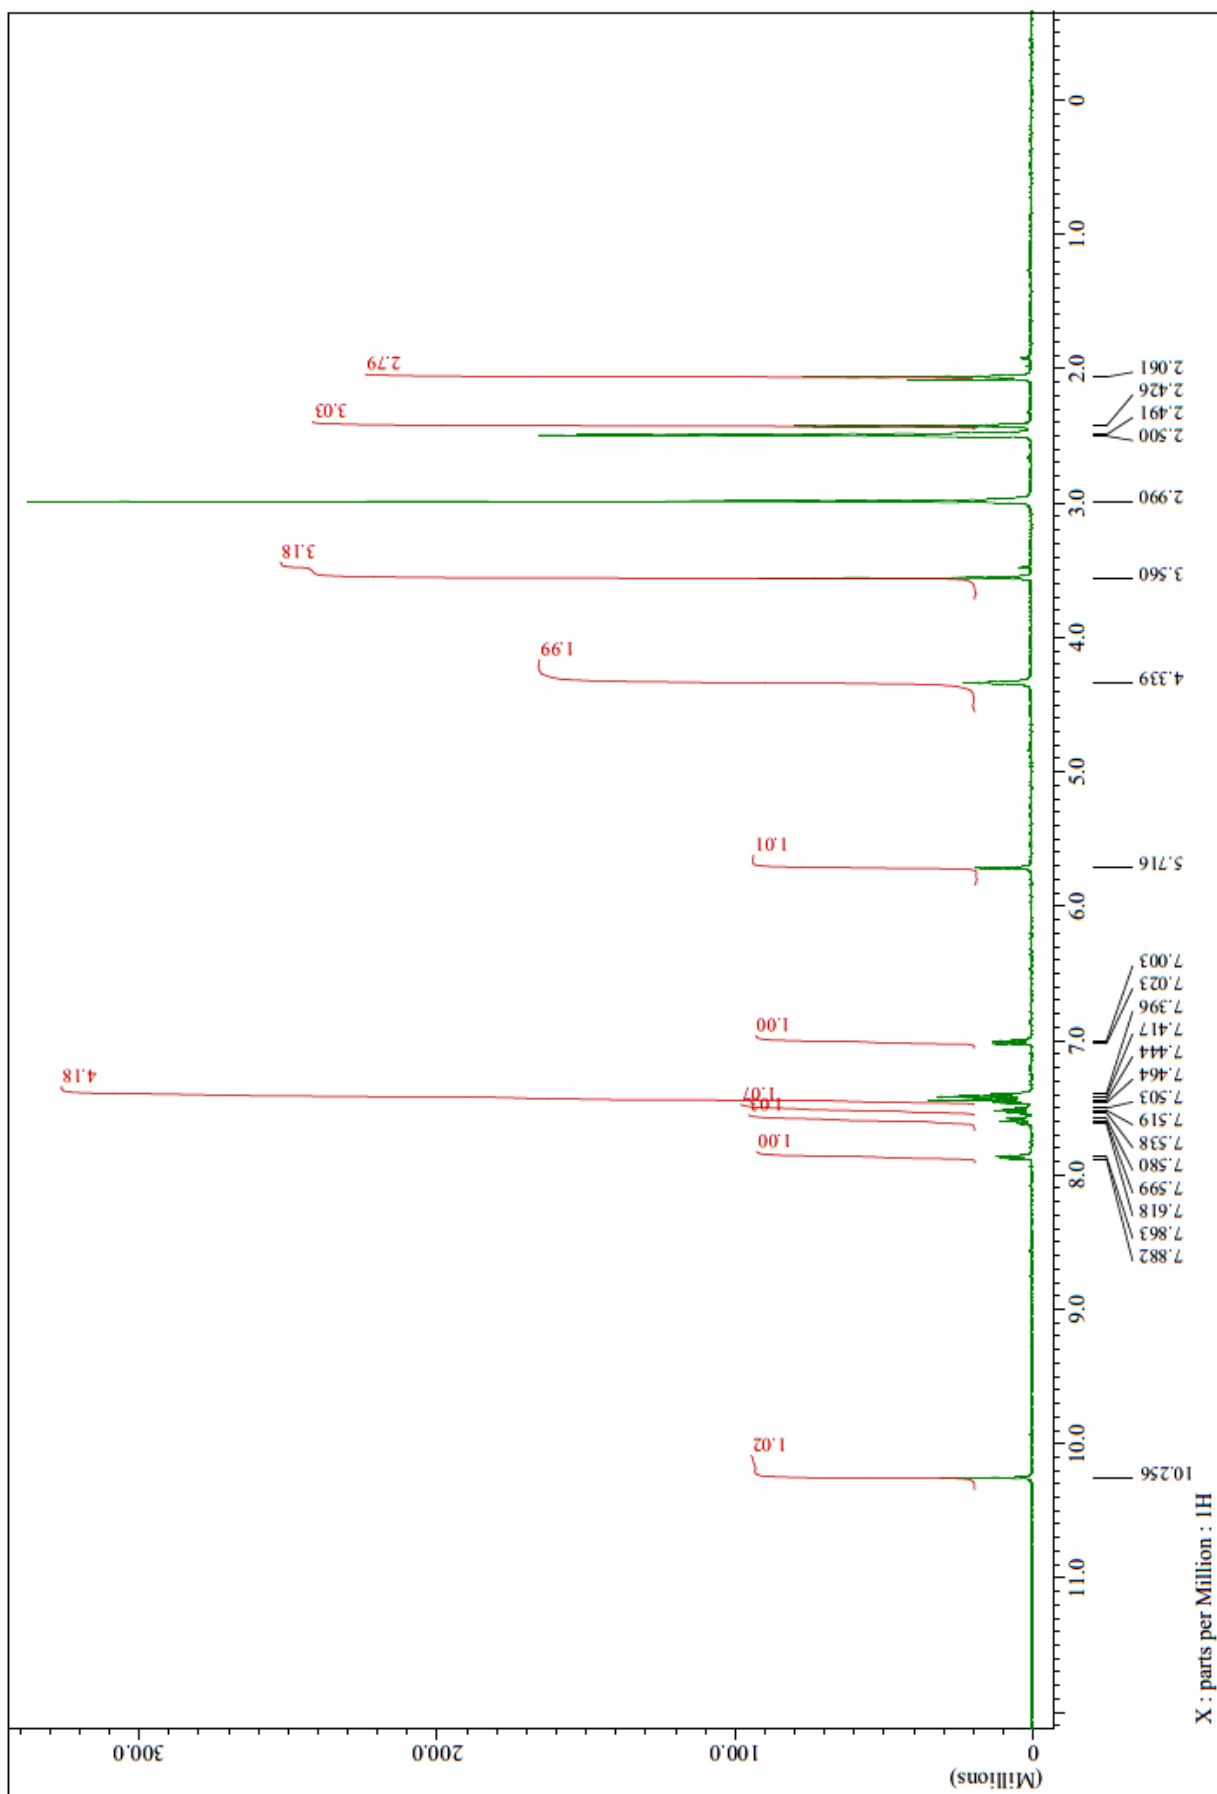

# Supporting Information II

## <sup>13</sup>C NMR of 2b

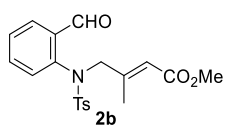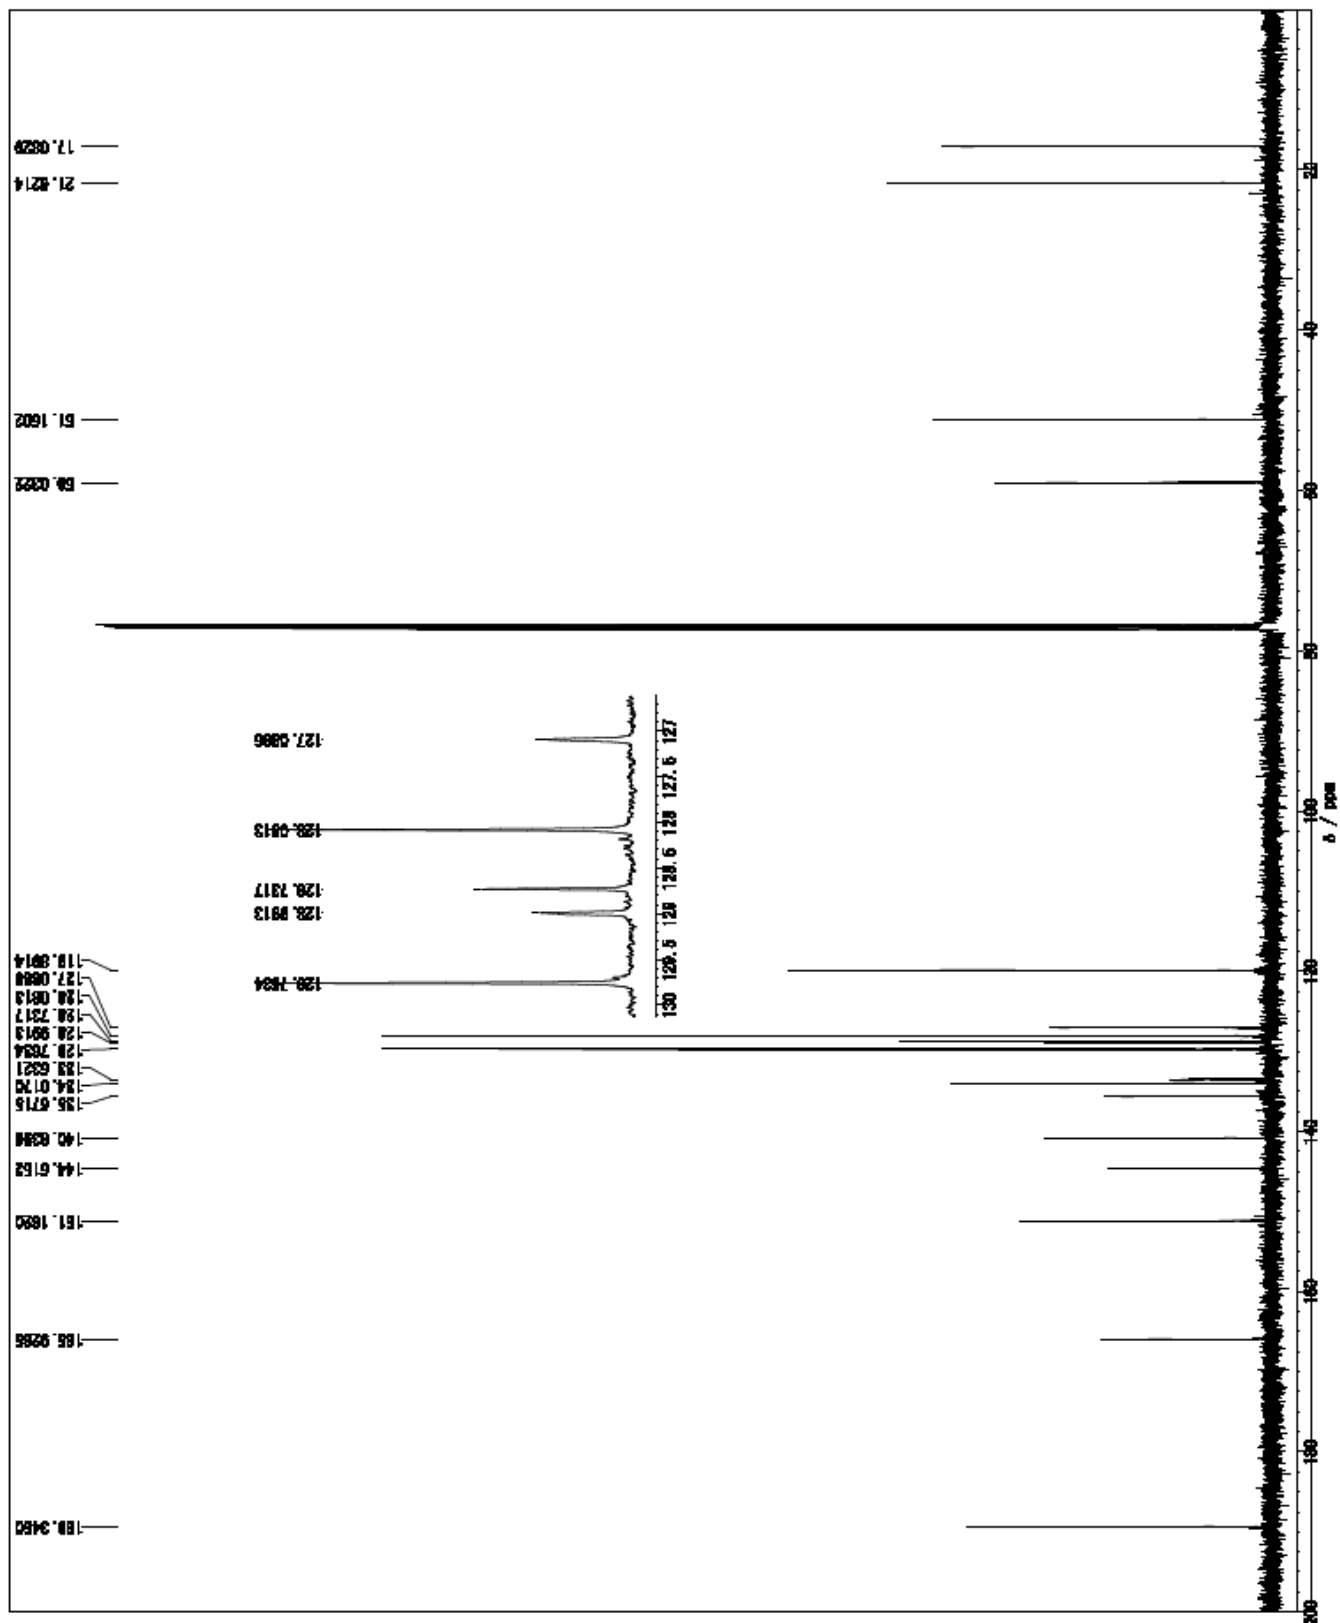



# Supporting Information II

## <sup>1</sup>H NMR of 3a

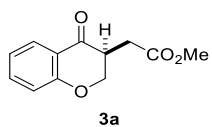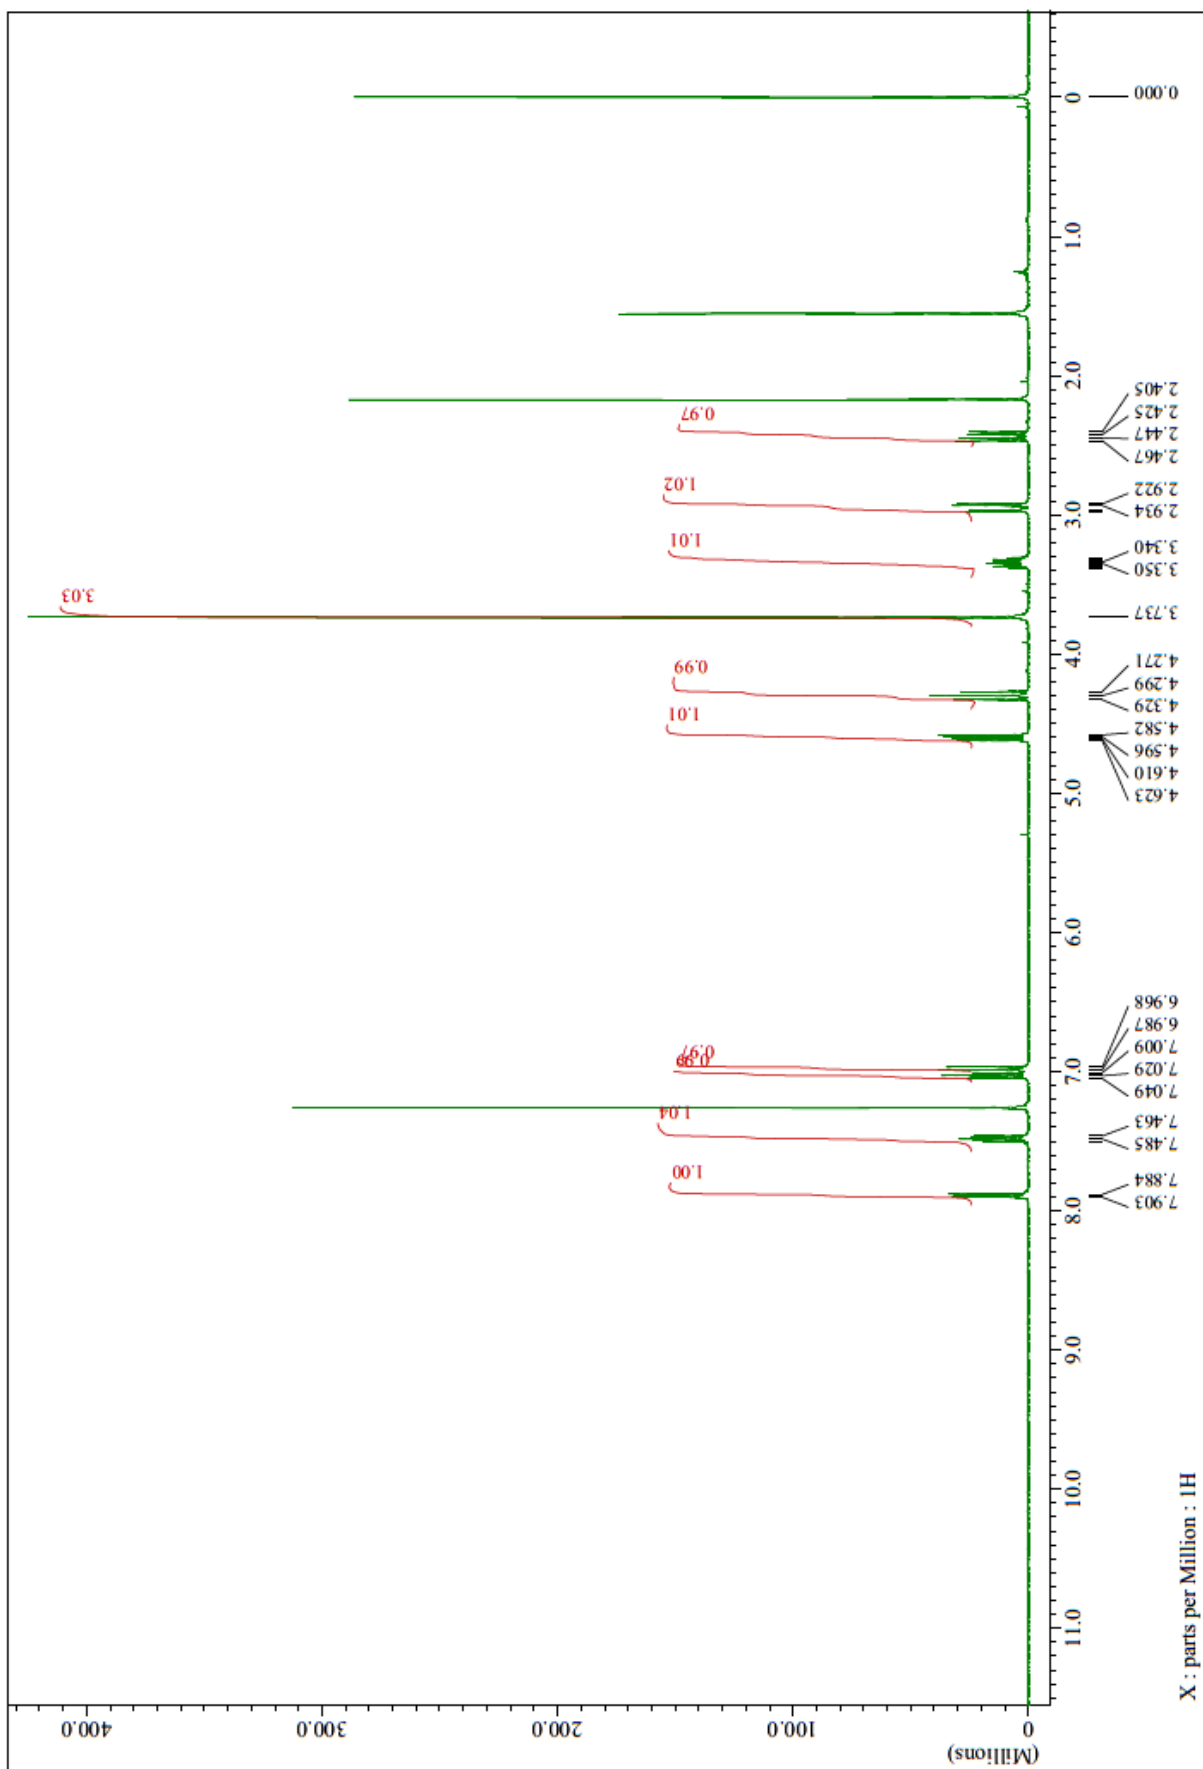

## Supporting Information II

### $^{13}\text{C}$ NMR of 3a

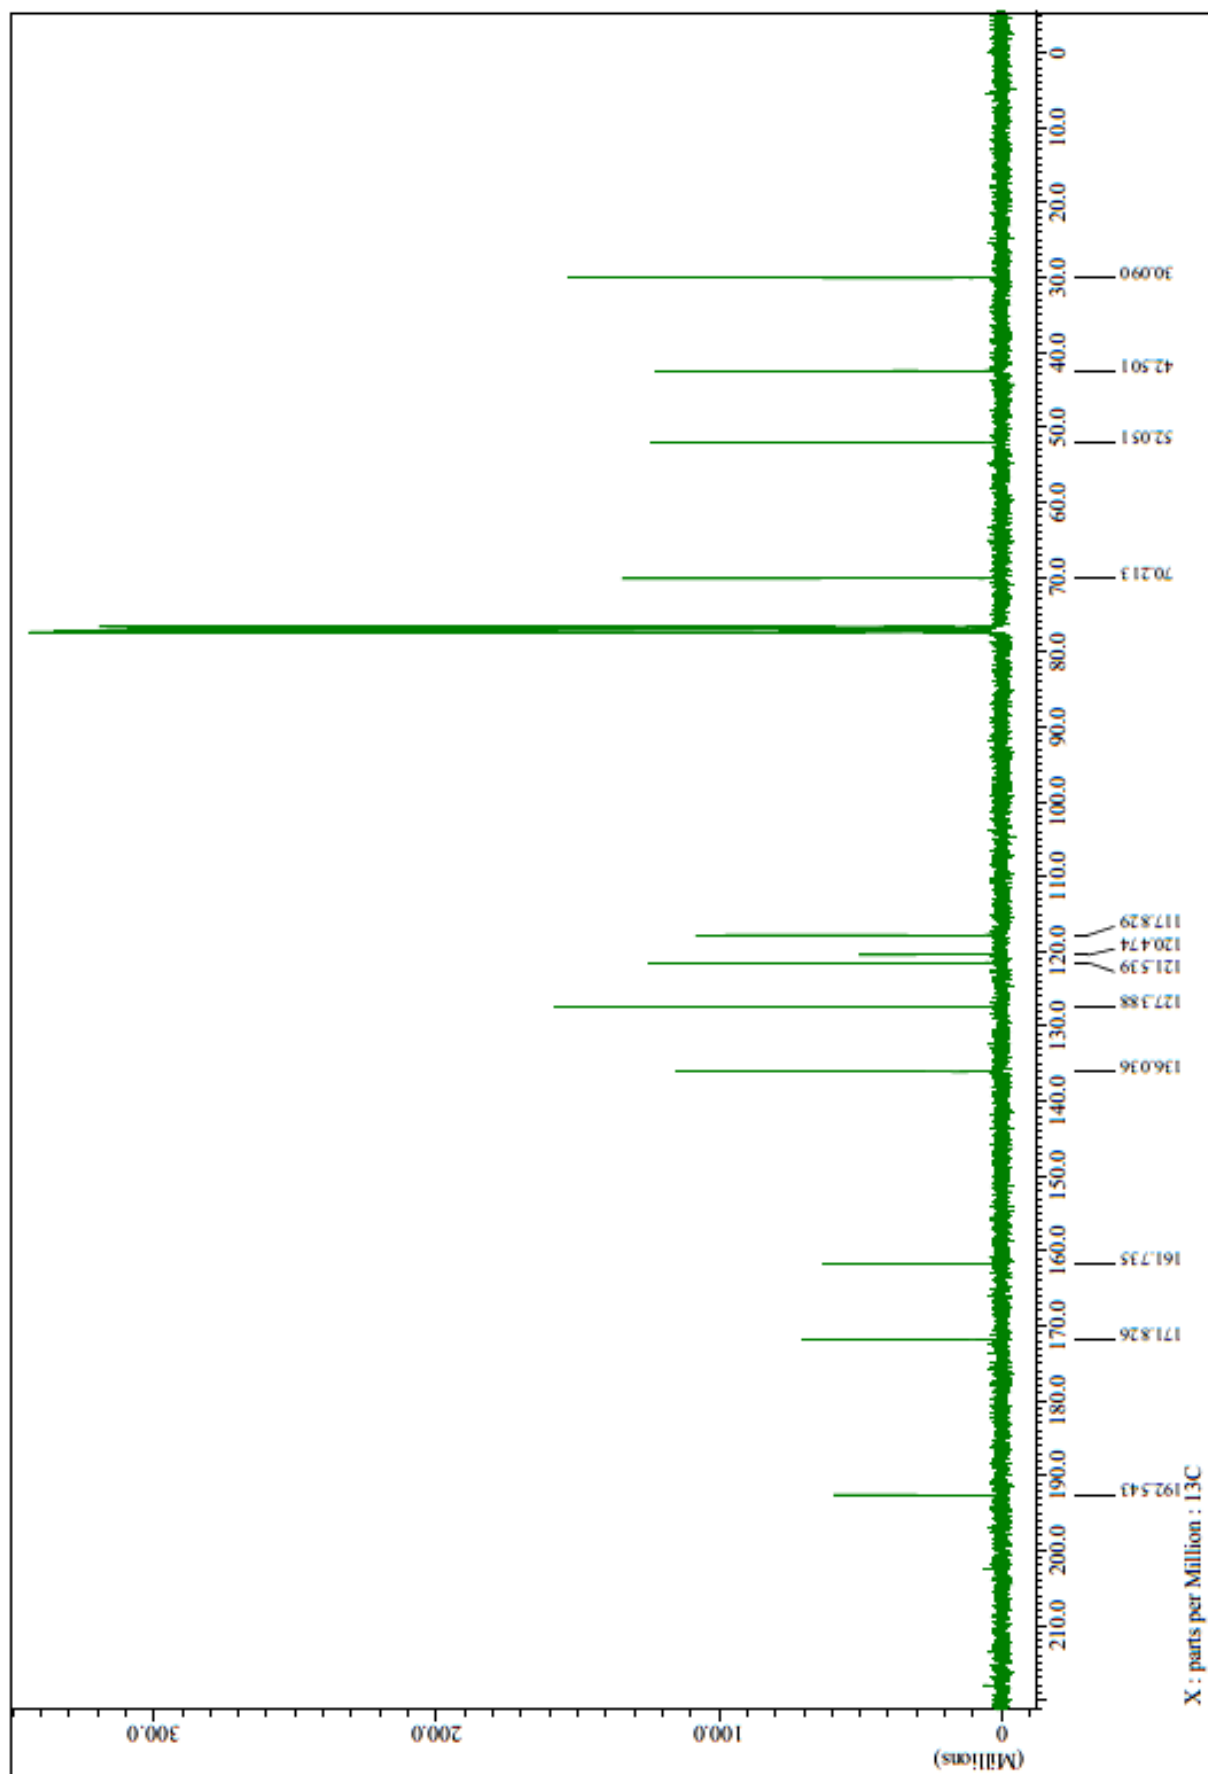

# Supporting Information II

## <sup>1</sup>H NMR of 3b

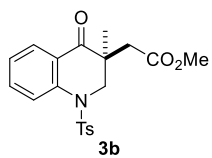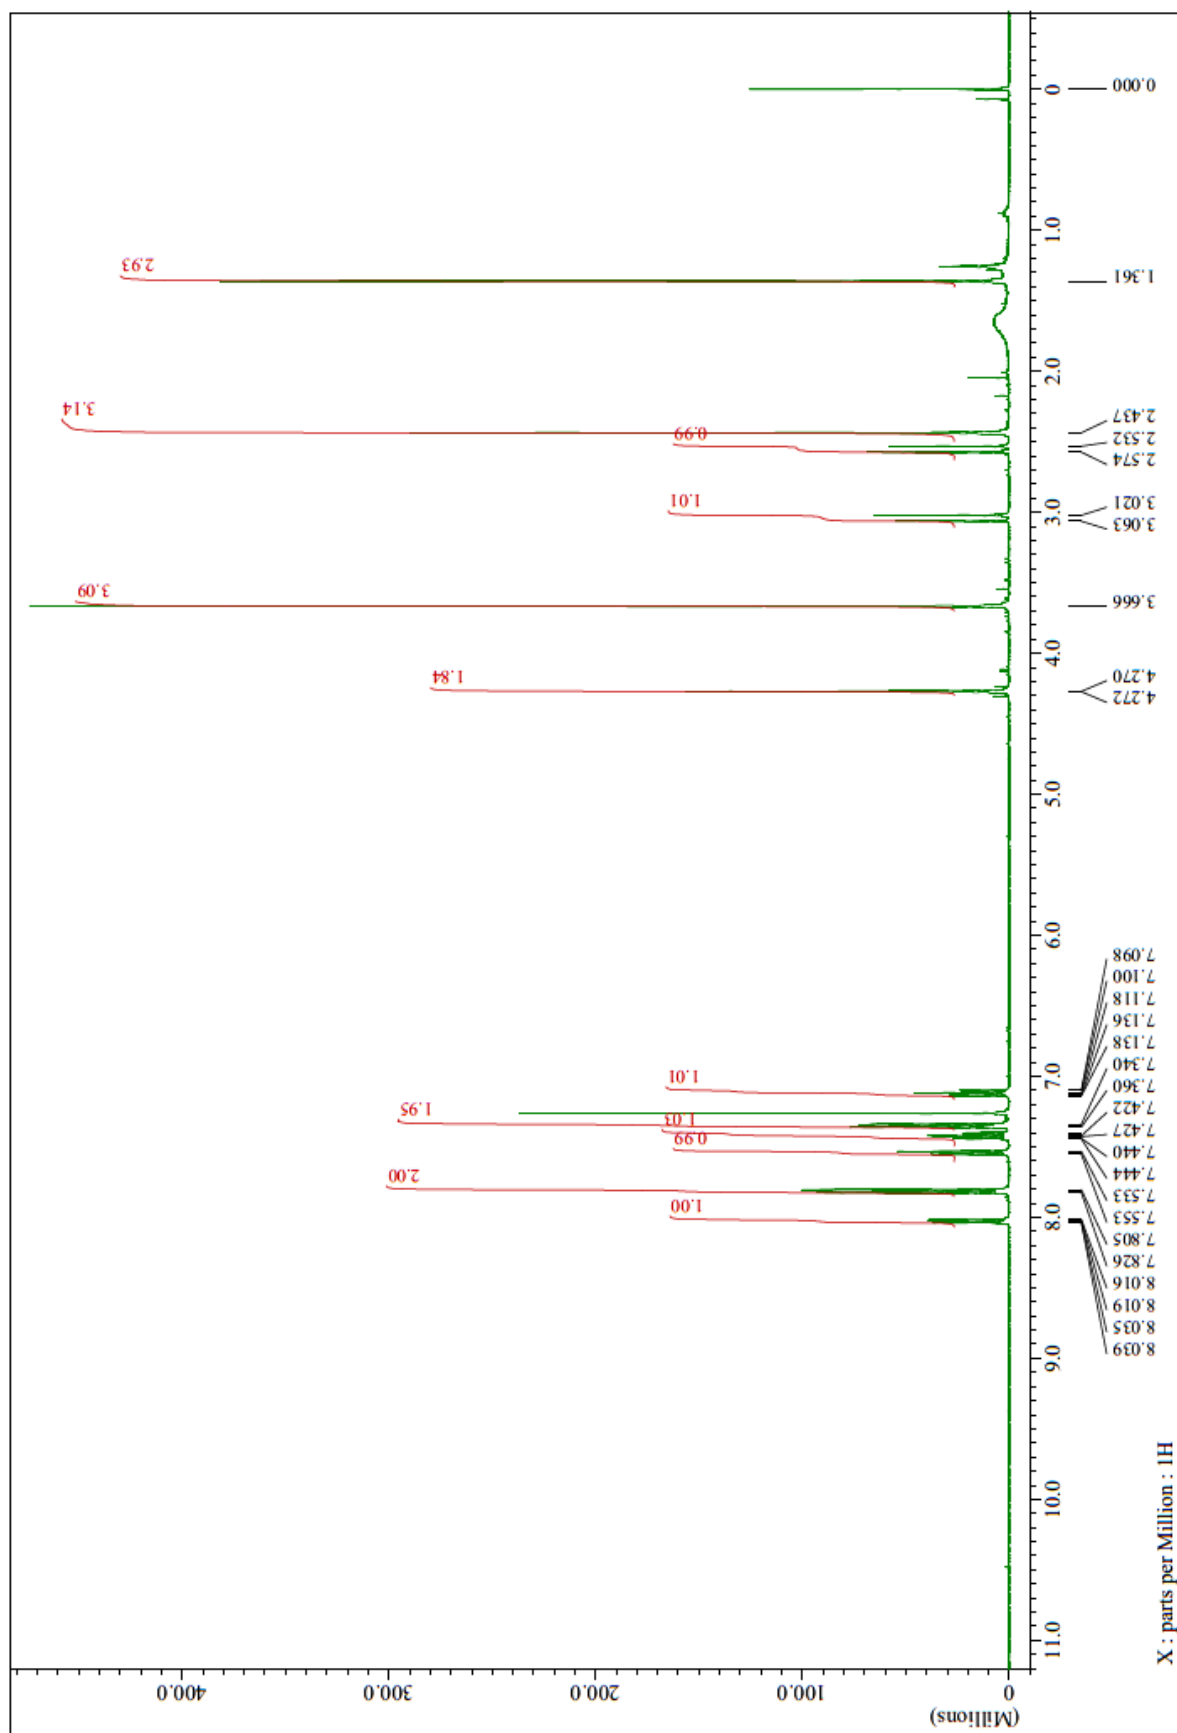

# Supporting Information II

## $^{13}\text{C}$ NMR of 3b

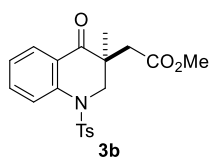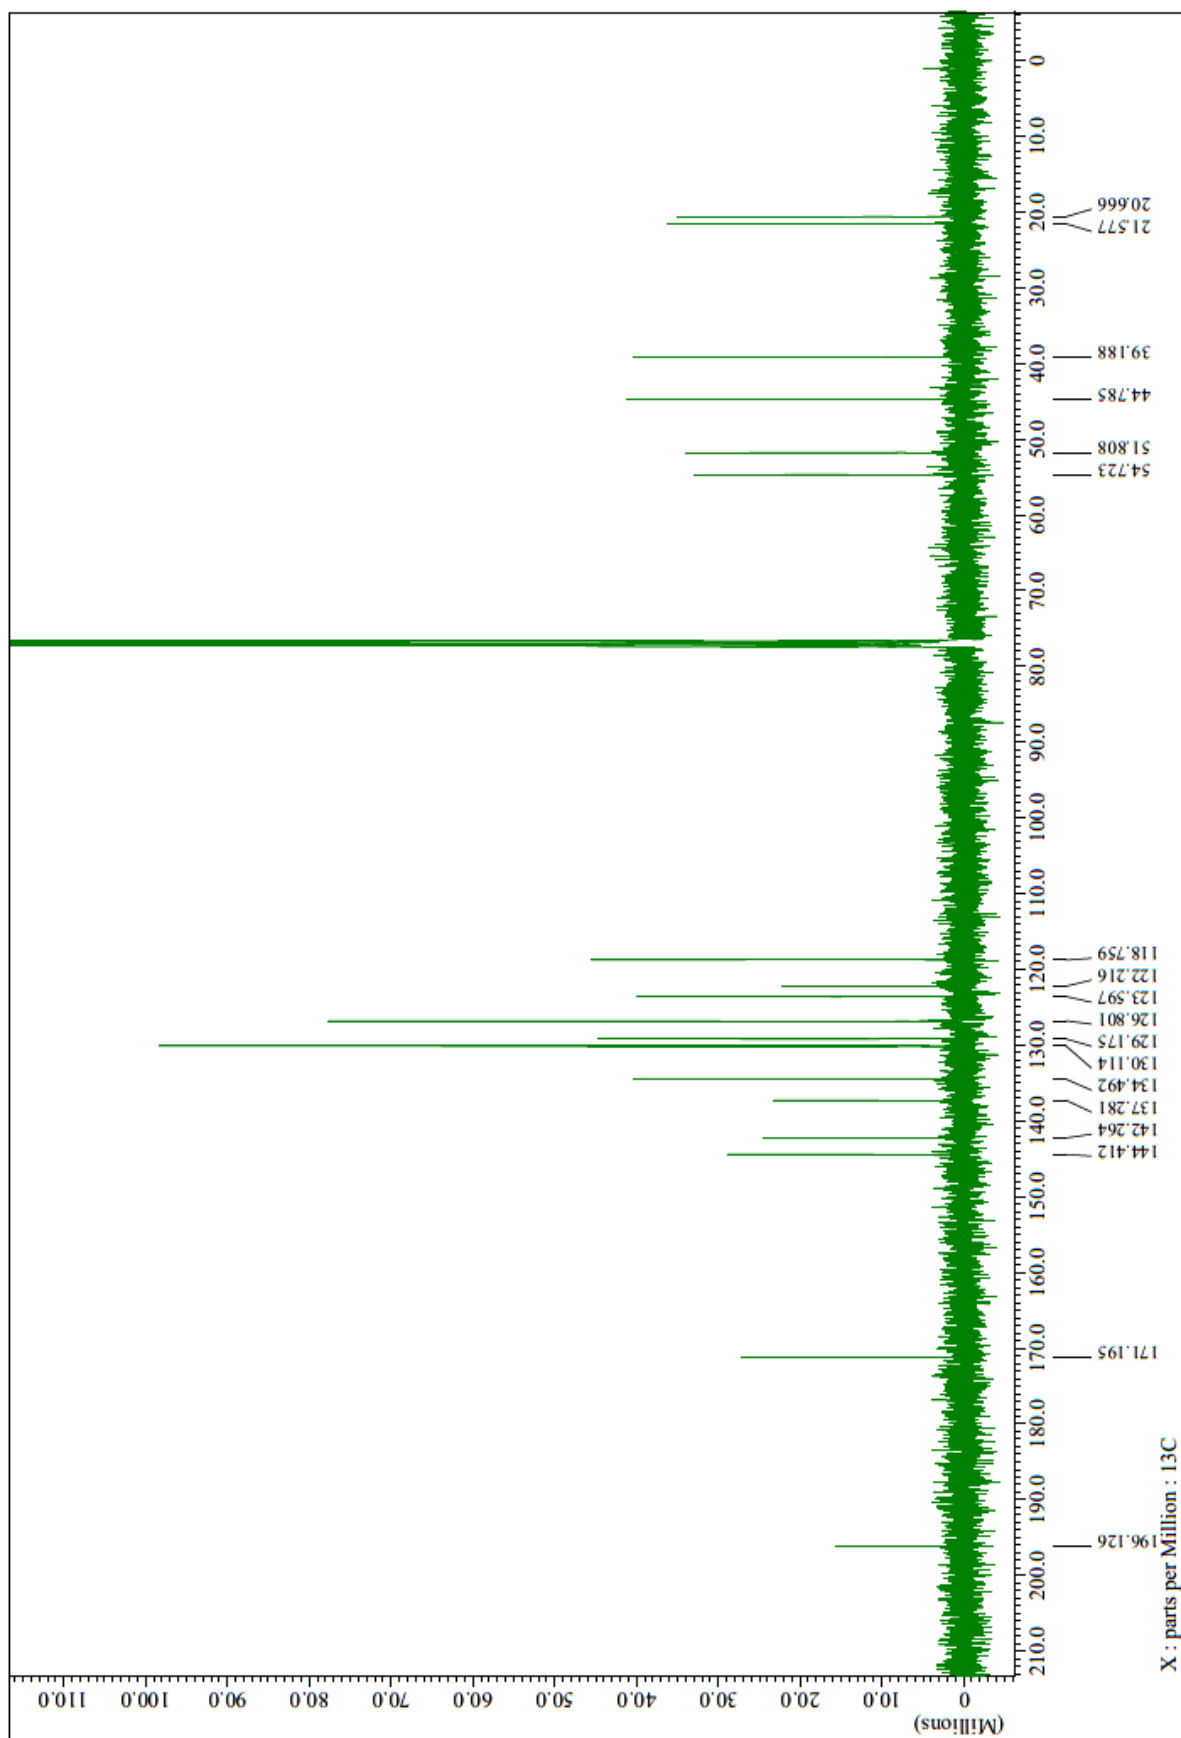

# Supporting Information II

## <sup>1</sup>H NMR of 4

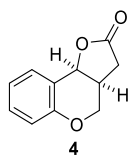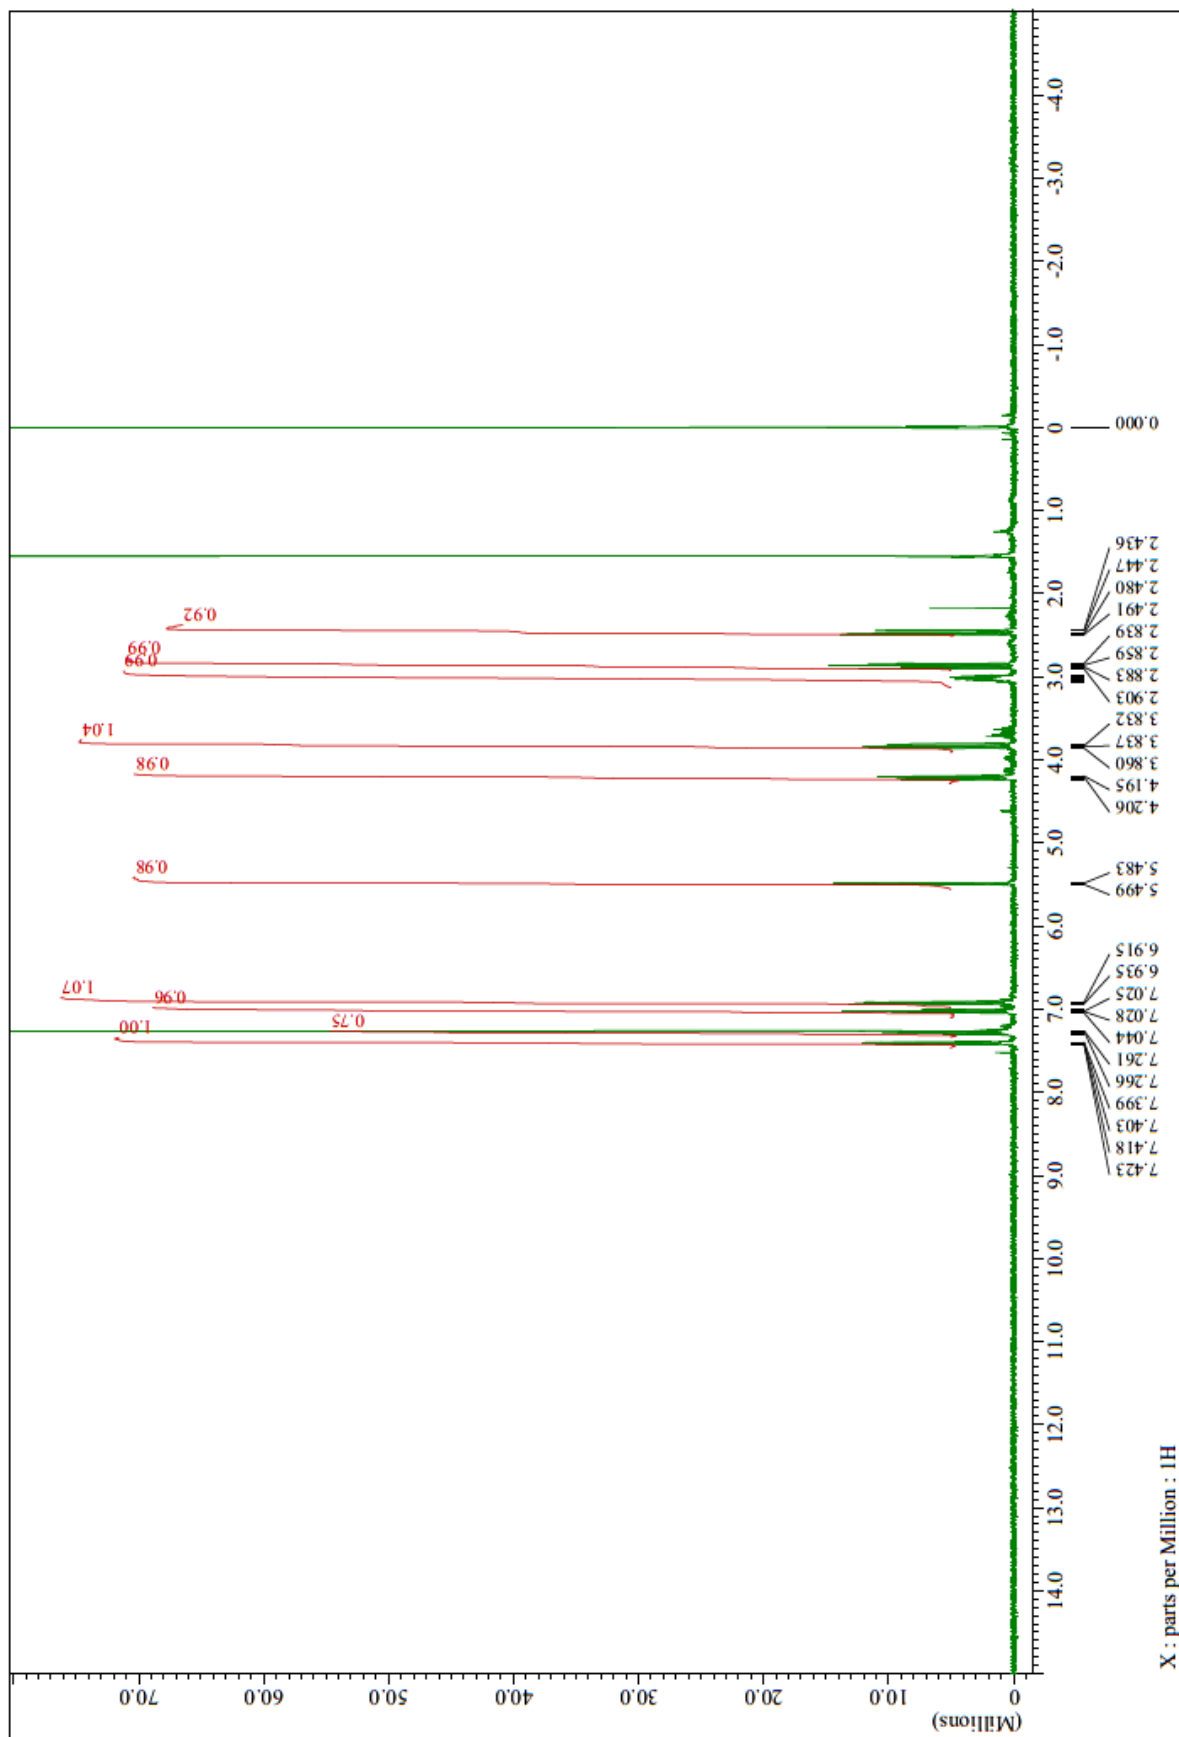

# Supporting Information II

## <sup>1</sup>H NMR of 5

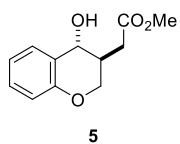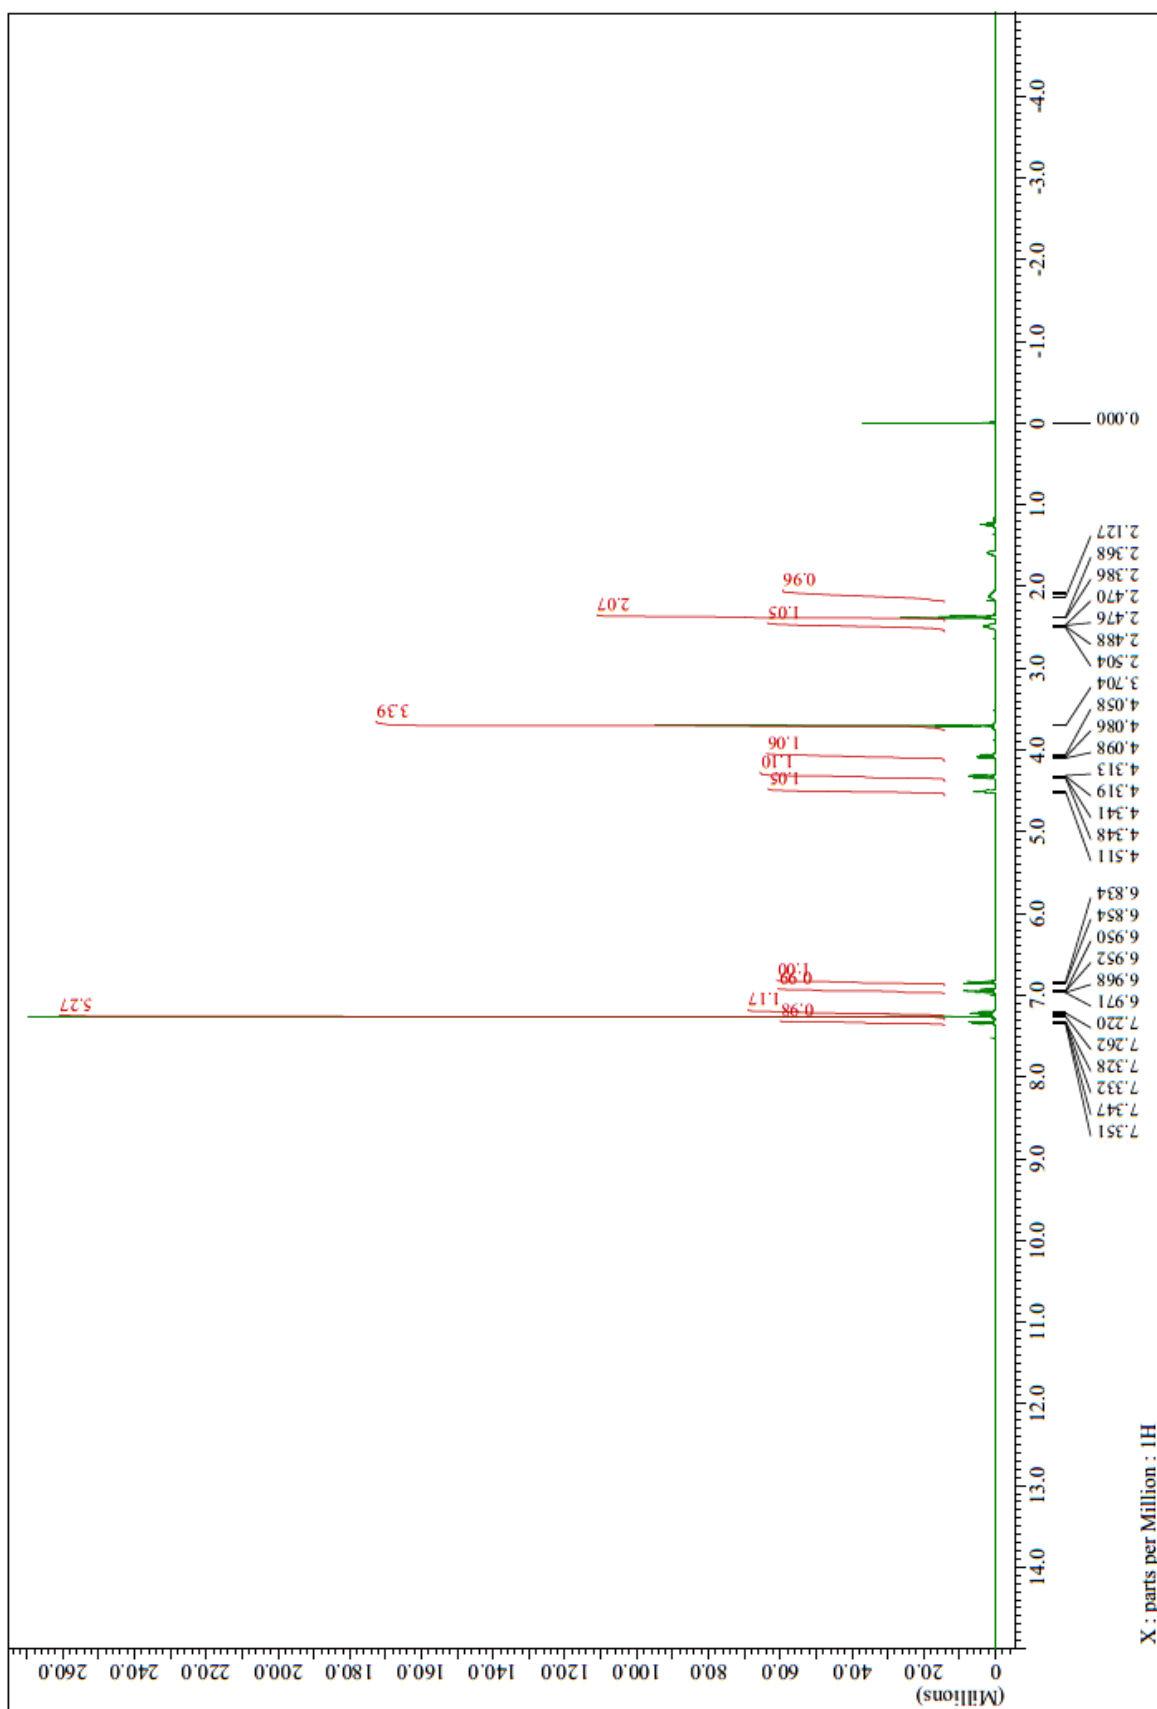

# Supporting Information II

## <sup>1</sup>H NMR of 6

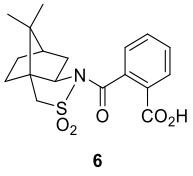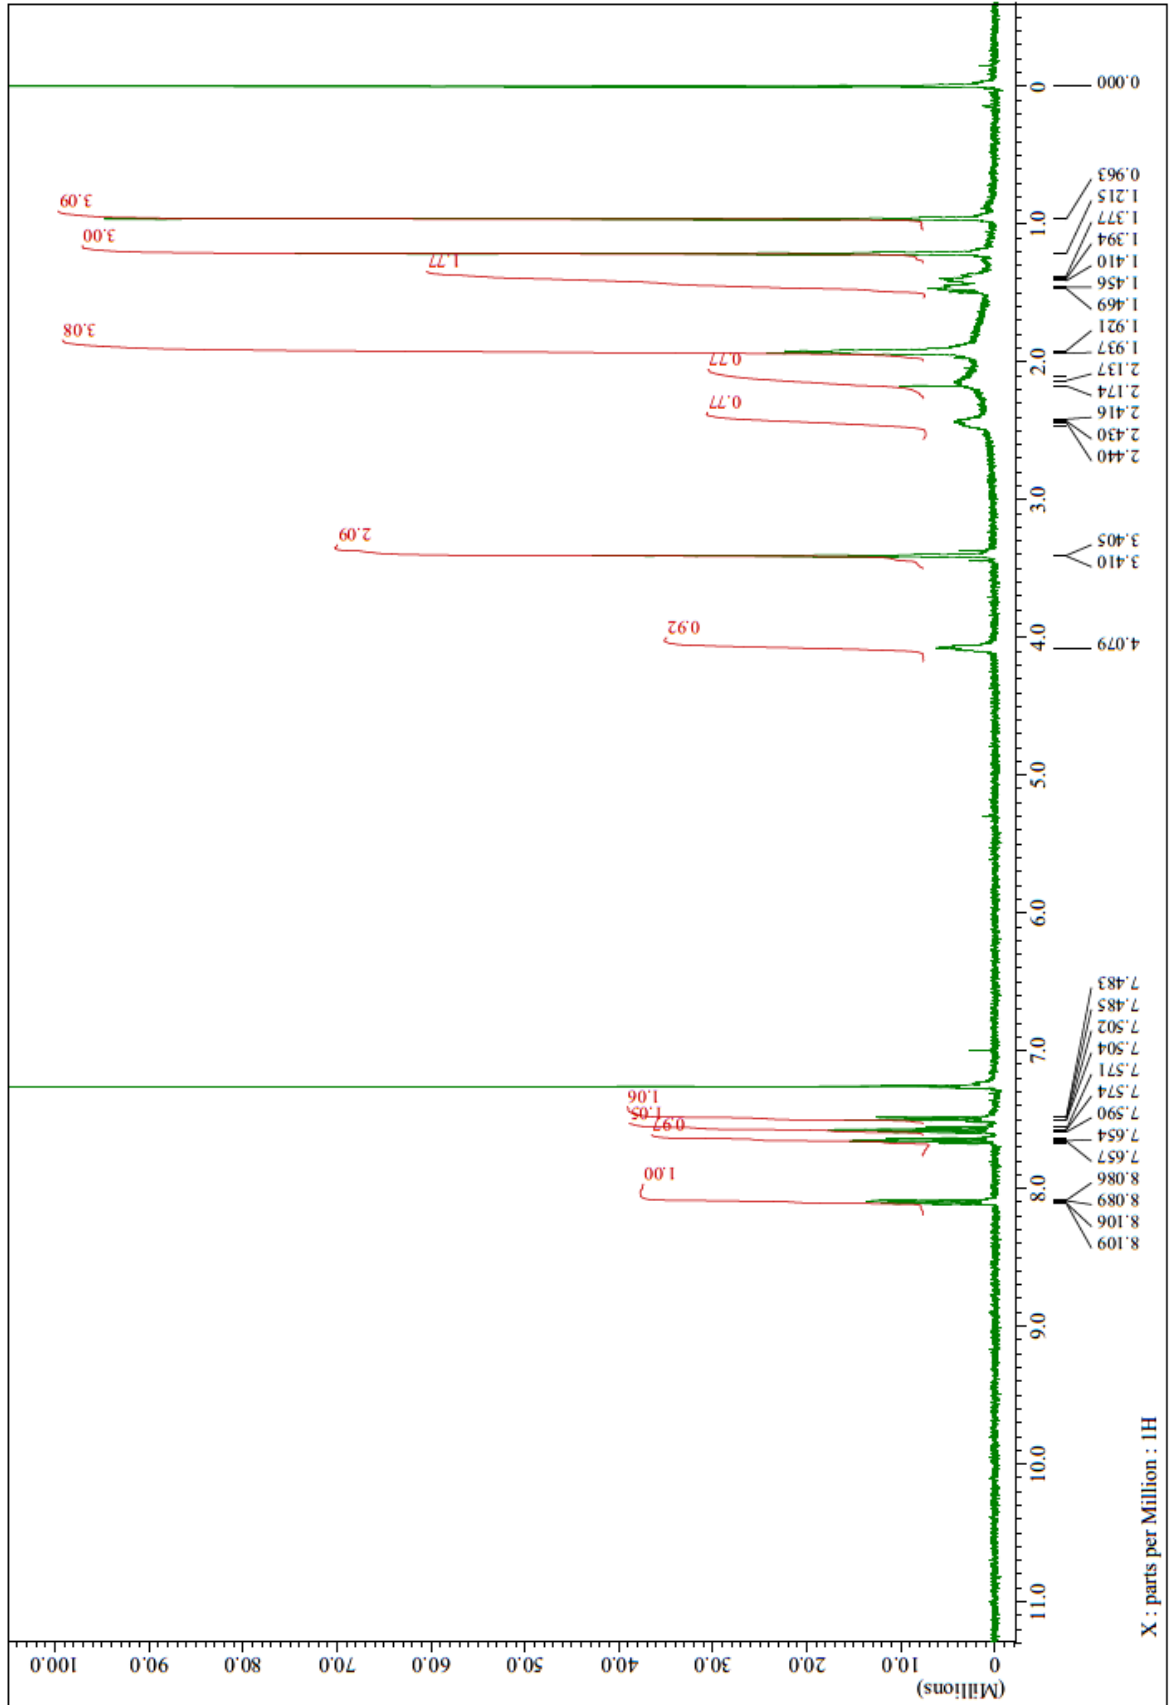

# Supporting Information II

## $^{13}\text{C}$ NMR of 6

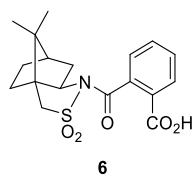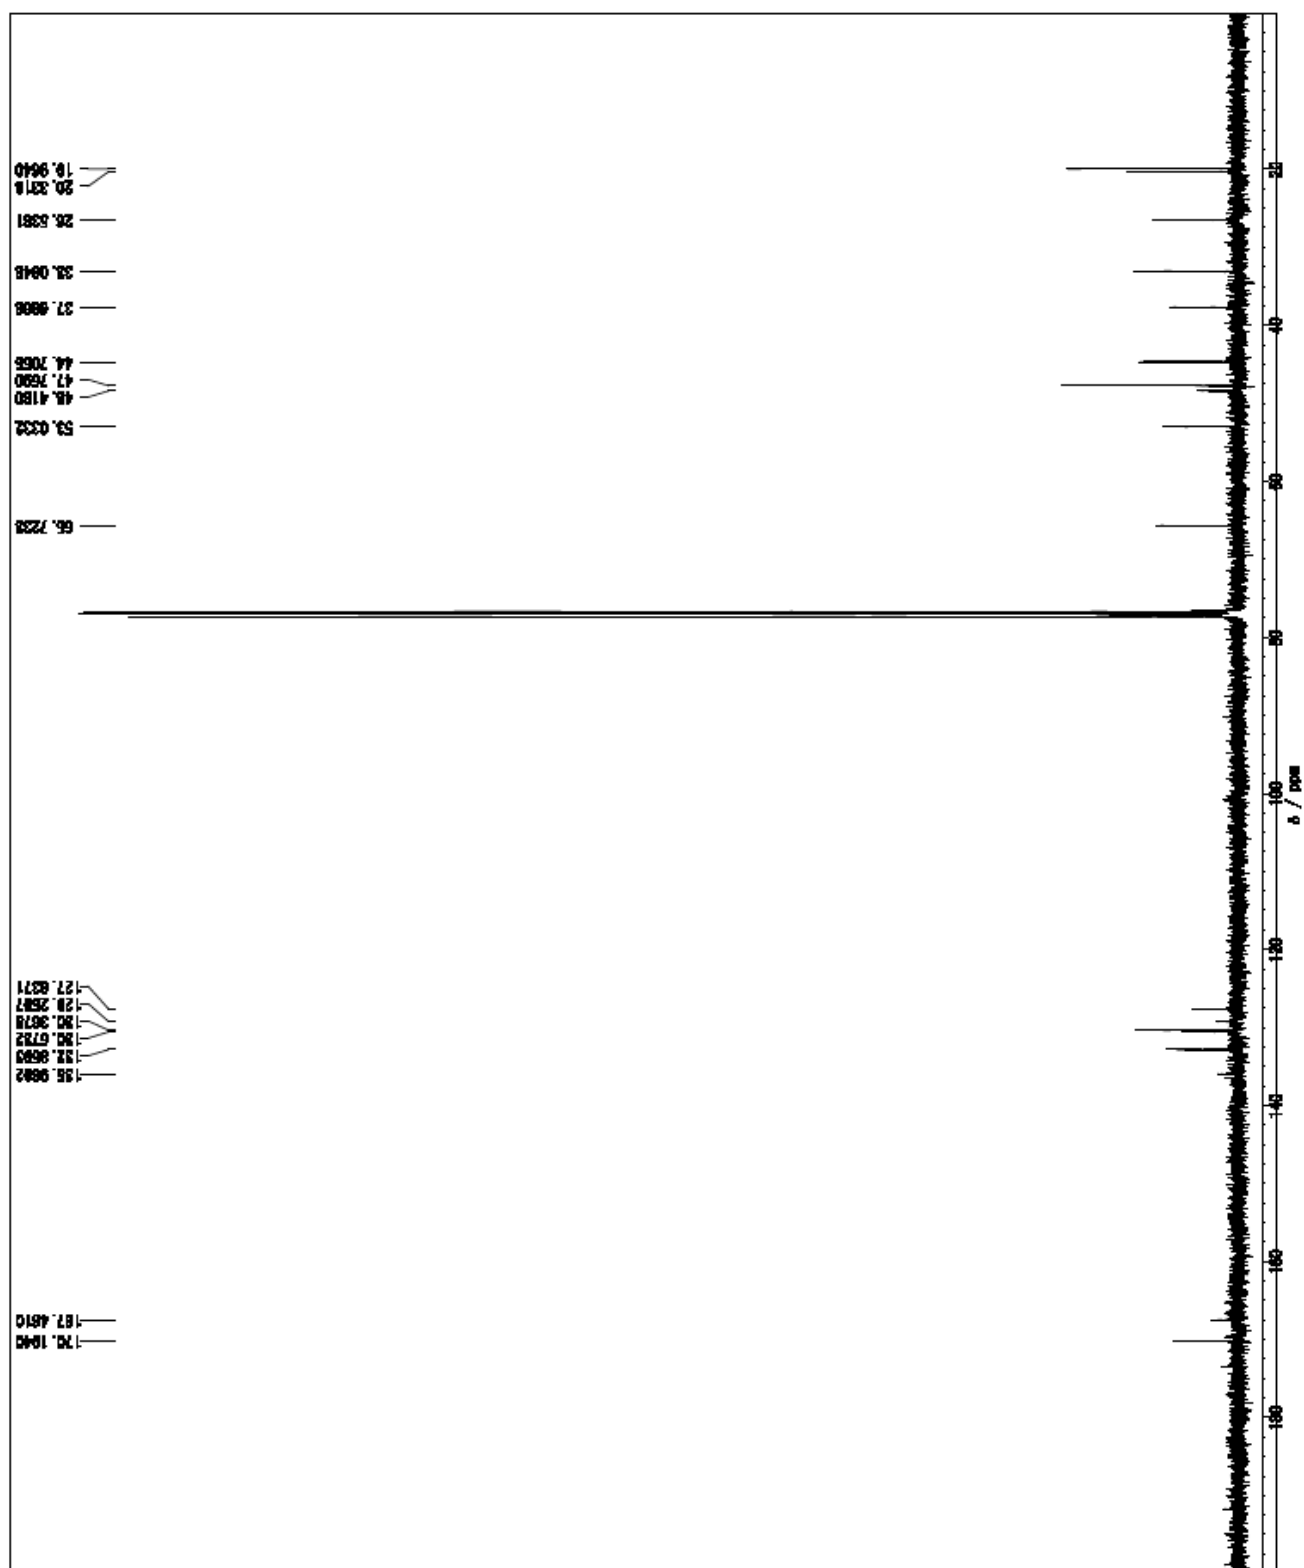



# Supporting Information II

## <sup>1</sup>H NMR of 7

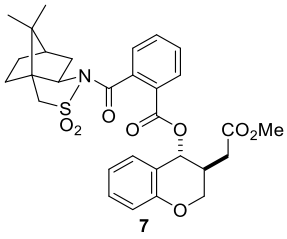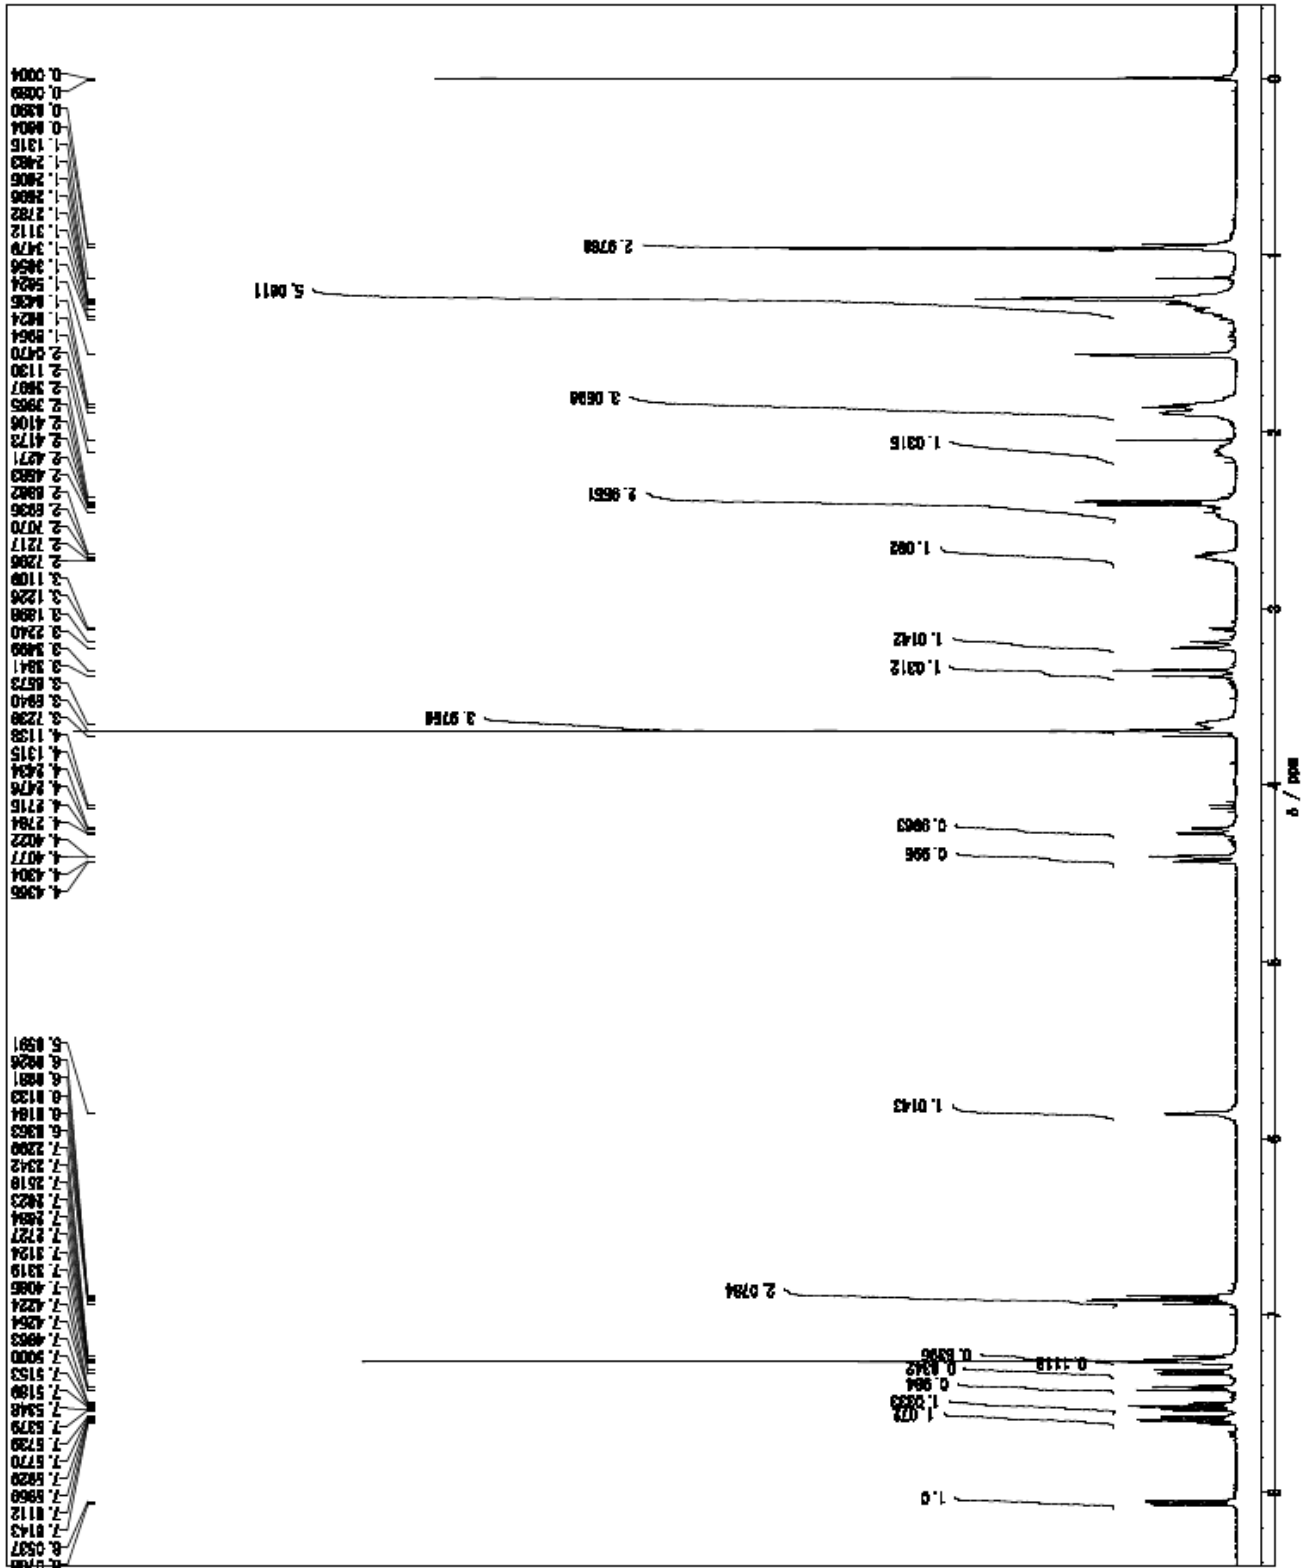



# Supporting Information II

## <sup>1</sup>H NMR of 3c

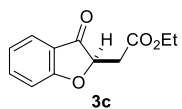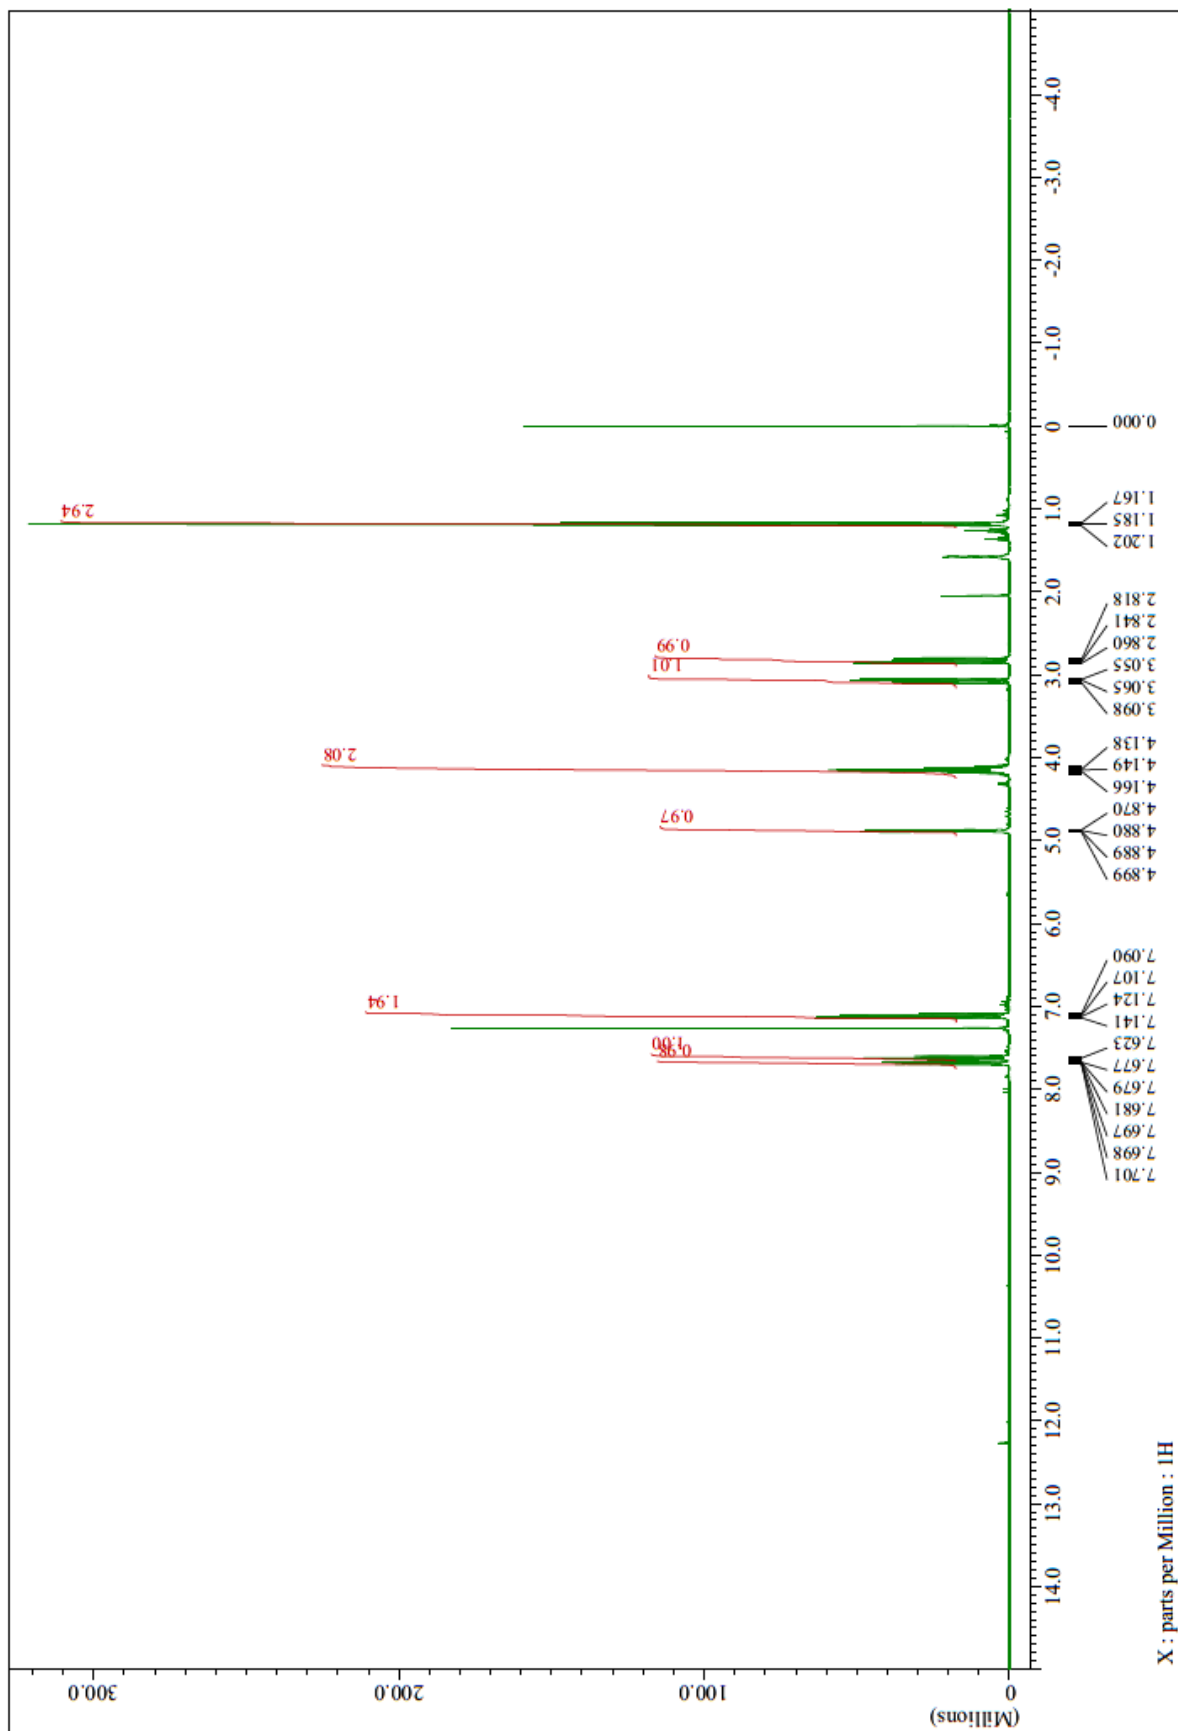

# Supporting Information II

## $^{13}\text{C}$ NMR of 3c

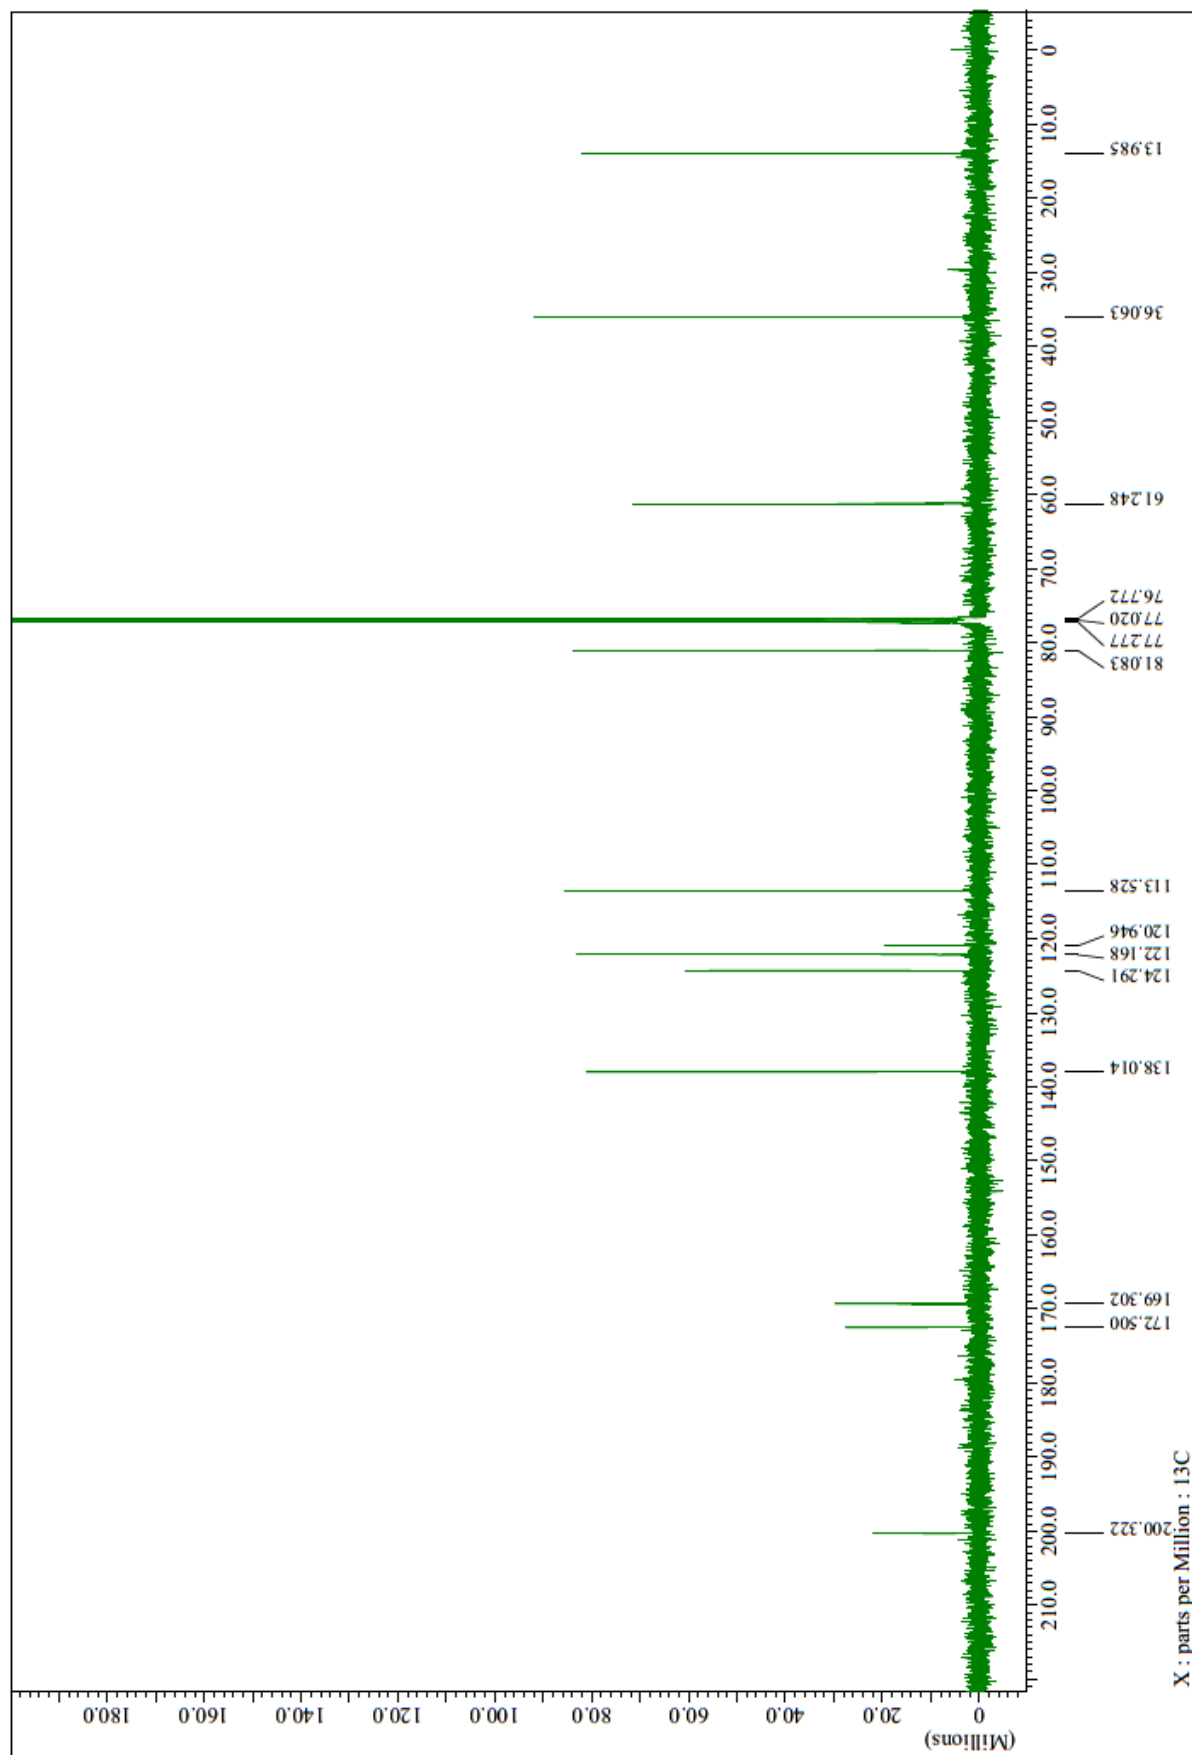

## Supporting Information II

### 2. Copies of HPLC charts

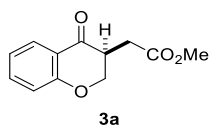

(±)-3a

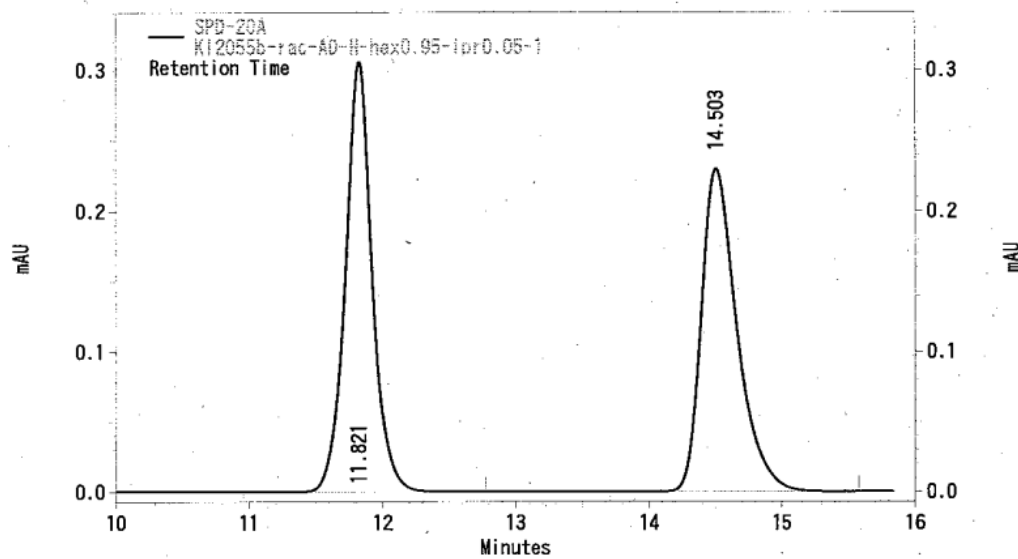

4

| Name   | Retention Time | Area    | Area Percent | Height |
|--------|----------------|---------|--------------|--------|
| 1      | 11.821         | 4250382 | 49.843       | 305876 |
| 2      | 14.503         | 4277135 | 50.157       | 229890 |
| Totals |                | 8527517 | 100.000      | 535766 |

V

R-3a in Table 1, Entry 1 (92% ee, *ent*-1c was used)

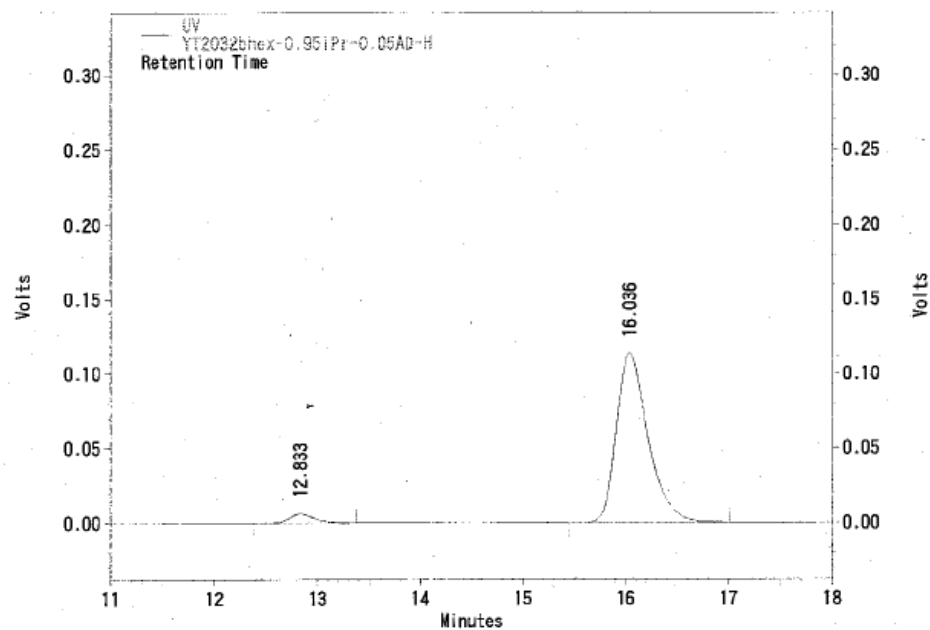

SPD-20A Results

| Retention Time | Area    | Area %  | Height |
|----------------|---------|---------|--------|
| 12.833         | 100774  | 4.013   | 6135   |
| 16.036         | 2410566 | 95.987  | 113259 |
| Totals         |         | 2511340 | 119394 |

## Supporting Information II

S-3a in Table 1, Entry 2 (96% ee)

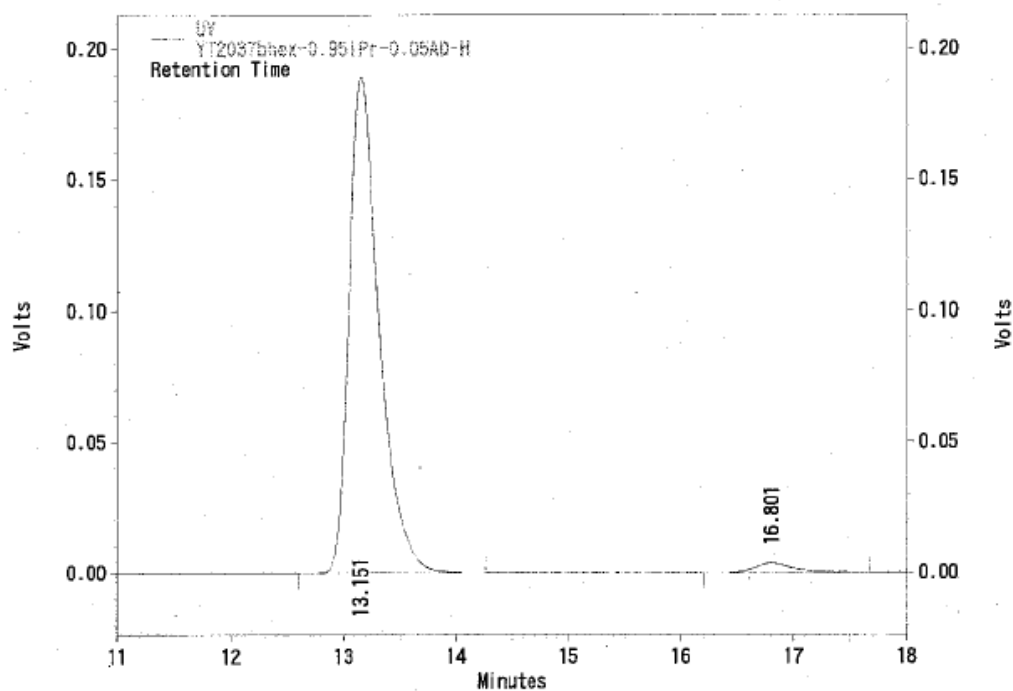

| SPD-20A Results |                |                |               |
|-----------------|----------------|----------------|---------------|
| Retention Time  | Area           | Area %         | Height        |
| 13.151          | 3487547        | 97.750         | 189153        |
| 16.801          | 80273          | 2.250          | 3508          |
| <b>Totals</b>   | <b>3567820</b> | <b>100.000</b> | <b>192661</b> |

R-3a in Table 1, Entry 3 (97% ee, *ent-1a* was used)

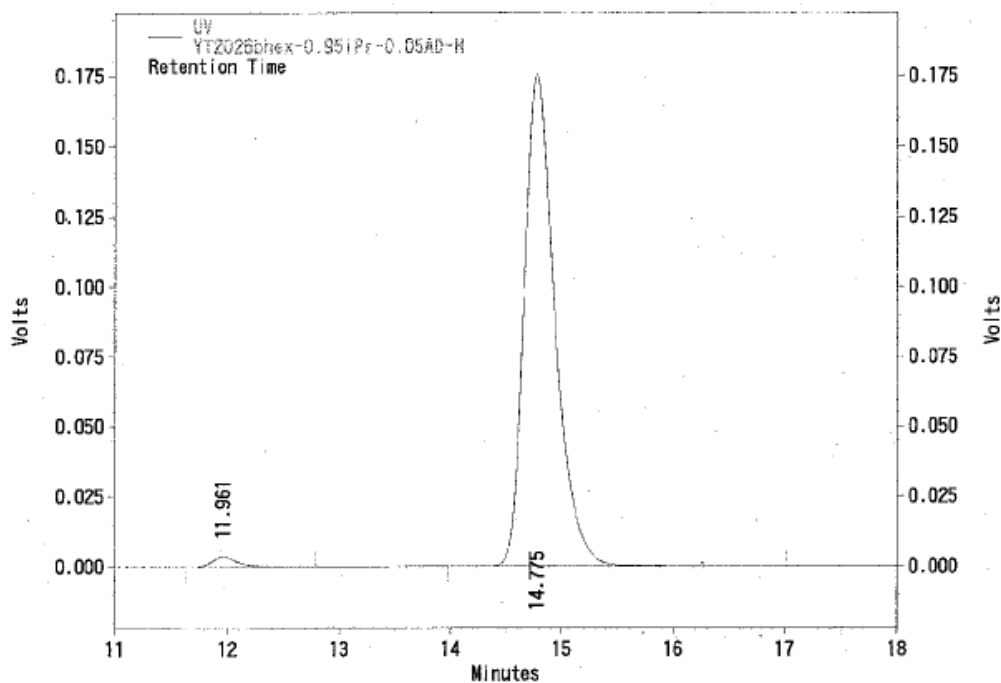

| SPD-20A Results |                |                |               |
|-----------------|----------------|----------------|---------------|
| Retention Time  | Area           | Area %         | Height        |
| 11.961          | 52326          | 1.527          | 3632          |
| 14.775          | 3373897        | 98.473         | 175492        |
| <b>Totals</b>   | <b>3426223</b> | <b>100.000</b> | <b>179124</b> |

## Supporting Information II

R-3a in Table 1, Entry 4 (98% ee, *ent*-1d was used)

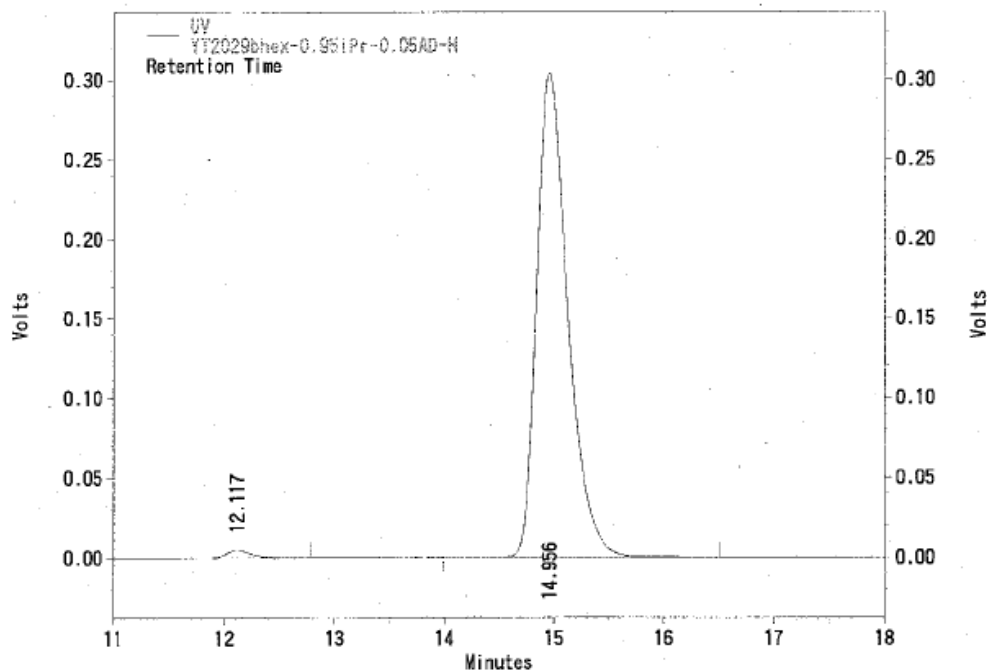

| SPD-20A Results |         |        |        |
|-----------------|---------|--------|--------|
| Retention Time  | Area    | Area % | Height |
| 12.117          | 71864   | 1.189  | 5027   |
| 14.956          | 5969976 | 98.811 | 303800 |

| Totals | Area    | Area %  | Height |
|--------|---------|---------|--------|
|        | 6041840 | 100.000 | 308827 |

S-3a in Table 1, Entry 5 (98% ee)

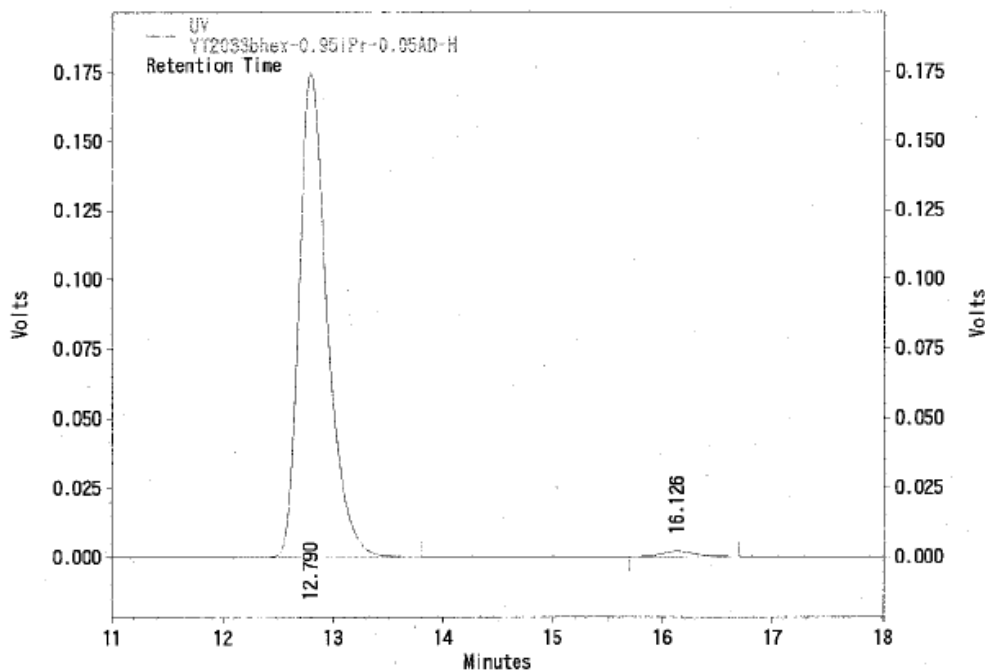

| SPD-20A Results |         |        |        |
|-----------------|---------|--------|--------|
| Retention Time  | Area    | Area % | Height |
| 12.790          | 3078441 | 98.761 | 174645 |
| 16.126          | 38625   | 1.239  | 1872   |

| Totals | Area    | Area %  | Height |
|--------|---------|---------|--------|
|        | 3117066 | 100.000 | 176517 |

## Supporting Information II

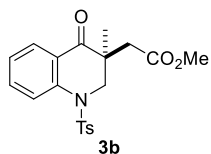

(±)-**3b**

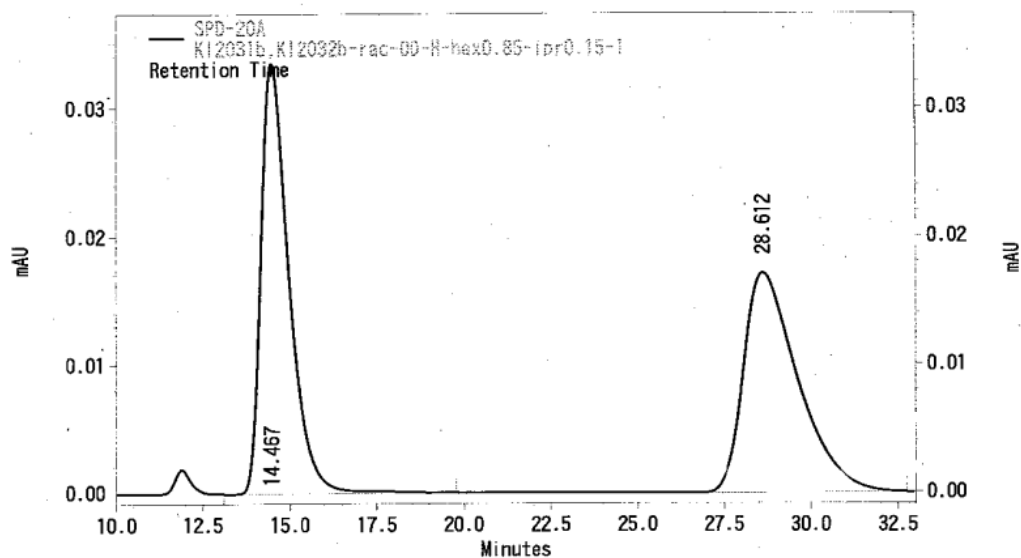

4

| Name          | Retention Time | Area           | Area Percent   | Height       |
|---------------|----------------|----------------|----------------|--------------|
| 1             | 14.467         | 1884952        | 50.265         | 33548        |
| 2             | 28.612         | 1865113        | 49.735         | 17150        |
| <b>Totals</b> |                | <b>3750065</b> | <b>100.000</b> | <b>50698</b> |

v

*R*-**3b** in Table 1, Entry 6 (74% ee, *ent*-**1c** was used)

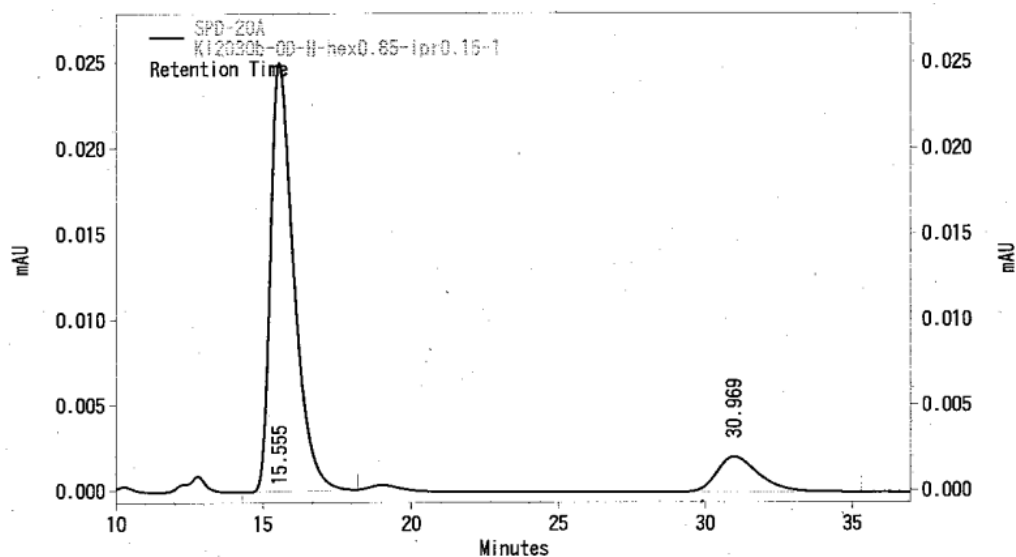

4

| Name          | Retention Time | Area           | Area Percent   | Height       |
|---------------|----------------|----------------|----------------|--------------|
| 1             | 15.555         | 1377977        | 86.969         | 24996        |
| 2             | 30.969         | 206465         | 13.031         | 2076         |
| <b>Totals</b> |                | <b>1584442</b> | <b>100.000</b> | <b>27072</b> |

v



## Supporting Information II

S-3b in Table 1, Entry 7 (78% ee)

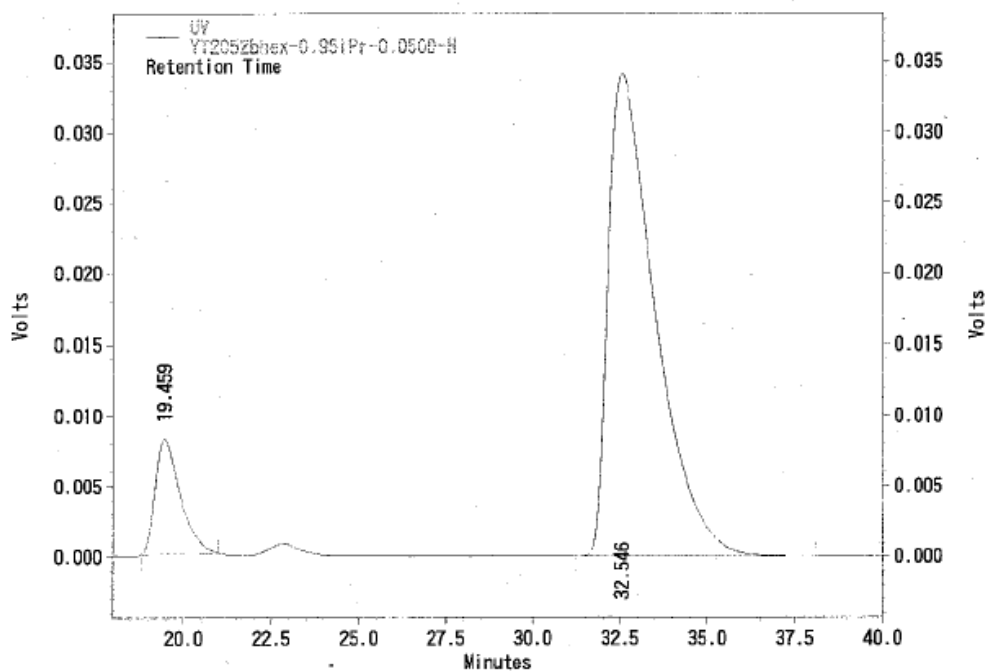

| SPD-20A Results |                |                |              |
|-----------------|----------------|----------------|--------------|
| Retention Time  | Area           | Area %         | Height       |
| 19.459          | 405852         | 11.239         | 8181         |
| 32.546          | 3205194        | 88.761         | 34104        |
| <b>Totals</b>   | <b>3611046</b> | <b>100.000</b> | <b>42285</b> |

R-3b in Table 1, Entry 8 (86% ee, *ent-1a* was used)

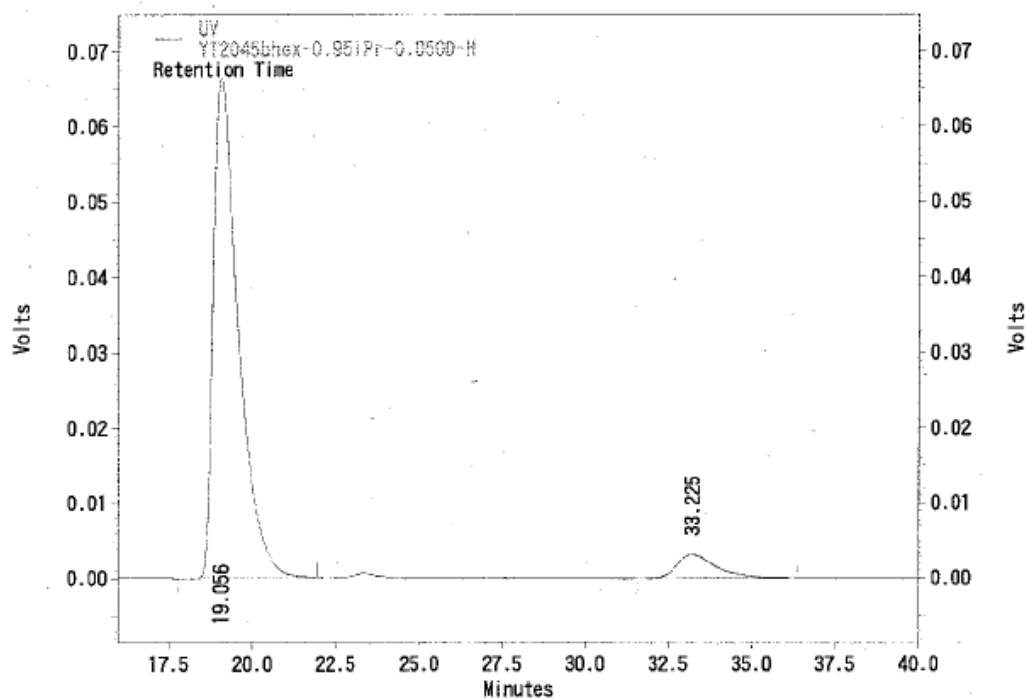

| SPD-20A Results |                |                |              |
|-----------------|----------------|----------------|--------------|
| Retention Time  | Area           | Area %         | Height       |
| 19.056          | 3443457        | 93.091         | 66503        |
| 33.225          | 255565         | 6.909          | 3210         |
| <b>Totals</b>   | <b>3699022</b> | <b>100.000</b> | <b>69713</b> |

## Supporting Information II

R-3b in Table 1, Entry 9 (92% ee, *ent*-1d was used)

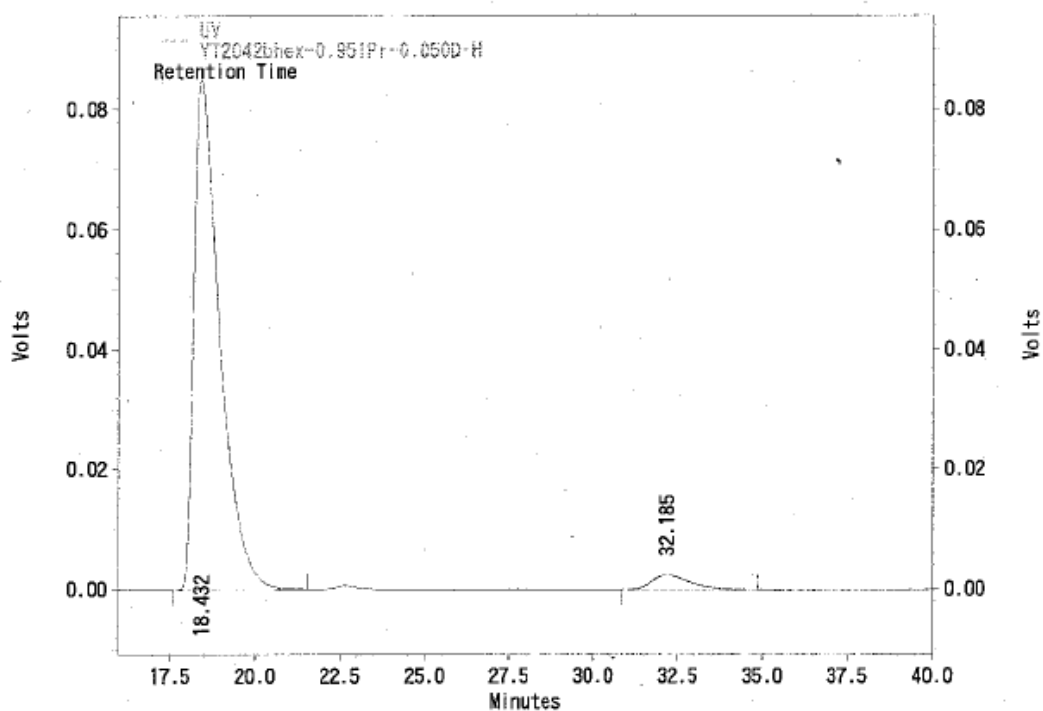

| SPD-20A Results |                |                |              |
|-----------------|----------------|----------------|--------------|
| Retention Time  | Area           | Area %         | Height       |
| 18.432          | 4499703        | 95.876         | 84988        |
| 32.185          | 193551         | 4.124          | 2454         |
| <b>Totals</b>   | <b>4693254</b> | <b>100.000</b> | <b>87442</b> |

R-3b in Table 1, Entry 10 (95% ee, *ent*-1e was used)

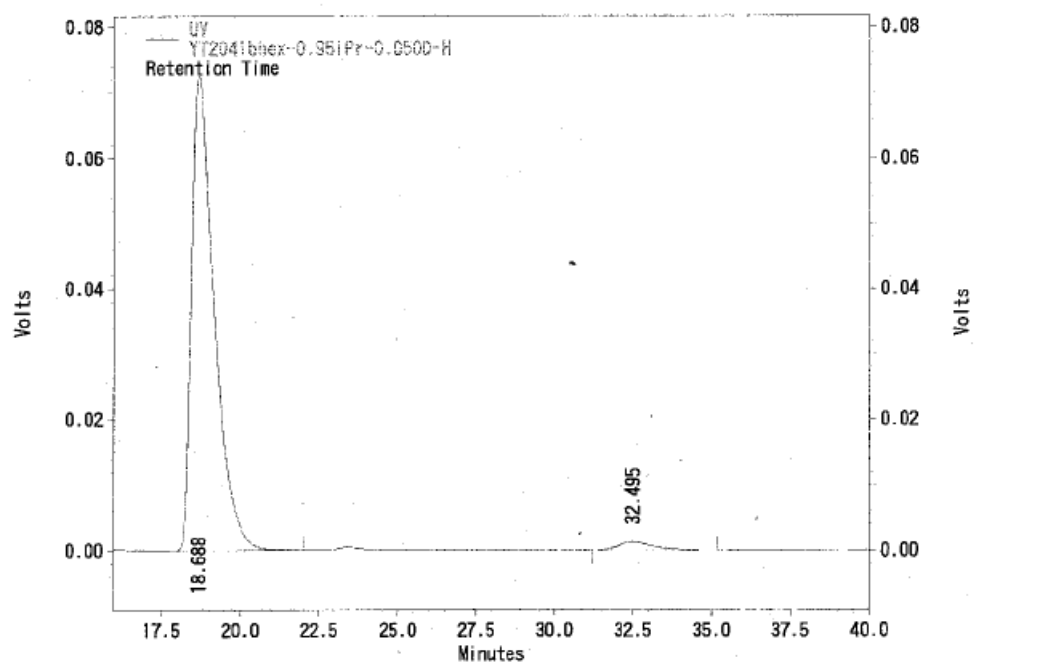

| SPD-20A Results |                |                |              |
|-----------------|----------------|----------------|--------------|
| Retention Time  | Area           | Area %         | Height       |
| 18.688          | 3606491        | 97.333         | 72515        |
| 32.495          | 98805          | 2.667          | 1286         |
| <b>Totals</b>   | <b>3705296</b> | <b>100.000</b> | <b>73801</b> |

## Supporting Information II

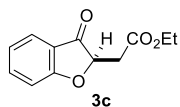

(±)-**3c**

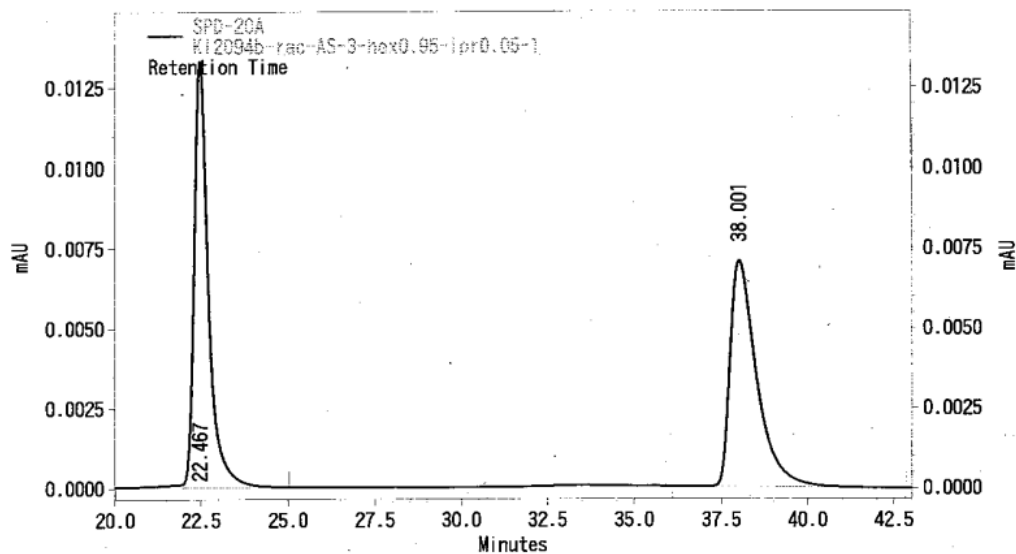

4

| Name          | Retention Time | Area          | Area Percent   | Height       |
|---------------|----------------|---------------|----------------|--------------|
| 1             | 22.467         | 383638        | 50.447         | 13299        |
| 2             | 38.001         | 376832        | 49.553         | 7065         |
| <b>Totals</b> |                | <b>760470</b> | <b>100.000</b> | <b>20364</b> |

v

*S*-**3c** synthesized in the presence of **1a** for 2 h (84% ee)

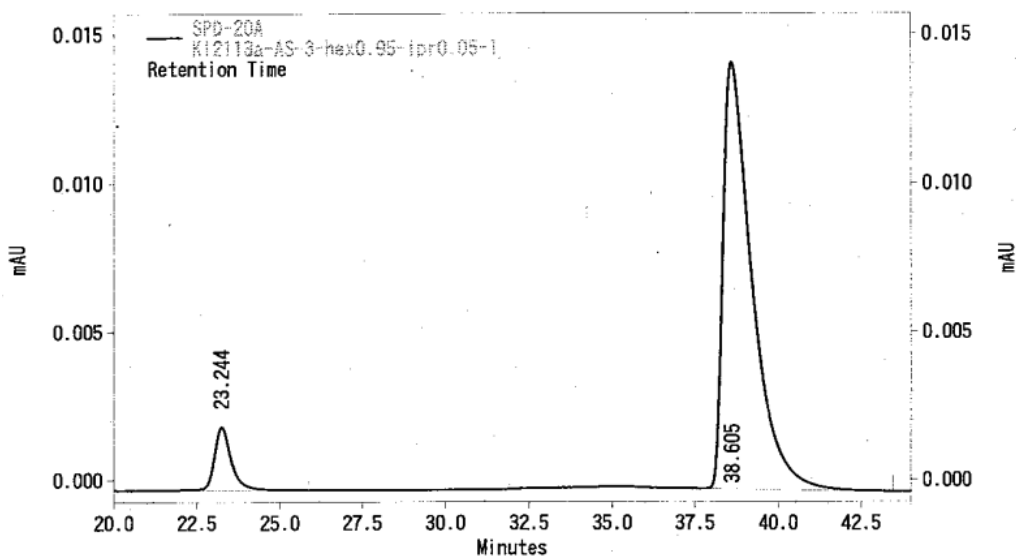

4

| Name          | Retention Time | Area          | Area Percent   | Height       |
|---------------|----------------|---------------|----------------|--------------|
| 1             | 23.244         | 76815         | 8.157          | 2134         |
| 2             | 38.605         | 864849        | 91.843         | 14361        |
| <b>Totals</b> |                | <b>941664</b> | <b>100.000</b> | <b>16495</b> |

v

## Supporting Information II

*S*-**3c** synthesized in the presence of **1a** for 4 h (81% ee)

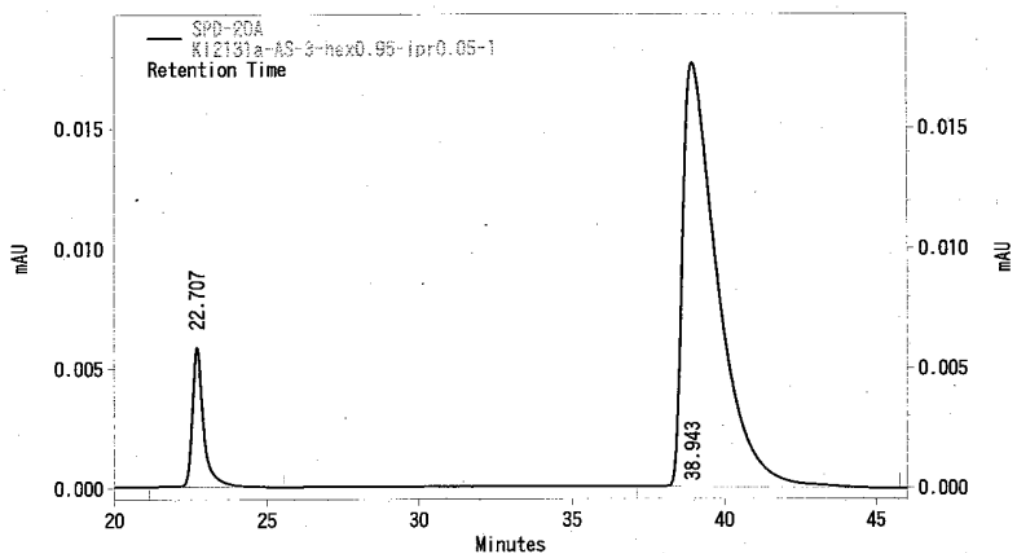

4

| Name   | Retention Time | Area    | Area Percent | Height |
|--------|----------------|---------|--------------|--------|
| 1      | 22.707         | 151430  | 9.701        | 5827   |
| 2      | 38.943         | 1409565 | 90.299       | 17648  |
| Totals |                | 1560995 | 100.000      | 23475  |

v

*R*-**3c** synthesized in the presence of *ent*-**1e** for 2 h (91% ee)

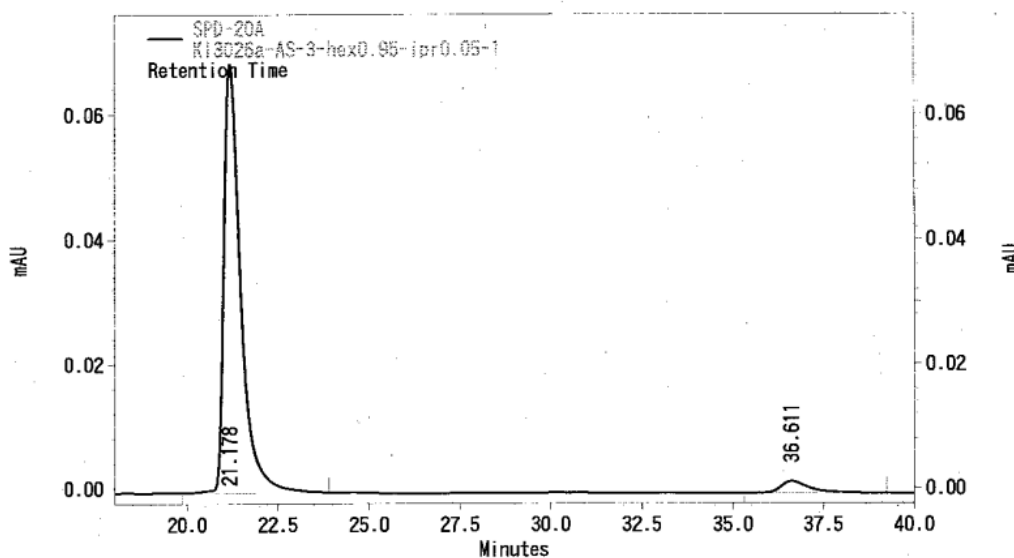

4

| Name   | Retention Time | Area    | Area Percent | Height |
|--------|----------------|---------|--------------|--------|
| 1      | 21.178         | 2218229 | 95.521       | 68789  |
| 2      | 36.611         | 104016  | 4.479        | 1891   |
| Totals |                | 2322245 | 100.000      | 70680  |

v

## Supporting Information II

*R*-3c synthesized in the presence of *ent*-1e for 4 h (90% ee)

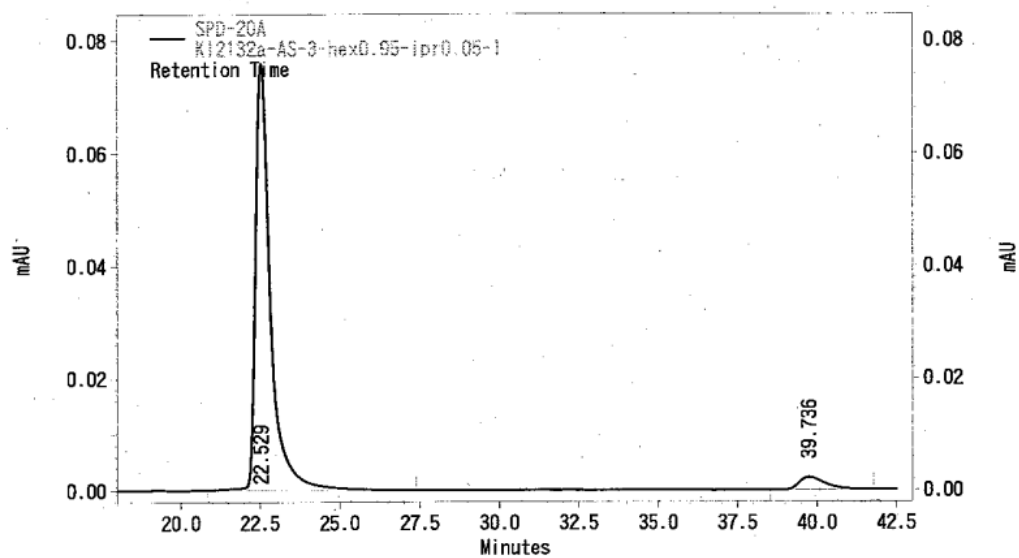

4

| Name   | Retention Time | Area    | Area Percent | Height |
|--------|----------------|---------|--------------|--------|
| 1      | 22.529         | 2479672 | 95.003       | 75808  |
| 2      | 39.736         | 130438  | 4.997        | 2261   |
| Totals |                | 2610110 | 100.000      | 78069  |

v
