# Supplementary material for: Remote electronic effect on the N-heterocyclic carbene-catalyzed asymmetric intramolecular Stetter reaction and structural revision of products
Source: Royal Society of Chemistry journal article supplement (doi:10.1039/d3cc00693j), 2023-01-01
Supplement: d3cc00693j2.pdf [file d3cc00693j2.pdf]

# Remote Electronic Effect on the N-Heterocyclic Carbene-catalyzed Asymmetric Intramolecular Stetter Reaction and Structural Revision of Products

Tsubasa Inokuma,<sup>a,b</sup> Kohei Iritani,<sup>a</sup> Yuki Takahara,<sup>a</sup> Chunzhao Sun,<sup>a</sup> Yousuke Yamaoka,<sup>c</sup> Satoru Kuwano,<sup>c</sup>  
and Ken-ichi Yamada<sup>\*,a,b</sup>

<sup>a</sup>Graduate School of Pharmaceutical Sciences, Tokushima University, Shomachi, Tokushima 770-8505, Japan.

<sup>b</sup>Research Cluster on “Key Material Development”, Tokushima University, Shomachi, Tokushima 770-8505, Japan.

<sup>c</sup>Graduate School of Pharmaceutical Sciences, Kyoto University, Yoshida, Sakyo-ku, Kyoto 606-8501, Japan.

yamak@tokushima-u.ac.jp

## Contents

|                                                                                        |        |
|----------------------------------------------------------------------------------------|--------|
| 1. General procedure .....                                                             | S2     |
| 2. Preparation of the NHC precursors <i>ent-1c</i> and <i>ent-1e</i> .....             | S2–3   |
| 3. Preparation of the substrate <b>2b</b> .....                                        | S4–5   |
| 4. Typical procedure for asymmetric intramolecular Stetter reaction of <b>2a</b> ..... | S5     |
| 5. Typical procedure for asymmetric intramolecular Stetter reaction of <b>2b</b> ..... | S6     |
| 6. Conversion of <b>3a</b> into <b>7</b> .....                                         | S6–8   |
| 7. Typical procedure for asymmetric intramolecular Stetter reaction of <b>2c</b> ..... | S8     |
| 8. X-ray diffraction .....                                                             | S9–12  |
| 9. DFT calculation .....                                                               | S13–30 |
| 10. References.....                                                                    | S31    |

# Supporting Information I

## 1. General procedure

All non-aqueous reactions were carried out under a positive atmosphere of argon in dried glassware. Dehydrated solvents were purchased for the reactions and used without further desiccation. Reagents were purchased and used without further purification, unless otherwise stated. Reactions were monitored by thin-layer chromatography (TLC) carried out on Merck TLC silica gel 60 F<sub>254</sub>. Column chromatography was performed using Kanto Chem. Co. Silica Gel 60N (particle size 0.040–0.050 mm). Nuclear magnetic resonance (NMR) spectra were recorded on a Bruker AV-400N instrument. The chemical shifts ( $\delta$ ) are reported in parts per million relative to tetramethylsilane (0 ppm) for <sup>1</sup>H and CDCl<sub>3</sub> (77.0 ppm), DMSO-*d*<sub>6</sub> (39.5 ppm), or acetone-*d*<sub>6</sub> (206.7 and 30.4 ppm) for <sup>13</sup>C. The coupling constants (*J*) are presented in hertz. The following abbreviations were used to explain NMR peak multiplicities: s = singlet, d = doublet, t = triplet, q = quartet, m = multiplet, br = broad. Mass spectra were recorded on a Waters MICROMASS<sup>®</sup> LCT PREMIERTM (ESI-TOF). IR was measured using a JASCO FT-IR 6200, and the wavenumbers of maximum absorption peaks are reported in cm<sup>-1</sup>. Optical rotations were measured using a JASCO P-2200 polarimeter (concentration in g dL<sup>-1</sup>). High performance liquid chromatography (HPLC) analyses were performed on a SHIMADZU analytical system equipped with two LC-20AT pumps. The catalysts **1a**, **1b**, **2d**<sup>3</sup> and the substrates **2a**, **2c**<sup>5</sup> were prepared according to the literature procedures.

## 2. Preparation of the NHC precursors *ent*-**1c** and *ent*-**1e**

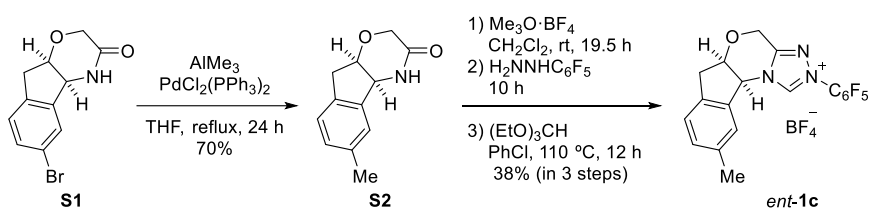

### (4a*S*,9a*R*)-6-Methyl-4,4a,9,9a-tetrahydroindeno[2,1-*b*][1,4]oxazin-3(2*H*)-one (**S2**)

A stirring bar, **S1**<sup>6</sup> (885 mg, 3.30 mmol), and PdCl<sub>2</sub>(PPh<sub>3</sub>)<sub>2</sub> (116 mg, 0.165 mmol) were placed in a dried 200 mL flask. The flask was evacuated and filled with argon three times. Distilled THF (66 mL) was added, and the mixture was stirred at 60 °C for 30 min. A 1.07 M hexane solution of AlMe<sub>3</sub> (5.0 mL, 1.6 mmol) was added and the mixture was heated under reflux in an oil-bath (90 °C) for 24 h. The mixture was then cooled in an ice–water bath and 2 M HCl was dropwise added until bubbling ceased. The mixture was extracted three times with CHCl<sub>3</sub>. The combined organic layers were dried over Na<sub>2</sub>SO<sub>4</sub> and concentrated. Purification of the residue by silica gel column chromatography (CHCl<sub>3</sub>/EtOAc 1:3) gave pale brown solid, which was then recrystallized from hexane–acetone (5:1) to give **S2** (470 mg, 70%) as glossy white solid of mp 248–250 °C: [ $\alpha$ ]<sub>D</sub><sup>28</sup> +12.6 (*c* 1.00, CHCl<sub>3</sub>). <sup>1</sup>H NMR (400 MHz, CDCl<sub>3</sub>):  $\delta$  7.17 (d, *J* = 7.0 Hz, 1H), 7.11–7.09 (m, 2H), 6.60 (m, 1H), 4.74 (dd, *J* = 4.0, 4.0 Hz, 1H), 4.53 (dd, *J* = 4.5, 4.0 Hz, 1H), 4.16 (s, 2H), 3.17 (dd, *J* = 17.0, 4.5 Hz, 1H), 3.05 (d, *J* = 17.0 Hz, 1H), 2.36 (s, 3H). <sup>13</sup>C NMR (100 MHz, CDCl<sub>3</sub>):  $\delta$  169.8 (C), 140.9 (C), 137.3 (C), 136.2 (C), 129.3 (CH), 125.0 (CH), 124.6 (CH), 76.5 (CH), 66.6 (CH<sub>2</sub>), 58.7 (CH), 37.3 (CH<sub>2</sub>), 21.4 (CH<sub>3</sub>). LRMS (ESI) *m/z* 226 (M + Na). HRMS (ESI) *m/z* [M + Na]<sup>+</sup> calcd for C<sub>12</sub>H<sub>13</sub>NNaO<sub>2</sub>, 226.0844; found, 226.0833. IR (KBr): 2922, 1692, 1498, 1417, 1328, 1267, 1109, 1045, 802.

### (5a*S*,10b*R*)-9-Methyl-2-(perfluorophenyl)-5a,10b-dihydro-4*H*,6*H*-indeno[2,1-*b*][1,2,4]triazolo[4,3-*d*][1,4]oxazin-2-ium tetrafluoroborate (*ent*-**1c**)

To a solution of **S2** (102 mg, 0.502 mmol) in distilled CH<sub>2</sub>Cl<sub>2</sub> (5.0 mL) was added Me<sub>3</sub>O·BF<sub>4</sub> (77 mg, 0.51 mmol), and the mixture was stirred at rt for 19.5 h. C<sub>6</sub>F<sub>5</sub>NHNH<sub>2</sub> (103 mg, 0.504 mmol) was then added, and the mixture was stirred for

## Supporting Information I

another 10 h. The mixture was concentrated *in vacuo*, and the residue was dissolved in distilled PhCl (3.0 mL) followed by addition of (EtO)<sub>3</sub>CH (0.43 mL, 2.5 mmol). The mixture was heated at 110 °C and stirred for 12 h open to the atmosphere. The whole mixture was directly purified by column chromatography (CHCl<sub>3</sub>/MeOH 20:1) to give brown solid. The solid was dissolved in hot toluene. The mixture was cooled to rt followed by addition of hexane to give **1c** (91 mg, 38%) as pale brown solid of mp 117–119 °C: [ $\alpha$ ]<sub>D</sub><sup>25</sup> +120 (*c* 1.00, CH<sub>3</sub>CN). **<sup>1</sup>H NMR** (400 MHz, CDCl<sub>3</sub>):  $\delta$  10.7 (s, 1H), 7.26–7.18 (m, 3H), 6.02 (d, *J* = 4.5 Hz, 1H), 5.11–5.06 (m, 3H), 3.35 (dd, *J* = 17.0, 4.5 Hz, 1H), 3.21 (d, *J* = 17.0 Hz, 1H), 2.36 (s, 3 H). **<sup>13</sup>C NMR** (100 MHz, acetone-d<sub>6</sub>):  $\delta$  152.5 (C), 147.1 (CH), 138.5 (C), 138.0 (C), 136.1 (C), 131.2 (CH), 126.1 (CH), 125.5 (CH), 78.3 (CH), 63.3 (CH), 60.7 (CH<sub>2</sub>), 37.4 (CH<sub>2</sub>), 21.1 (CH<sub>3</sub>). **LRMS** (ESI) *m/z* 394 (M – BF<sub>4</sub>). **HRMS** (ESI) *m/z* [M – BF<sub>4</sub>]<sup>+</sup> calcd for C<sub>19</sub>H<sub>13</sub>F<sub>5</sub>N<sub>3</sub>O, 394.0979; found, 394.0982. **IR** (KBr): 2948, 1594, 1525, 1483, 1390, 1324, 1077, 1005, 861, 824, 801.

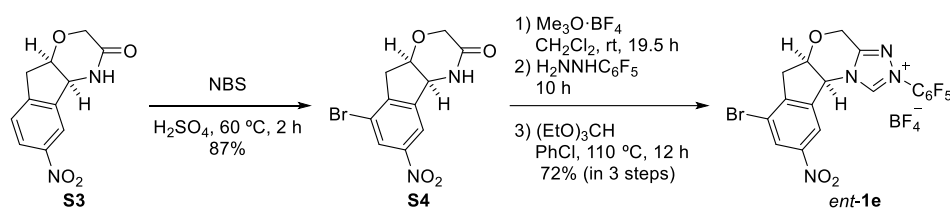

### (4aR,9aS)-8-Bromo-6-nitro-4,4a,9,9a-tetrahydroindeno[2,1-b][1,4]oxazin-3(2H)-one (**S4**)

To a solution of **S3**<sup>7</sup> (468 mg, 2.0 mmol) in H<sub>2</sub>SO<sub>4</sub> (2.0 mL) was added NBS (360 mg, 2.02 mmol) in three additions at 60 °C. After stirred for 2 h, the reaction mixture was poured into ice water. The resulting mixture was filtered, washed with cold water and hexane. Solvent was concentrated under reduced pressure to give the title compound **S4** (544 mg, 1.74 mmol, 87%) as a light brown powder of mp 246–252 °C: [ $\alpha$ ]<sub>D</sub><sup>29</sup> +77.96 (*c* 0.14, CHCl<sub>3</sub>). **<sup>1</sup>H NMR** (400 MHz, CDCl<sub>3</sub>):  $\delta$  8.35 (d, *J* = 1.5 Hz, 1H), 8.19 (s, 1H), 4.89 (t, *J* = 4.0 Hz, 1H), 4.62 (m, 1H), 4.20 (s, 2H), 3.23 (m, 2H). **<sup>13</sup>C NMR** (125 MHz, acetone-d<sub>6</sub>):  $\delta$  167.1 (C), 148.6 (C), 148.1 (C), 146.0 (C), 126.1 (CH), 119.5 (C), 118.6 (CH), 75.4 (CH), 66.3 (CH<sub>2</sub>), 59.2 (CH), 39.0 (CH<sub>2</sub>). **LRMS** (ESI) *m/z* 335 (M + Na). **HRMS** (ESI) *m/z* [M + Na]<sup>+</sup> calcd for C<sub>11</sub>H<sub>9</sub>BrN<sub>2</sub>NaO<sub>4</sub>, 334.9643; found, 334.9654. **IR** (KBr): 3442, 3087, 2911, 1691, 1631, 1531, 1347.

### (5aS,10bR)-7-Bromo-9-nitro-2-(perfluorophenyl)-5a,10b-dihydro-4H,6H-indeno[2,1-b][1,2,4]triazolo[4,3-d][1,4]oxazin-2-ium tetrafluoroborate (**1e**)

To a solution of **S4** (157 mg, 0.501 mmol) in CH<sub>2</sub>Cl<sub>2</sub> (10 mL) was added Me<sub>3</sub>O·BF<sub>4</sub> (84 mg, 0.55 mmol), and the mixture was stirred at rt for 19.5 h. C<sub>6</sub>F<sub>5</sub>NHNH<sub>2</sub> (112 g, 0.551 mmol) was then added, and the mixture was stirred for another 10 h. The mixture was concentrated *in vacuo*, and the residue was dissolved in distilled PhCl (3.0 mL) followed by addition of (EtO)<sub>3</sub>CH (0.86 mL, 5.0 mmol). The mixture was heated at 110 °C and stirred for 12 h open to the atmosphere. The whole mixture was directly purified by column chromatography (CHCl<sub>3</sub>/MeOH 20:1) to give brown solid. The solid was triturated in Et<sub>2</sub>O and collected by filtration to give **1e** (212 mg, 72%) as pale brown solid of mp 147–149 °C: [ $\alpha$ ]<sub>D</sub><sup>20</sup> +135 (*c* 1.00, CHCl<sub>3</sub>). **<sup>1</sup>H NMR** (400 MHz, CDCl<sub>3</sub>):  $\delta$  10.7 (s, 1H), 8.33 (s, 1H), 8.25 (s, 1H), 6.34 (d, *J* = 4.0 Hz, 1H), 5.15 (dd, *J* = 4.5, 4.0 Hz, 1H), 5.12 (s, 2H), 3.42 (dd, *J* = 18.5, 4.5 Hz, 1H), 3.34 (d, *J* = 18.5 Hz, 1H). **<sup>13</sup>C NMR** (100 MHz, CDCl<sub>3</sub>):  $\delta$  150.7 (C), 148.5 (C), 148.2 (C), 146.2 (CH), 138.2 (C), 128.3 (CH), 120.9 (C), 119.2 (CH), 76.5 (CH), 62.8 (CH), 60.4 (CH<sub>2</sub>), 39.1 (CH<sub>2</sub>). **LRMS** (ESI) *m/z* 503 (M – BF<sub>4</sub>). **HRMS** (ESI) *m/z* [M – BF<sub>4</sub>]<sup>+</sup> calcd for C<sub>18</sub>H<sub>9</sub>BrF<sub>5</sub>N<sub>4</sub>O<sub>3</sub>, 502.9778; found, 502.9780. **IR** (KBr): 2943, 1593, 1529, 1483, 1447, 1351, 1079, 1004, 893, 862, 843, 756.

# Supporting Information I

## 3. Preparation of the substrate **2b**

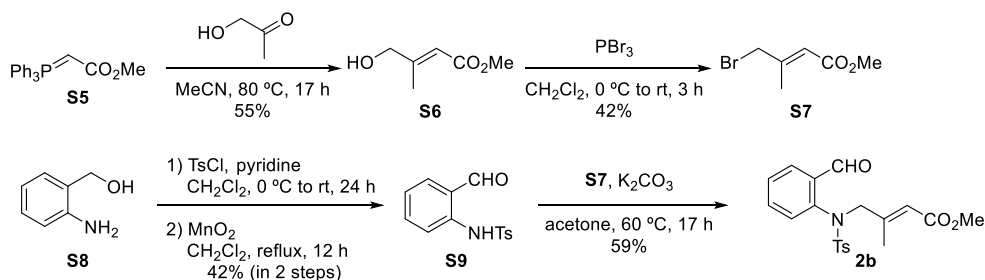

### Methyl (*E*)-4-hydroxy-3-methylbut-2-enoate (**S6**)

To a solution of **S5** (44.3 g, 132 mmol) in MeCN (235 mL) was added hydroxyacetone (7.7 mL, 0.11 mol). The obtained solution was stirred at 80 °C for 17 h. After this time solvent was evaporated and the residue was treated with diethyl ether (200 mL) and cooled down to 0 °C. Precipitated triphenylphosphine oxide was filtered off. The solvent was evaporated under reduced pressure. The crude product was distilled (160 °C at 7 mmHg) to give the title compound **S6** (7.9 g, 61 mmol, 55%). <sup>1</sup>H NMR (400 MHz, CDCl<sub>3</sub>): δ 6.01–5.99 (m, 1H), 4.16 (dd, *J* = 6.0, 1.0 Hz, 2H), 3.72 (s, 3H), 2.10 (d, *J* = 1.0 Hz, 3H). <sup>13</sup>C NMR (125 MHz, CDCl<sub>3</sub>): δ 167.5 (C), 158.1 (C), 113.0 (CH), 66.8 (CH<sub>2</sub>), 51.0 (CH<sub>3</sub>), 15.6 (CH<sub>3</sub>). LRMS (ESI) *m/z*: 153 (M + Na). HRMS (ESI) *m/z* [M + Na]<sup>+</sup> calcd for C<sub>6</sub>H<sub>10</sub>NaO<sub>3</sub>, 153.0528; found, 153.0522. IR (neat): 3443, 2952, 1719, 1659, 1438, 1227, 1151.

### Methyl (*E*)-4-bromo-3-methylbut-2-enoate (**S7**)

To a solution of **S6** (7.9 g, 61 mmol) in CH<sub>2</sub>Cl<sub>2</sub> (180 mL) was added dropwise a solution of PBr<sub>3</sub> (6.9 mL, 73 mmol) in CH<sub>2</sub>Cl<sub>2</sub> (64 mL) at 0 °C. After stirring at room temperature for 3 h, the reaction was quenched with water, and the whole solution was extracted with ethyl acetate twice. The combined organic layers were dried over Na<sub>2</sub>SO<sub>4</sub>. The solvent was evaporated, and the residue was purified by flash column chromatography (hexane/ethyl acetate 19:1) to give the title compound **S7** (5.7 g, 26 mmol, 42%). <sup>1</sup>H NMR (400 MHz, CDCl<sub>3</sub>): δ 5.97 (m 1H), 3.95 (d, *J* = 1.0 Hz, 2H), 3.72 (s, 3H), 2.28 (d, *J* = 1.0 Hz, 3H). <sup>13</sup>C NMR (100 MHz, CDCl<sub>3</sub>): δ 166.3 (C), 152.7 (C), 119.0 (CH), 51.3 (CH<sub>3</sub>), 38.1 (CH<sub>2</sub>), 17.2 (CH<sub>3</sub>). LRMS (ESI) *m/z*: 215 (M + Na). HRMS (ESI) *m/z* [M + Na]<sup>+</sup> calcd for C<sub>6</sub>H<sub>9</sub>BrNaO<sub>2</sub>, 214.9684; found, 214.9691. IR (neat): 1720, 1646, 1435, 1360, 1287, 1232, 1159, 1037.

### *N*-(2-Formylphenyl)-4-methylbenzenesulfonamide (**S9**)

To a solution of **S8** (1.2 g, 10 mmol) in CHCl<sub>3</sub> (33 mL) at 0 °C were added pyridine (1.0 mL, 13 mmol) and TsCl (2.3 g, 12 mmol) and the reaction mixture was stirred under an argon atmosphere. After 22 h, the reaction mixture was diluted with ethyl acetate, washed with saturated aqueous NH<sub>4</sub>Cl, water, and then dried over Na<sub>2</sub>SO<sub>4</sub>. The organic solvent was removed under reduced pressure and the obtained crude product was used to the next step without further purification.

The above-obtained crude product (3.0 g, 10 mmol) was dissolved in CH<sub>2</sub>Cl<sub>2</sub> (23 mL). MnO<sub>2</sub> (3.5 g, 40 mmol) was added under argon atmosphere and the solution was refluxed for 12 h. The progress of the reaction was monitored by TLC analysis. After completion, the reaction mixture was filtered off with Celite<sup>®</sup> and the filtrate was concentrated under reduced pressure. The crude product was purified by flash column chromatography (hexane/ethyl acetate 3:1) to give the title compound **S9** (1.16 g, 4.21 mmol, 2 steps 42%). <sup>1</sup>H NMR (300 MHz, CDCl<sub>3</sub>): δ 10.8 (s, 1H), 9.83 (s, 1H), 7.77 (d, *J* = 8.0 Hz, 2H), 7.69 (d, *J* = 8.0 Hz, 1H), 7.59 (dd, *J* = 8.0, 1.0 Hz, 1H), 7.51 (td, *J* = 8.0, 1.0 Hz, 1H), 7.24 (d, *J* = 8.0 Hz, 2H), 7.16 (td, *J* = 8.0, 1.0 Hz, 1H), 2.37 (s, 3H). The <sup>1</sup>H NMR data of **S9** was in good agreement with that of the literature.<sup>8</sup>

## Supporting Information I

### Methyl (*E*)-4-((*N*-(2-formylphenyl)-4-methylphenyl)sulfonamido)-3-methylbut-2-enoate (**2b**)

A round bottom flask was charged with **S9** (1.2 g, 4.2 mmol) and  $K_2CO_3$  (1.5 g, 11 mmol) under argon atmosphere. To this flask was added acetone (28 mL). After 10 min, **S7** (0.69 mL, 5.0 mmol) was added, and the resulting solution was stirred at 60 °C for 17 h. After this time, solvent was evaporated. The residue was diluted with ethyl acetate, washed with saturated aqueous  $Na_2S_2O_3$ , water, brine, and then dried over  $Na_2SO_4$ . The solvent was concentrated under reduced pressure. The crude product was purified by flash column chromatography (hexane/ethyl acetate 2:1 and then 1:2) to give the title compound **2b** (955 mg, 2.5 mmol, 59%) as white solid of mp 108–118 °C.  $^1H$  NMR (400 MHz, DMSO- $d_6$ , 80 °C):  $\delta$  10.26 (s, 1H), 7.87 (dd,  $J = 7.5, 2.0$  Hz, 1H), 7.60 (ddd,  $J = 9.5, 7.5, 1.5$  Hz, 1H), 7.52 (m, 1H), 7.46–7.38 (m, 4H), 7.01 (d,  $J = 8.0$  Hz, 1H), 5.72 (s, 1H), 4.34 (s, 2H), 3.56 (s, 3H), 2.43 (s, 3H), 2.06 (s, 3H).  $^{13}C$  NMR (125 MHz,  $CDCl_3$ ):  $\delta$  189.3 (CH), 165.9 (C), 151.2 (C), 144.6 (C), 140.8 (C), 135.7 (C), 134.0 (CH), 133.5 (C), 129.8 (CH), 129.0 (CH), 128.7 (CH), 128.1 (CH), 127.1 (CH), 119.9 (CH), 59.0 ( $CH_2$ ), 51.2 ( $CH_3$ ), 21.6 ( $CH_3$ ), 17.1 ( $CH_3$ ). LRMS (ESI)  $m/z$ : 410 (M + Na). HRMS (ESI)  $m/z$  [M + Na] $^+$  calcd for  $C_{20}H_{21}NNaO_5S$ , 410.1038; found, 410.1056. IR (KBr): 2952, 1722, 1690, 1597, 1347, 1227, 1159.

### 4. Typical procedure for asymmetric intramolecular Stetter reaction of **2a** (Table 1, entry 2)

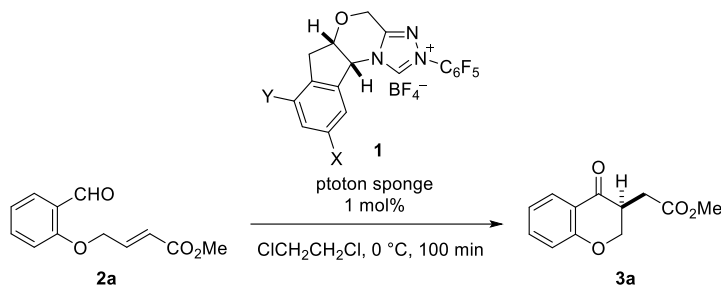

A flame-dried round bottom flask was charged with triazolium salt **1a** (2.3 mg, 5.0  $\mu$ mol, 1 mol%), proton sponge (1.1 mg, 5.0  $\mu$ mol, 1 mol%), and a magnetic stirring bar under argon. To this flask was added  $ClCH_2CH_2Cl$  (20 mL) via syringe, and the mixture was stirred at ambient temperature for 1 h and then cooled in an ice–brine bath. After 15 min, the substrate **2a** (110 mg, 0.50 mmol) was added, and the resulting mixture was stirred at 0 °C for 100 min. Acetic acid (1.0 mL) was added, and the reaction mixture was stirred at 0 °C for 10 min. The reaction mixture was diluted with ethyl acetate, washed with  $H_2O$  twice, saturated aqueous  $NaHCO_3$ , brine, and then dried over  $Na_2SO_4$ . The solvent was concentrated under reduced pressure. The mixture was purified by silica gel flash column chromatography (hexane/ethyl acetate = 5:1) to give the title compound **3a** (58.6 mg, 53%) with 96% ee as light yellow oil:  $[\alpha]_D^{19} -9.38$  ( $c$  1.14,  $CHCl_3$ ).  $^1H$  NMR (400 MHz,  $CDCl_3$ ):  $\delta$  7.89 (d,  $J = 8.0$  Hz, 1H), 7.48 (t,  $J = 8.0$  Hz, 1H), 7.03 (t,  $J = 8.0$  Hz, 1H), 6.98 (d,  $J = 8.0$  Hz, 1H), 4.60 (dd,  $J = 11.0, 5.5$  Hz, 1H), 4.30 (dd,  $J = 12.0, 11.0$  Hz, 1H), 3.74 (s, 3H), 3.34 (ddt,  $J = 12.0, 8.0, 5.0$  Hz, 1H), 2.95 (dd,  $J = 17.0, 5.0$  Hz, 1H), 2.41 (dd,  $J = 17.0, 8.0$  Hz, 1H).  $^{13}C$  NMR (100 MHz,  $CDCl_3$ ):  $\delta$  192.5 (C), 171.8 (C), 161.7 (C), 136.0 (CH), 127.4 (CH), 121.5 (CH), 120.5 (C), 117.8 (CH), 70.2 ( $CH_2$ ), 52.0 ( $CH_3$ ), 42.5 (CH), 30.1 ( $CH_2$ ). LRMS (ESI)  $m/z$ : 243 (M + Na). HRMS (ESI)  $m/z$  [M + Na] $^+$  calcd for  $C_{12}H_{12}NaO_4$ , 243.0633; found, 243.0645. IR (neat): 2952, 1738, 1692, 1606, 1480, 1325, 1301, 1216.

The ee was determined by HPLC analysis (Daicel Chiralcel AD-H; hexane/*i*-PrOH 19:1; 1.0 mL/min; 254 nm; (*S*) 12.2 min, (*R*) 15.3 min).

## Supporting Information I

### 5. Typical procedure for asymmetric intramolecular Stetter reaction of **2b** (Table 2, entry 2)

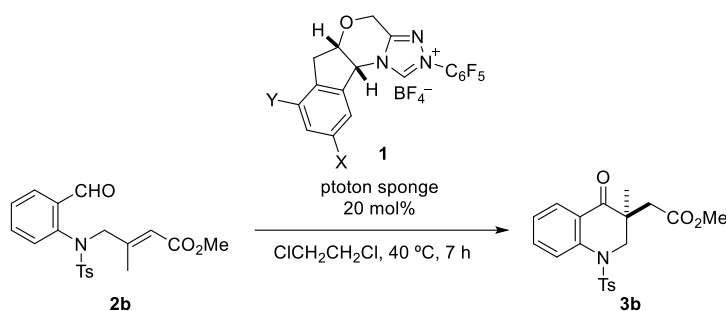

A flame-dried test tube was charged with triazolium salt **1a** (4.7 mg, 0.010 mmol, 20 mol%), proton sponge (2.3 mg, 0.010 mmol, 20 mol%), and a magnetic stirring bar under argon. To this flask was added ClCH<sub>2</sub>CH<sub>2</sub>Cl (1.0 mL) via syringe. After 1 h at rt, the substrate **2b** (19 mg, 0.050 mmol) was added, and the resulting mixture was stirred at 40 °C for 7 h. Acetic acid (0.5 mL) was added, and the reaction mixture was stirred 10 min at rt. The reaction mixture was diluted with ethyl acetate, washed with H<sub>2</sub>O twice, saturated aqueous NaHCO<sub>3</sub>, brine, and then dried over Na<sub>2</sub>SO<sub>4</sub>. The solvent was concentrated under reduced pressure. The crude product was purified by flash column chromatography (hexane/ethyl acetate 3:1) to give the title compound **3b** (10.1 mg, 52%) with 78% ee as a yellow solid of mp 99–103 °C.  $[\alpha]_D^{16} -35.4$  ( $c = 1.01$ , CHCl<sub>3</sub>). **<sup>1</sup>H NMR** (400 MHz, CDCl<sub>3</sub>): δ 8.03 (dd,  $J = 8.0, 1.5$  Hz, 1H), 7.82 (d,  $J = 8.5$  Hz, 2H), 7.54 (d,  $J = 8.5$  Hz, 1H), 7.42 (ddd,  $J = 8.5, 7.5, 1.5$  Hz, 1H), 7.35 (d,  $J = 8.5$  Hz, 2H), 7.12 (ddd,  $J = 8.0, 7.5, 1.0$  Hz, 1H), 4.27 (d,  $J = 1.0$ , 2H), 3.67 (s, 3H), 3.04 (d,  $J = 17.0$  Hz, 1H), 2.55 (d,  $J = 17.0$  Hz, 1H), 2.44 (s, 3H), 1.36 (s, 3H). **<sup>13</sup>C NMR** (100 MHz, CDCl<sub>3</sub>): δ 196.1 (C), 171.2 (C), 144.4 (C), 142.3 (C), 137.3 (C), 134.5 (CH), 130.1 (CH), 129.2 (CH), 126.8 (CH), 123.6 (CH), 122.2 (C), 118.8 (CH), 54.7 (CH<sub>2</sub>), 51.8 (CH<sub>3</sub>), 44.8 (C), 39.2 (CH<sub>2</sub>), 21.6 (CH<sub>3</sub>), 20.7 (CH<sub>3</sub>). **LRMS** (ESI)  $m/z$ : 410 (M + Na). **HRMS** (ESI)  $m/z$  [M + Na]<sup>+</sup> calcd for C<sub>20</sub>H<sub>21</sub>NNaO<sub>5</sub>S, 410.1038; found, 410.1052. **IR** (KBr) 1743, 1696, 1602, 1481, 1342, 1163. The ee was determined by HPLC analysis (Daicel Chiralcel OD-H; hexane/*i*-PrOH 17:3; 1.0 mL/min; 254 nm; (*R*) 13.8 min, (*S*) 25.9 min).

### 6. Conversion of **3a** into **7**

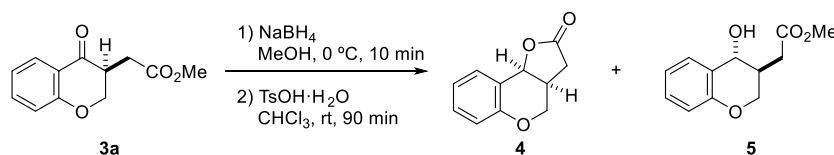

#### (3*aS*,9*bS*)-3*a*,9*b*-Dihydro-4*H*-furo[3,2-*c*]chromen-2(3*H*)-one (**4**) and Methyl 2-((3*S*,4*R*)-4-hydroxychroman-3-yl)acetate (**5**)

To a solution of **3a** (176 mg, 0.80 mmol, 96% ee) in MeOH (4.0 mL) was slowly added NaBH<sub>4</sub> (30 mg, 0.80 mmol) at 0 °C, and then stirred for 10 min. The reaction mixture was diluted with ethyl acetate, washed with brine, and then dried over Na<sub>2</sub>SO<sub>4</sub>. The solvent was concentrated under reduced pressure. The crude mixture was diluted with CHCl<sub>3</sub> (4.0 mL), and TsOH·H<sub>2</sub>O (8.0 mg) was added. After stirred for 90 min at room temperature, the solvent was concentrated under reduced pressure. The resulting mixture was purified by silica gel column chromatography (CHCl<sub>3</sub>/acetone = 20/1 and then 10/1) to obtain the lactone **4** (59 mg, 0.31 mmol, 39%) as a white solid and the alcohol **5** (91 mg, 0.41 mmol, 51%) as colorless oil.

## Supporting Information I

### (3a*S*,9b*S*)-3a,9b-Dihydro-4*H*-furo[3,2-*c*]chromen-2(3*H*)-one (4)

<sup>1</sup>H NMR (400 MHz, CDCl<sub>3</sub>): δ 7.41 (dd, *J* = 7.5, 1.5 Hz, 1H), 7.29 (ddd, *J* = 8.5, 7.5, 1.5 Hz, 1H), 7.03 (td, *J* = 7.5, 1.0 Hz, 1H), 6.92 (d, *J* = 8.5 Hz, 1H), 5.49 (d, *J* = 6.5, 1H), 4.22 (dd, *J* = 11.5, 4.5, 1H), 3.83 (dd, *J* = 11.5, 9.5, 1H), 3.02 (m, 1H), 2.87 (dd, *J* = 17.5, 8.5, 1H), 2.46 (dd, *J* = 17.5, 4.0, 1H). [α]<sub>D</sub><sup>28</sup> +102.23 (*c* 1.02, CHCl<sub>3</sub>).

The <sup>1</sup>H NMR data of 4 was in good agreement with that of the literature.<sup>9</sup>

### Methyl 2-((3*S*,4*R*)-4-hydroxychroman-3-yl)acetate (5)

<sup>1</sup>H NMR (400 MHz, CDCl<sub>3</sub>): δ 7.34 (dd, *J* = 7.5, 1.5 Hz, 1H), 7.22 (m, 1H), 6.95 (td, *J* = 7.5, 1.0 Hz, 1H), 6.84 (d, *J* = 8.5, 1H), 4.51 (m, 1H), 4.33 (dd, *J* = 11.0, 2.5 Hz, 1H), 4.08 (dd, *J* = 11.0, 5.0 Hz, 1H), 3.70 (s, 3H), 2.49 (m, 1H), 2.40-2.36 (m, 2H), 2.13 (m, 1H). [α]<sub>D</sub><sup>20</sup> = +37.70 (*c* 1.06, CHCl<sub>3</sub>).

The <sup>1</sup>H NMR data of 5 was in good agreement with that of the literature.<sup>10</sup>

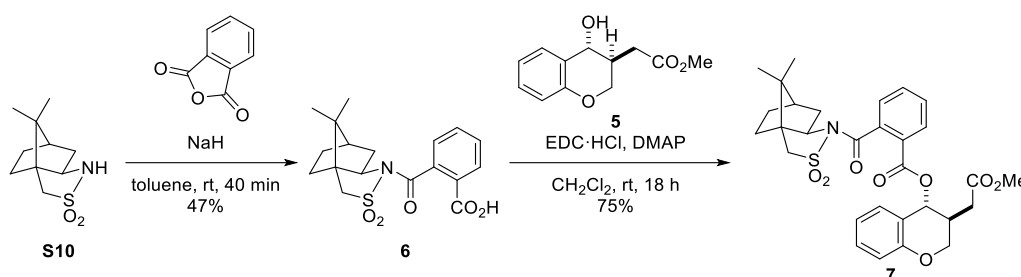

### 2-((6*R*,7a*R*)-8,8-Dimethyl-2,2-dioxidohexahydro-3*H*-3a,6-methanobenzo[*c*]isothiazole-1-carbonyl)benzoic acid (6)

To a solution of S10 (0.40 g, 1.8 mmol) and freshly distilled toluene (6.0 mL) was added 60% NaH in paraffin liquid (0.16 g, 4.0 mmol), and then the mixture was stirred at room temperature. After 30 min, phthalic anhydride (0.27 g, 1.8 mmol) was added, and the resulting mixture was stirred at room temperature for 1 h. The reaction mixture was quenched with 2M HCl to pH 1-2, and was decanted. The white solid was diluted with CHCl<sub>3</sub> and washed with H<sub>2</sub>O. The solvent was concentrated under reduced pressure. The resulting mixture was recrystallized from CHCl<sub>3</sub>/hexane to obtain the title compound 6 (0.32 g, 0.87 mmol, 47%) as a white solid of mp 195–211 °C. <sup>1</sup>H NMR (400 MHz, CDCl<sub>3</sub>): δ 8.10 (dd, *J* = 7.5, 1.5 Hz, 1H), 7.66 (td, *J* = 7.5, 1.0 Hz, 1H), 7.57 (td, *J* = 7.5, 1.5 Hz, 1H), 7.49 (dd, *J* = 7.5, 1.0 Hz, 1H), 4.08 (m, 1H), 3.41 (d, *J* = 2.0 Hz, 2H), 2.49–2.39 (m, 1H), 2.21–2.08 (m, 1H), 1.93 (m, 3H), 1.49–1.37 (m, 2H), 1.22 (s, 3H), 0.96 (s, 3H). <sup>13</sup>C NMR (100 MHz, CDCl<sub>3</sub>): δ 170.2 (C), 167.5 (C), 136.0 (C), 132.9 (CH), 130.6 (CH), 130.4 (CH), 129.3 (CH), 127.6 (C), 65.7 (CH), 53.0 (CH<sub>2</sub>), 48.4 (C), 47.8 (C), 44.7 (CH), 37.7 (CH<sub>2</sub>), 33.1 (CH<sub>2</sub>), 26.5 (CH<sub>2</sub>), 20.3 (CH<sub>3</sub>), 20.0 (CH<sub>3</sub>). LRMS (ESI) *m/z*: 362 (M – H). HRMS (ESI) *m/z* [M – H] calcd for C<sub>18</sub>H<sub>20</sub>NO<sub>5</sub>S, 362.1062; found, 362.1080. IR (KBr) 2950, 2687, 2554, 1684, 1333, 1315, 1302, 1255, 1169, 1154.

### (3*S*,4*R*)-3-(2-Methoxy-2-oxoethyl)chroman-4-yl methanobenzo[*c*]isothiazole-1-carbonyl)benzoate (7)

### 2-((6*R*,7a*R*)-8,8-dimethyl-2,2-dioxidohexahydro-3*H*-3a,6-

To the mixture of alcohol 5 (44 mg, 0.20 mmol), EDC · HCl (58 mg, 0.30 mmol), and DMAP (59 mg, 0.48 mmol) in CH<sub>2</sub>Cl<sub>2</sub> (2.0 mL) was added the carboxylic acid 6 (80 mg, 0.22 mmol), and then the mixture was stirred at room temperature for 18 h. The resulting mixture was added H<sub>2</sub>O and 2M HCl to pH 3-4. The reaction mixture was extracted with CH<sub>2</sub>Cl<sub>2</sub> three times, washed with brine, and then dried over Na<sub>2</sub>SO<sub>4</sub>. The solvent was concentrated under reduced pressure. The mixture was purified by silica gel flash column chromatography (CHCl<sub>3</sub>/acetone = 30:1 and then Hex/EtOAc = 2/1) to obtain the title compound 7 as white solid of mp 83–98 °C. [α]<sub>D</sub><sup>20</sup> +16.95 (*c* = 0.89, CHCl<sub>3</sub>). <sup>1</sup>H NMR (400 MHz, CDCl<sub>3</sub>): δ 8.06 (dd, *J* = 7.5, 1.0 Hz, 1H), 7.59 (td, *J* = 7.5, 1.0 Hz, 1H), 7.52 (td, *J* = 7.5, 1.0 Hz, 1H), 7.41 (dd, *J* = 7.5, 1.0 Hz, 1H), 7.32 (dd, *J* = 7.5, 1.0 Hz, 1H), 7.25 (m, 1H), 6.94–6.88 (m, 2H), 5.86 (s, 1H), 4.42 (dd, *J* = 11.5, 2.5 Hz, 1H), 4.26 (ddd, *J* = 11.5, 3.0, 1.0

## Supporting Information I

Hz, 1H), 3.71–3.61 (m, 4H), 3.37 (d,  $J = 13.5$  Hz, 1H), 3.21 (d,  $J = 13.5$  Hz, 1H), 2.71 (m, 1H), 2.51–2.34 (m, 3H), 2.18–2.05 (m, 1H), 1.93–1.80 (m, 3H), 1.37–1.20 (m, 5H), 0.96 (s, 3H).  $^{13}\text{C}$  NMR (100 MHz,  $\text{CDCl}_3$ ):  $\delta$  171.8 (C), 167.4 (C), 164.3 (C), 155.0 (C), 135.5 (C), 132.2 (CH), 132.1 (CH), 131.7 (CH), 130.5 (CH), 130.2 (CH), 129.0 (CH), 128.3 (C), 120.8 (CH), 118.1 (C), 116.8 (CH), 69.9 (CH), 65.5 (CH), 65.0 ( $\text{CH}_2$ ), 52.9 ( $\text{CH}_2$ ), 51.9 ( $\text{CH}_3$ ), 48.2 (C), 47.6 (C), 45.0 (CH), 37.9 ( $\text{CH}_2$ ), 34.1 (CH), 32.8 ( $\text{CH}_2$ ), 32.4 ( $\text{CH}_2$ ), 26.3 ( $\text{CH}_2$ ), 21.1 ( $\text{CH}_3$ ), 20.0 ( $\text{CH}_3$ ). **LRMS** (ESI)  $m/z$ : 590 (M + Na). **HRMS** (ESI)  $m/z$   $[\text{M} + \text{Na}]^+$  calcd for  $\text{C}_{30}\text{H}_{33}\text{NNaO}_8\text{S}$ , 590.1825; found, 590.1828. **IR** (KBr) 2955, 1717, 1684, 1584, 1490, 1336, 1301, 1227, 1170, 1138, 1077.

The single crystal of **7** for X-ray crystallography analysis was obtained by slow evaporation from acetone/hexane. The Absolute stereochemistry was determined *S* by X-ray crystallography analysis.

### 7. Typical procedure for asymmetric intramolecular Stetter reaction of **2c** (Scheme 3, entry 3)

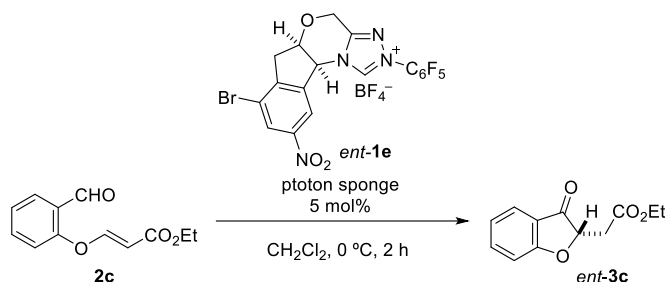

A flame-dried round bottom flask was charged with triazolium salt *ent-1e* (2.3 mg, 5.0  $\mu\text{mol}$ , 5 mol%), proton sponge (1.1 mg, 5.0  $\mu\text{mol}$ , 5 mol%), and a magnetic stirring bar under argon atmosphere. To this flask was added  $\text{CH}_2\text{Cl}_2$  (6.0 mL) via syringe, and the mixture was stirred at ambient temperature for 1 h and then cooled in an ice–brine bath. After 15 min, A solution of the substrate **2c** (22 mg, 0.10 mmol) in  $\text{CH}_2\text{Cl}_2$  (1.5 mL) cooled at 0 °C was added via cannula then  $\text{CH}_2\text{Cl}_2$  (0.5 mL) was also added via cannula. The resulting mixture was stirred at 0 °C for 2 h. The reaction mixture was purified directly by silica gel flash column chromatography (hexane/ethyl acetate = 1:1) at 5 °C to give the title compound *ent-3c* (25 mg, quant) with 91% ee as yellow oil:  $[\alpha]_{\text{D}}^{27} -60.83$  ( $c$  2.06,  $\text{CHCl}_3$ ).  $^1\text{H}$  NMR (400 MHz,  $\text{CDCl}_3$ ):  $\delta$  7.69 (ddd,  $J = 7.5, 1.5, 0.5$  Hz, 1H), 7.62 (ddd,  $J = 8.5, 7.0, 1.5$  Hz, 1H), 7.15–7.09 (m, 2H), 4.88 (dd,  $J = 4.0, 8.0$  Hz, 1H), 4.19–4.11 (m, 2H), 3.08 (dd,  $J = 4.0, 17$  Hz, 1H), 2.83 (dd,  $J = 8.0, 17$  Hz, 1H), 1.18 (t,  $J = 7.0$  Hz, 3H).  $^{13}\text{C}$  NMR (100 MHz,  $\text{CDCl}_3$ ):  $\delta$  200.3 (C), 172.5 (C), 169.3 (C), 138.0 (CH), 124.3 (CH), 122.2 (CH), 120.9 (C), 113.5 (CH), 81.1 (CH), 61.2 ( $\text{CH}_2$ ), 36.1 ( $\text{CH}_2$ ), 14.0 ( $\text{CH}_3$ ). **LRMS** (ESI)  $m/z$ : 243 (M + Na). **HRMS** (ESI)  $m/z$   $[\text{M} + \text{Na}]^+$  calcd for  $\text{C}_{12}\text{H}_{12}\text{NaO}_4$ , 243.0633; found, 243.0623. **IR** (neat) 3026, 1724, 1616, 1477, 1463.

The ee was determined by HPLC analysis (Daicel Chiralcel AS-3; hexane/*i*-PrOH 19:1; 1.0 mL/min; 254 nm; (*R*) 21.2 min, (*S*) 36.6 min).



## Supporting Information I

### 8. X-ray diffraction

**Preparation of 3b for X-ray diffraction analysis:** A flame-dried test tube was charged with triazolium salt **1d** (5.1 mg, 0.010 mmol), proton sponge (2.2 mg, 0.010 mmol), and a magnetic stirring bar under argon. To this flask was added ClCH<sub>2</sub>CH<sub>2</sub>Cl (1.0 mL) via syringe. After 1 h at rt, the substrate **2b** (19 mg, 0.050 mmol) was added, and the resulting mixture was stirred at 40 °C for 24 h. Acetic acid (0.5 mL) was added, and the reaction mixture was stirred 10 min at rt. The reaction mixture was diluted with ethyl acetate, washed with H<sub>2</sub>O twice, saturated aqueous NaHCO<sub>3</sub>, brine, and then dried over Na<sub>2</sub>SO<sub>4</sub>. The solvent was concentrated under reduced pressure. The crude product was purified by flash column chromatography (hexane/ethyl acetate 3:1) to give the title compound **3b** (19.8 mg, 97%) with 94% ee. The single crystal of **3b** for X-ray crystallography analysis was obtained by slow evaporation from *i*-PrOH/hexane. The Absolute stereochemistry was determined *S* by X-ray crystallography analysis.

**Data collection and Structure solution details:** Single crystal X-ray data for compounds **3b** and **7** were collected on a Rigaku XtaLaB P200 diffractometer Cu-K $\alpha$  radiation. Data collection, cell refinement, data reduction and analysis were carried out with the CrysAlisPro (Rigaku Oxford Diffraction). These structures were solved by intrinsic phasing methods with the SHELXT program and refined using SHELXL<sup>11</sup> with anisotropic displacement parameters for non-H atoms. CCDC 2208224 (for **3b**) and 2208225 (for **7**) contains the supplementary crystallographic data for this paper. These data can be obtained free of charge from the Cambridge Crystallographic Data Centre via [http://www.ccdc.cam.ac.uk/data\\_request/cif](http://www.ccdc.cam.ac.uk/data_request/cif).

X-ray crystallographic data for compound **3b** (CCDC 2208224).

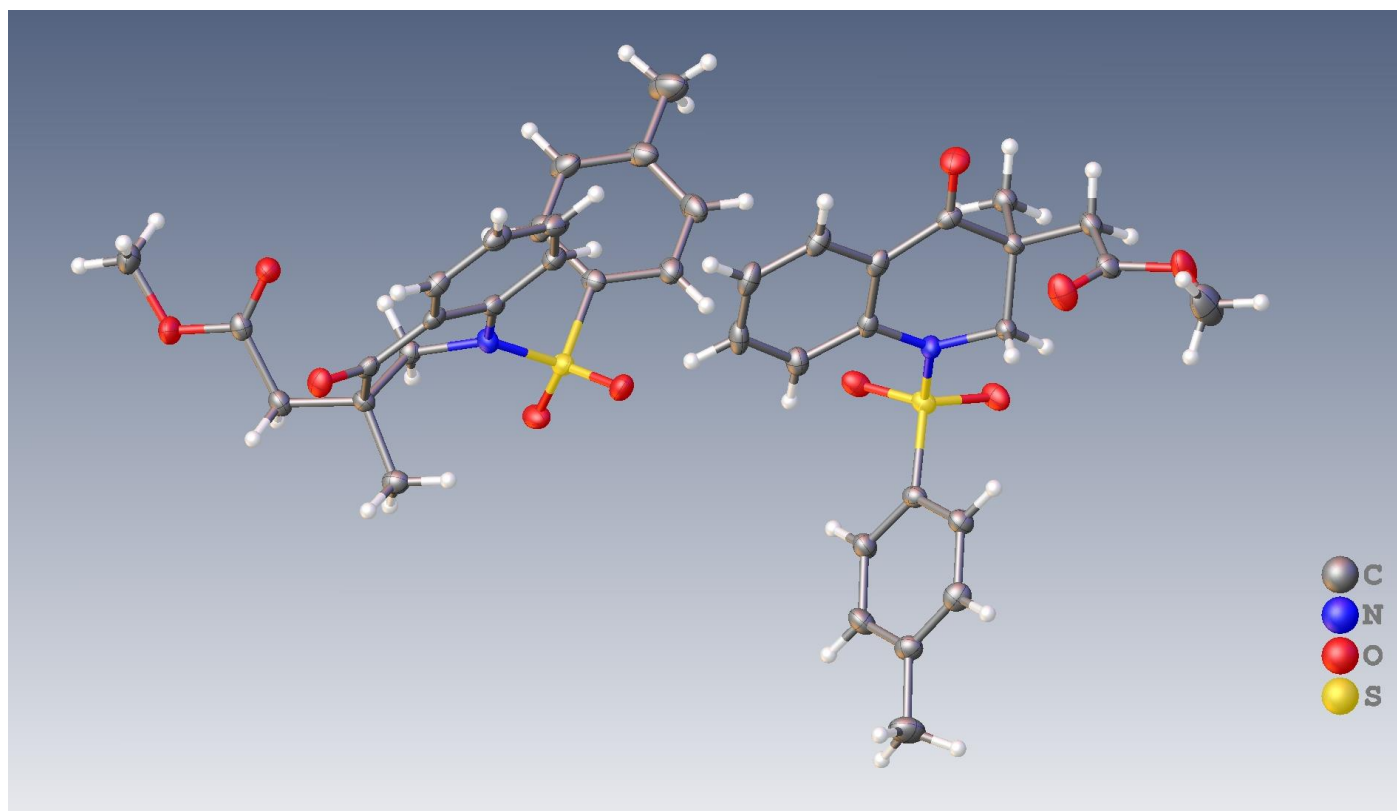

**Figure S1.** ORTEP view of the compound **3b** with thermal ellipsoids drawn at the 50% probability level

## Supporting Information I

**Table S1 Crystal data and structure refinement for 3b.**

|                                             |                                                               |
|---------------------------------------------|---------------------------------------------------------------|
| Identification code                         | 3b                                                            |
| Empirical formula                           | C <sub>20</sub> H <sub>21</sub> NO <sub>5</sub> S             |
| Formula weight                              | 387.44                                                        |
| Temperature/K                               | 93                                                            |
| Crystal system                              | monoclinic                                                    |
| Space group                                 | P2 <sub>1</sub>                                               |
| a/Å                                         | 9.21970(10)                                                   |
| b/Å                                         | 9.6414(2)                                                     |
| c/Å                                         | 21.4651(2)                                                    |
| α/°                                         | 90                                                            |
| β/°                                         | 100.6270(10)                                                  |
| γ/°                                         | 90                                                            |
| Volume/Å <sup>3</sup>                       | 1875.32(5)                                                    |
| Z                                           | 4                                                             |
| ρ <sub>calc</sub> /cm <sup>3</sup>          | 1.372                                                         |
| μ/mm <sup>-1</sup>                          | 1.808                                                         |
| F(000)                                      | 816.0                                                         |
| Crystal size/mm <sup>3</sup>                | 0.02 × 0.01 × 0.01                                            |
| Radiation                                   | Cu Kα (λ = 1.54184)                                           |
| 2Θ range for data collection/°              | 8.382 to 146.47                                               |
| Index ranges                                | -11 ≤ h ≤ 11, -9 ≤ k ≤ 11, -24 ≤ l ≤ 26                       |
| Reflections collected                       | 24711                                                         |
| Independent reflections                     | 6656 [R <sub>int</sub> = 0.0906, R <sub>sigma</sub> = 0.0517] |
| Data/restraints/parameters                  | 6656/1/493                                                    |
| Goodness-of-fit on F <sup>2</sup>           | 1.040                                                         |
| Final R indexes [I ≥ 2σ (I)]                | R <sub>1</sub> = 0.0416, wR <sub>2</sub> = 0.1075             |
| Final R indexes [all data]                  | R <sub>1</sub> = 0.0423, wR <sub>2</sub> = 0.1079             |
| Largest diff. peak/hole / e Å <sup>-3</sup> | 0.49/-0.50                                                    |
| Flack parameter                             | 0.033(10)                                                     |

## Supporting Information I

X-ray crystallographic data for compound 7 (CCDC2208225).

**Figure S2.** ORTEP view of the compound 7 with thermal ellipsoids drawn at the 50% probability level

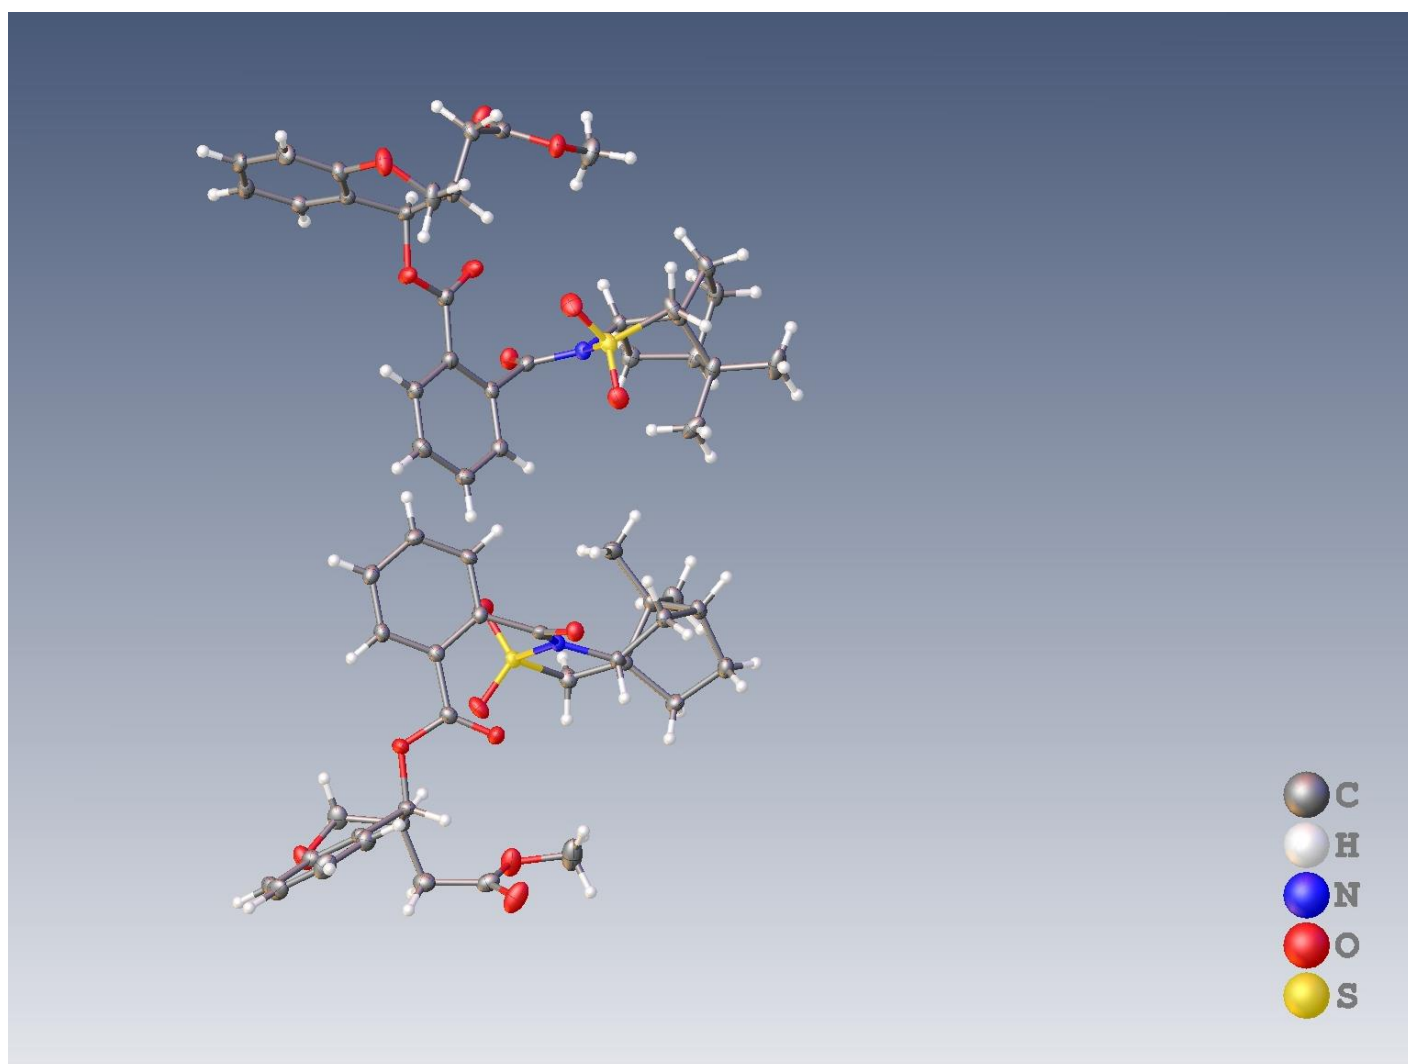

## Supporting Information I

**Table S2 Crystal data and structure refinement for 7.**

|                                             |                                                               |
|---------------------------------------------|---------------------------------------------------------------|
| Identification code                         | 7                                                             |
| Empirical formula                           | C <sub>30</sub> H <sub>33</sub> NO <sub>8</sub> S             |
| Formula weight                              | 567.63                                                        |
| Temperature/K                               | 93.00                                                         |
| Crystal system                              | monoclinic                                                    |
| Space group                                 | P2 <sub>1</sub>                                               |
| a/Å                                         | 12.4269(3)                                                    |
| b/Å                                         | 11.0986(2)                                                    |
| c/Å                                         | 20.8157(5)                                                    |
| α/°                                         | 90                                                            |
| β/°                                         | 107.341(2)                                                    |
| γ/°                                         | 90                                                            |
| Volume/Å <sup>3</sup>                       | 2740.44(11)                                                   |
| Z                                           | 4                                                             |
| ρ <sub>calc</sub> /cm <sup>3</sup>          | 1.376                                                         |
| μ/mm <sup>-1</sup>                          | 1.502                                                         |
| F(000)                                      | 1200.0                                                        |
| Crystal size/mm <sup>3</sup>                | 0.1 × 0.1 × 0.1                                               |
| Radiation                                   | Cu Kα (λ = 1.54184)                                           |
| 2Θ range for data collection/°              | 4.448 to 144.112                                              |
| Index ranges                                | -14 ≤ h ≤ 15, -13 ≤ k ≤ 12, -22 ≤ l ≤ 24                      |
| Reflections collected                       | 20845                                                         |
| Independent reflections                     | 8222 [R <sub>int</sub> = 0.0346, R <sub>sigma</sub> = 0.0390] |
| Data/restraints/parameters                  | 8222/1/727                                                    |
| Goodness-of-fit on F <sup>2</sup>           | 1.086                                                         |
| Final R indexes [I ≥ 2σ (I)]                | R <sub>1</sub> = 0.0303, wR <sub>2</sub> = 0.0782             |
| Final R indexes [all data]                  | R <sub>1</sub> = 0.0330, wR <sub>2</sub> = 0.0794             |
| Largest diff. peak/hole / e Å <sup>-3</sup> | 0.16/-0.29                                                    |
| Flack parameter                             | 0.034(10)                                                     |

# Supporting Information I

## 9. DFT calculation

The initial transition state (TS) search was conducted using Spartan'18W program at the B3LYP/6-31G(d) theoretical level. After conformational search, the geometry optimization of the conformers at the HF/3-21G theoretical level was performed with restriction of the forming C–C bond lengths. Finally, TS search was performed at the B3LYP/6-31G(d) levels of theory using Gaussian 09W program<sup>11</sup> to give the TS<sub>major</sub> and TS<sub>minor</sub>. The TS geometries were verified by vibrational frequency analysis. Single-point-energy calculations were performed at the B3LYP-D3/6-311+G(2df,2p) theoretical level. The NCI plots<sup>12</sup> were visualized using a Java application, Jmol, downloaded from <http://www.jmol.org/>.

### TS<sub>major</sub> that gives 3a by the catalysis of 1a

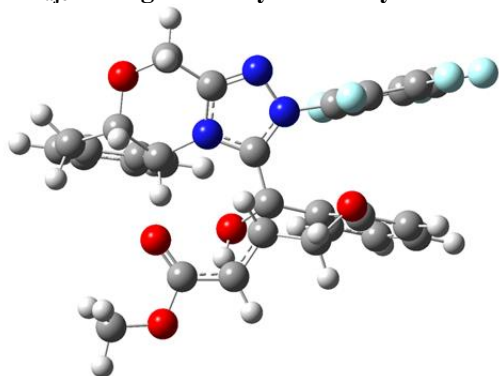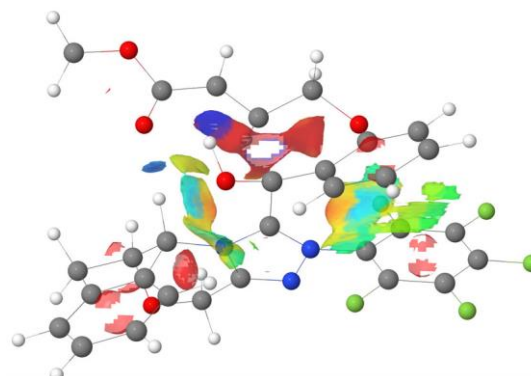

NCI plot of TS<sub>major</sub>

|                                               |                             |
|-----------------------------------------------|-----------------------------|
| Energies (RB3LYP) =                           | -2195.85217976              |
| Zero-point correction =                       | 0.479310 (Hartree/Particle) |
| Thermal correction to Energy =                | 0.514386                    |
| Thermal correction to Enthalpy =              | 0.515330                    |
| Thermal correction to Gibbs Free Energy =     | 0.411694                    |
| Energies (B3LYP-D3) =                         | -2196.69893438              |
| Sum of electronic and zero-point Energies =   | -2196.219624                |
| Sum of electronic and thermal Energies =      | -2196.184548                |
| Sum of electronic and thermal Enthalpies =    | -2196.183604                |
| Sum of electronic and thermal Free Energies = | -2196.287240                |

| Atomic | Coordinates (Angstroms) |           |           |
|--------|-------------------------|-----------|-----------|
| Type   | X                       | Y         | Z         |
| H      | 0.523966                | 0.228996  | 3.211294  |
| C      | 1.341831                | 0.733942  | 2.707550  |
| C      | 3.411797                | 2.083198  | 1.402686  |
| C      | 1.162197                | 1.141387  | 1.378463  |
| C      | 2.546496                | 0.968888  | 3.368701  |
| C      | 3.586943                | 1.632100  | 2.710551  |
| C      | 2.201309                | 1.842904  | 0.749734  |
| H      | 2.675721                | 0.634031  | 4.393978  |
| H      | 4.527506                | 1.816406  | 3.222694  |
| H      | 4.188171                | 2.632982  | 0.879281  |
| O      | 2.035938                | 2.295114  | -0.538169 |
| C      | 0.879997                | 3.154002  | -0.654521 |
| H      | 0.973614                | 3.955006  | 0.089243  |
| H      | 0.965454                | 3.597901  | -1.650609 |
| C      | -0.466476               | 2.467679  | -0.514691 |
| C      | -1.491573               | 3.225818  | 0.111334  |
| H      | -1.232827               | 4.041716  | 0.780054  |
| C      | -2.856760               | 3.133848  | -0.321602 |
| O      | -3.334267               | 2.300810  | -1.104017 |
| C      | -0.128058               | 0.877558  | 0.652382  |
| C      | -0.181969               | -0.226184 | -0.283474 |
| N      | 0.833021                | -0.810377 | -0.992759 |
| N      | -1.319636               | -0.753528 | -0.850810 |

## Supporting Information I

|   |           |           |           |
|---|-----------|-----------|-----------|
| C | -0.926386 | -1.562567 | -1.893495 |
| N | 0.362918  | -1.635896 | -2.007915 |
| C | 2.225213  | -0.844216 | -0.743250 |
| C | 4.977882  | -1.050890 | -0.340488 |
| C | 2.729986  | -1.520328 | 0.370267  |
| C | 3.115346  | -0.302208 | -1.673337 |
| C | 4.488781  | -0.398318 | -1.470879 |
| C | 4.100178  | -1.607624 | 0.588353  |
| C | -2.741493 | -0.608712 | -0.472950 |
| H | -2.924385 | 0.449920  | -0.284458 |
| C | -1.933314 | -2.153631 | -2.838158 |
| C | -3.651413 | -1.033674 | -1.653811 |
| H | -3.709984 | -0.250608 | -2.420353 |
| O | -1.239235 | 0.885333  | 1.481229  |
| H | -1.624107 | 1.810829  | 1.355530  |
| H | -0.786475 | 1.948355  | -1.417923 |
| F | 1.888937  | -2.071901 | 1.248878  |
| F | 4.577288  | -2.240446 | 1.663427  |
| F | 6.293770  | -1.138932 | -0.143633 |
| F | 5.340111  | 0.130021  | -2.354462 |
| F | 2.657440  | 0.316566  | -2.757789 |
| C | -3.238608 | -1.488336 | 0.663499  |
| C | -4.987699 | -1.348894 | -0.969164 |
| H | -5.569878 | -2.059332 | -1.564407 |
| H | -5.575914 | -0.427024 | -0.869266 |
| C | -4.553897 | -1.882565 | 0.380811  |
| O | -3.198708 | -2.265341 | -2.232493 |
| H | -1.618203 | -3.153783 | -3.145370 |
| C | -2.618474 | -1.872454 | 1.847955  |
| H | -1.606031 | -1.557025 | 2.073457  |
| C | -5.266884 | -2.660456 | 1.287829  |
| H | -6.285938 | -2.971343 | 1.070483  |
| C | -3.331335 | -2.667233 | 2.751699  |
| H | -2.858031 | -2.982336 | 3.677732  |
| C | -4.645574 | -3.054344 | 2.477224  |
| H | -5.187076 | -3.671006 | 3.189744  |
| H | -1.977432 | -1.516325 | -3.738147 |
| O | -3.646134 | 4.098781  | 0.246733  |
| C | -5.024456 | 4.057709  | -0.121135 |
| H | -5.489080 | 3.115108  | 0.187250  |
| H | -5.149630 | 4.168153  | -1.202698 |
| H | -5.493763 | 4.894251  | 0.400327  |
| H | 0.523966  | 0.228996  | 3.211294  |
| C | 1.341831  | 0.733942  | 2.707550  |
| C | 3.411797  | 2.083198  | 1.402686  |
| C | 1.162197  | 1.141387  | 1.378463  |
| C | 2.546496  | 0.968888  | 3.368701  |
| C | 3.586943  | 1.632100  | 2.710551  |
| C | 2.201309  | 1.842904  | 0.749734  |
| H | 2.675721  | 0.634031  | 4.393978  |
| H | 4.527506  | 1.816406  | 3.222694  |
| H | 4.188171  | 2.632982  | 0.879281  |
| O | 2.035938  | 2.295114  | -0.538169 |
| C | 0.879997  | 3.154002  | -0.654521 |
| H | 0.973614  | 3.955006  | 0.089243  |
| H | 0.965454  | 3.597901  | -1.650609 |
| C | -0.466476 | 2.467679  | -0.514691 |
| C | -1.491573 | 3.225818  | 0.111334  |
| H | -1.232827 | 4.041716  | 0.780054  |
| C | -2.856760 | 3.133848  | -0.321602 |
| O | -3.334267 | 2.300810  | -1.104017 |
| C | -0.128058 | 0.877558  | 0.652382  |
| C | -0.181969 | -0.226184 | -0.283474 |

## Supporting Information I

|   |           |           |           |
|---|-----------|-----------|-----------|
| N | 0.833021  | -0.810377 | -0.992759 |
| N | -1.319636 | -0.753528 | -0.850810 |
| C | -0.926386 | -1.562567 | -1.893495 |
| N | 0.362918  | -1.635896 | -2.007915 |
| C | 2.225213  | -0.844216 | -0.743250 |
| C | 4.977882  | -1.050890 | -0.340488 |
| C | 2.729986  | -1.520328 | 0.370267  |
| C | 3.115346  | -0.302208 | -1.673337 |
| C | 4.488781  | -0.398318 | -1.470879 |
| C | 4.100178  | -1.607624 | 0.588353  |
| C | -2.741493 | -0.608712 | -0.472950 |
| H | -2.924385 | 0.449920  | -0.284458 |
| C | -1.933314 | -2.153631 | -2.838158 |
| C | -3.651413 | -1.033674 | -1.653811 |
| H | -3.709984 | -0.250608 | -2.420353 |
| O | -1.239235 | 0.885333  | 1.481229  |
| H | -1.624107 | 1.810829  | 1.355530  |
| H | -0.786475 | 1.948355  | -1.417923 |
| F | 1.888937  | -2.071901 | 1.248878  |
| F | 4.577288  | -2.240446 | 1.663427  |
| F | 6.293770  | -1.138932 | -0.143633 |
| F | 5.340111  | 0.130021  | -2.354462 |
| F | 2.657440  | 0.316566  | -2.757789 |
| C | -3.238608 | -1.488336 | 0.663499  |
| C | -4.987699 | -1.348894 | -0.969164 |
| H | -5.569878 | -2.059332 | -1.564407 |
| H | -5.575914 | -0.427024 | -0.869266 |
| C | -4.553897 | -1.882565 | 0.380811  |
| O | -3.198708 | -2.265341 | -2.232493 |
| H | -1.618203 | -3.153783 | -3.145370 |
| C | -2.618474 | -1.872454 | 1.847955  |
| H | -1.606031 | -1.557025 | 2.073457  |
| C | -5.266884 | -2.660456 | 1.287829  |
| H | -6.285938 | -2.971343 | 1.070483  |
| C | -3.331335 | -2.667233 | 2.751699  |
| H | -2.858031 | -2.982336 | 3.677732  |
| C | -4.645574 | -3.054344 | 2.477224  |
| H | -5.187076 | -3.671006 | 3.189744  |
| H | -1.977432 | -1.516325 | -3.738147 |
| O | -3.646134 | 4.098781  | 0.246733  |
| C | -5.024456 | 4.057709  | -0.121135 |
| H | -5.489080 | 3.115108  | 0.187250  |
| H | -5.149630 | 4.168153  | -1.202698 |
| H | -5.493763 | 4.894251  | 0.400327  |

---

# Supporting Information I

TS<sub>minor</sub> that gives 3a by the catalysis of 1a

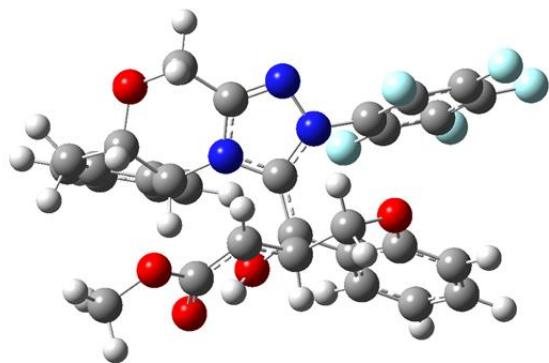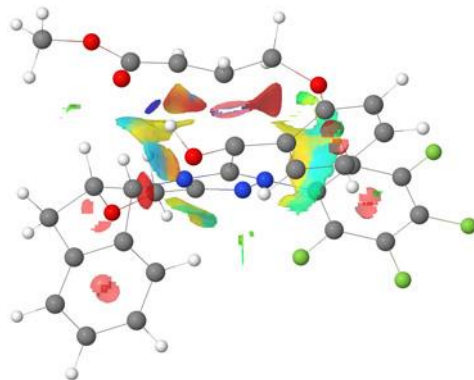

NCI plot of TS<sub>minor</sub>

|                                               |                             |
|-----------------------------------------------|-----------------------------|
| Energies (RB3LYP) =                           | -2195.84703001              |
| Zero-point correction =                       | 0.479292 (Hartree/Particle) |
| Thermal correction to Energy =                | 0.514621                    |
| Thermal correction to Enthalpy =              | 0.515565                    |
| Thermal correction to Gibbs Free Energy =     | 0.412010                    |
| Energies (B3LYP-D3) =                         | -2196.69577236              |
| Sum of electronic and zero-point Energies =   | -2196.216480                |
| Sum of electronic and thermal Energies =      | -2196.181151                |
| Sum of electronic and thermal Enthalpies =    | -2196.180207                |
| Sum of electronic and thermal Free Energies = | -2196.283762                |

| Atomic Type | Coordinates (Angstroms) |           |           |
|-------------|-------------------------|-----------|-----------|
|             | X                       | Y         | Z         |
| H           | 0.612860                | -0.163271 | 3.402482  |
| C           | 1.421335                | 0.405242  | 2.955536  |
| C           | 3.450736                | 1.936170  | 1.805374  |
| C           | 1.218986                | 0.962534  | 1.684266  |
| C           | 2.628274                | 0.576857  | 3.629074  |
| C           | 3.648017                | 1.336690  | 3.047136  |
| C           | 2.237212                | 1.759094  | 1.133551  |
| H           | 2.773218                | 0.123281  | 4.605374  |
| H           | 4.591480                | 1.476543  | 3.567961  |
| H           | 4.215174                | 2.552084  | 1.341737  |
| O           | 2.118095                | 2.310705  | -0.114323 |
| C           | 0.907089                | 3.007649  | -0.476611 |
| H           | 0.786160                | 2.808786  | -1.545112 |
| H           | 1.102528                | 4.081428  | -0.352717 |
| C           | -0.359054               | 2.663014  | 0.277668  |
| C           | -1.563273               | 2.894272  | -0.423686 |
| H           | -1.564389               | 3.055389  | -1.496763 |
| C           | -2.793123               | 2.985492  | 0.278783  |
| O           | -2.989745               | 2.634796  | 1.463050  |
| C           | -0.095439               | 0.821640  | 0.984097  |
| C           | -0.227721               | 0.025851  | -0.200367 |
| N           | 0.719012                | -0.296371 | -1.146940 |
| N           | -1.428397               | -0.219364 | -0.835387 |
| C           | -1.133467               | -0.622763 | -2.121744 |
| N           | 0.139141                | -0.690224 | -2.351518 |
| C           | 2.088264                | -0.582201 | -0.961182 |
| C           | 4.798094                | -1.210713 | -0.675617 |
| C           | 3.046680                | 0.022617  | -1.779389 |
| C           | 2.506828                | -1.519178 | -0.011879 |
| C           | 3.855270                | -1.820684 | 0.148889  |
| C           | 4.394782                | -0.289570 | -1.641539 |
| C           | -2.781259               | -0.410306 | -0.268507 |
| H           | -2.992870               | 0.432204  | 0.387043  |
| C           | -2.236366               | -0.822863 | -3.116388 |



## Supporting Information I

|   |           |           |           |
|---|-----------|-----------|-----------|
| C | -3.841661 | -0.464443 | -1.400491 |
| H | -4.091341 | 0.538354  | -1.773767 |
| O | -1.163245 | 0.636913  | 1.867300  |
| H | -1.744769 | 1.442608  | 1.878263  |
| H | -0.361083 | 3.004633  | 1.314827  |
| F | 1.607007  | -2.130486 | 0.767361  |
| F | 4.243784  | -2.711501 | 1.065685  |
| F | 6.092027  | -1.504527 | -0.537365 |
| F | 5.306603  | 0.297428  | -2.422474 |
| F | 2.675861  | 0.918522  | -2.692539 |
| O | -3.404682 | -1.296172 | -2.480555 |
| H | -1.940781 | -1.560887 | -3.864933 |
| C | -5.015787 | -1.210854 | -0.747689 |
| H | -5.619860 | -1.714169 | -1.509016 |
| H | -5.666741 | -0.500903 | -0.218915 |
| C | -3.015626 | -1.718826 | 0.469615  |
| C | -4.322503 | -2.153739 | 0.215157  |
| C | -2.177609 | -2.424476 | 1.326511  |
| H | -1.166143 | -2.085380 | 1.525031  |
| C | -2.664404 | -3.591148 | 1.924907  |
| H | -2.021608 | -4.161684 | 2.589632  |
| C | -3.969152 | -4.027116 | 1.677716  |
| H | -4.332445 | -4.935966 | 2.150001  |
| C | -4.809234 | -3.308027 | 0.821446  |
| H | -5.820675 | -3.655032 | 0.624377  |
| H | -2.428265 | 0.135520  | -3.628851 |
| O | -3.826930 | 3.470716  | -0.473496 |
| C | -5.082064 | 3.584492  | 0.201571  |
| H | -5.789502 | 3.936039  | -0.551936 |
| H | -5.022052 | 4.302326  | 1.025190  |
| H | -5.405602 | 2.620983  | 0.607946  |
| H | 0.612860  | -0.163271 | 3.402482  |
| C | 1.421335  | 0.405242  | 2.955536  |
| C | 3.450736  | 1.936170  | 1.805374  |
| C | 1.218986  | 0.962534  | 1.684266  |
| C | 2.628274  | 0.576857  | 3.629074  |
| C | 3.648017  | 1.336690  | 3.047136  |
| C | 2.237212  | 1.759094  | 1.133551  |
| H | 2.773218  | 0.123281  | 4.605374  |
| H | 4.591480  | 1.476543  | 3.567961  |
| H | 4.215174  | 2.552084  | 1.341737  |
| O | 2.118095  | 2.310705  | -0.114323 |
| C | 0.907089  | 3.007649  | -0.476611 |
| H | 0.786160  | 2.808786  | -1.545112 |
| H | 1.102528  | 4.081428  | -0.352717 |
| C | -0.359054 | 2.663014  | 0.277668  |
| C | -1.563273 | 2.894272  | -0.423686 |
| H | -1.564389 | 3.055389  | -1.496763 |
| C | -2.793123 | 2.985492  | 0.278783  |
| O | -2.989745 | 2.634796  | 1.463050  |
| C | -0.095439 | 0.821640  | 0.984097  |
| C | -0.227721 | 0.025851  | -0.200367 |
| N | 0.719012  | -0.296371 | -1.146940 |
| N | -1.428397 | -0.219364 | -0.835387 |
| C | -1.133467 | -0.622763 | -2.121744 |
| N | 0.139141  | -0.690224 | -2.351518 |
| C | 2.088264  | -0.582201 | -0.961182 |
| C | 4.798094  | -1.210713 | -0.675617 |
| C | 3.046680  | 0.022617  | -1.779389 |
| C | 2.506828  | -1.519178 | -0.011879 |
| C | 3.855270  | -1.820684 | 0.148889  |
| C | 4.394782  | -0.289570 | -1.641539 |
| C | -2.781259 | -0.410306 | -0.268507 |

## Supporting Information I

|   |           |           |           |
|---|-----------|-----------|-----------|
| H | -2.992870 | 0.432204  | 0.387043  |
| C | -2.236366 | -0.822863 | -3.116388 |
| C | -3.841661 | -0.464443 | -1.400491 |
| H | -4.091341 | 0.538354  | -1.773767 |
| O | -1.163245 | 0.636913  | 1.867300  |
| H | -1.744769 | 1.442608  | 1.878263  |
| H | -0.361083 | 3.004633  | 1.314827  |
| F | 1.607007  | -2.130486 | 0.767361  |
| F | 4.243784  | -2.711501 | 1.065685  |
| F | 6.092027  | -1.504527 | -0.537365 |
| F | 5.306603  | 0.297428  | -2.422474 |
| F | 2.675861  | 0.918522  | -2.692539 |
| O | -3.404682 | -1.296172 | -2.480555 |
| H | -1.940781 | -1.560887 | -3.864933 |
| C | -5.015787 | -1.210854 | -0.747689 |
| H | -5.619860 | -1.714169 | -1.509016 |
| H | -5.666741 | -0.500903 | -0.218915 |
| C | -3.015626 | -1.718826 | 0.469615  |
| C | -4.322503 | -2.153739 | 0.215157  |
| C | -2.177609 | -2.424476 | 1.326511  |
| H | -1.166143 | -2.085380 | 1.525031  |
| C | -2.664404 | -3.591148 | 1.924907  |
| H | -2.021608 | -4.161684 | 2.589632  |
| C | -3.969152 | -4.027116 | 1.677716  |
| H | -4.332445 | -4.935966 | 2.150001  |
| C | -4.809234 | -3.308027 | 0.821446  |
| H | -5.820675 | -3.655032 | 0.624377  |
| H | -2.428265 | 0.135520  | -3.628851 |
| O | -3.826930 | 3.470716  | -0.473496 |
| C | -5.082064 | 3.584492  | 0.201571  |
| H | -5.789502 | 3.936039  | -0.551936 |
| H | -5.022052 | 4.302326  | 1.025190  |
| H | -5.405602 | 2.620983  | 0.607946  |

---

# Supporting Information I

TS<sub>major</sub> that gives 3a by the catalysis of 1c

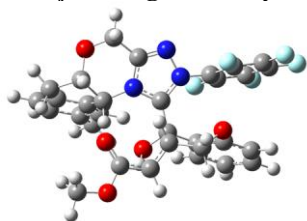

|                                               |                             |
|-----------------------------------------------|-----------------------------|
| Energies (RB3LYP) =                           | -2235.17009109              |
| Zero-point correction =                       | 0.506891 (Hartree/Particle) |
| Thermal correction to Energy =                | 0.543840                    |
| Thermal correction to Enthalpy =              | 0.544784                    |
| Thermal correction to Gibbs Free Energy =     | 0.436924                    |
| Energies (B3LYP-D3) =                         | -2236.03191394              |
| Sum of electronic and zero-point Energies =   | -2235.525023                |
| Sum of electronic and thermal Energies =      | -2235.488074                |
| Sum of electronic and thermal Enthalpies =    | -2235.487130                |
| Sum of electronic and thermal Free Energies = | -2235.594990                |

| Atomic Type | Coordinates (Angstroms) |           |           |
|-------------|-------------------------|-----------|-----------|
|             | X                       | Y         | Z         |
| H           | 0.502998                | -0.453652 | 3.087627  |
| C           | 1.349212                | 0.129493  | 2.739219  |
| C           | 3.493279                | 1.681997  | 1.844757  |
| C           | 1.217907                | 0.856213  | 1.547950  |
| C           | 2.542405                | 0.151120  | 3.459888  |
| C           | 3.619759                | 0.917579  | 3.004320  |
| C           | 2.293889                | 1.653018  | 1.130431  |
| H           | 2.633839                | -0.429119 | 4.373682  |
| H           | 4.551497                | 0.936757  | 3.563259  |
| H           | 4.299649                | 2.315517  | 1.487842  |
| O           | 2.174930                | 2.414535  | -0.007958 |
| C           | 1.046785                | 3.314057  | 0.072982  |
| H           | 1.144297                | 3.902058  | 0.994026  |
| H           | 1.169499                | 3.987961  | -0.779794 |
| C           | -0.321289               | 2.659352  | 0.014462  |
| C           | -1.342098               | 3.274512  | 0.788169  |
| H           | -1.079788               | 3.893632  | 1.641241  |
| C           | -2.697441               | 3.331573  | 0.320485  |
| O           | -3.175278               | 2.727921  | -0.649706 |
| C           | -0.060417               | 0.826667  | 0.755575  |
| C           | -0.121592               | -0.008583 | -0.426446 |
| N           | 0.896622                | -0.427584 | -1.240689 |
| N           | -1.256847               | -0.334977 | -1.131528 |
| C           | -0.857478               | -0.863768 | -2.338608 |
| N           | 0.431992                | -0.950595 | -2.442634 |
| C           | 2.273197                | -0.598931 | -0.963906 |
| C           | 4.991625                | -1.054633 | -0.530730 |
| C           | 2.693526                | -1.550147 | -0.030658 |
| C           | 3.230350                | 0.098764  | -1.704133 |
| C           | 4.586830                | -0.123043 | -1.485260 |
| C           | 4.046138                | -1.766075 | 0.206073  |
| C           | -2.682974               | -0.271164 | -0.745519 |
| H           | -2.855460               | 0.704768  | -0.290249 |
| C           | -1.856461               | -1.159212 | -3.419870 |
| C           | -3.582874               | -0.365677 | -2.004908 |
| H           | -3.628801               | 0.590176  | -2.542040 |
| O           | -1.190958               | 0.664702  | 1.541622  |
| H           | -1.546041               | 1.604804  | 1.645398  |
| H           | -0.631690               | 2.391700  | -0.995496 |
| F           | 1.786923                | -2.247400 | 0.659660  |
| F           | 4.441452                | -2.664989 | 1.111378  |

## Supporting Information I

|   |           |           |           |
|---|-----------|-----------|-----------|
| F | 6.291362  | -1.262768 | -0.317389 |
| F | 5.502587  | 0.551757  | -2.185682 |
| F | 2.854120  | 0.985941  | -2.620546 |
| C | -3.199291 | -1.410706 | 0.119212  |
| C | -4.929477 | -0.836065 | -1.437689 |
| H | -5.507603 | -1.363377 | -2.203102 |
| H | -5.514413 | 0.033878  | -1.110460 |
| C | -4.513736 | -1.704418 | -0.268301 |
| O | -3.132590 | -1.408235 | -2.881088 |
| H | -1.550124 | -2.044324 | -3.982549 |
| C | -2.592733 | -2.091886 | 1.166428  |
| H | -1.578557 | -1.849721 | 1.467603  |
| C | -5.232405 | -2.683552 | 0.407512  |
| H | -6.253150 | -2.923288 | 0.119152  |
| C | -3.301874 | -3.095612 | 1.846428  |
| C | -4.619673 | -3.372215 | 1.459042  |
| H | -5.175371 | -4.144684 | 1.985855  |
| H | -1.877375 | -0.301294 | -4.113878 |
| O | -3.477343 | 4.152715  | 1.092196  |
| C | -4.846498 | 4.242389  | 0.699968  |
| H | -5.338266 | 3.265175  | 0.751105  |
| H | -4.942540 | 4.625453  | -0.320780 |
| H | -5.311072 | 4.932854  | 1.406701  |
| C | -2.642786 | -3.869684 | 2.965498  |
| H | -2.062977 | -3.209888 | 3.620928  |
| H | -1.949420 | -4.626382 | 2.574646  |
| H | -3.382409 | -4.391069 | 3.581692  |
| H | 0.502998  | -0.453652 | 3.087627  |
| C | 1.349212  | 0.129493  | 2.739219  |
| C | 3.493279  | 1.681997  | 1.844757  |
| C | 1.217907  | 0.856213  | 1.547950  |
| C | 2.542405  | 0.151120  | 3.459888  |
| C | 3.619759  | 0.917579  | 3.004320  |
| C | 2.293889  | 1.653018  | 1.130431  |
| H | 2.633839  | -0.429119 | 4.373682  |
| H | 4.551497  | 0.936757  | 3.563259  |
| H | 4.299649  | 2.315517  | 1.487842  |
| O | 2.174930  | 2.414535  | -0.007958 |
| C | 1.046785  | 3.314057  | 0.072982  |
| H | 1.144297  | 3.902058  | 0.994026  |
| H | 1.169499  | 3.987961  | -0.779794 |
| C | -0.321289 | 2.659352  | 0.014462  |
| C | -1.342098 | 3.274512  | 0.788169  |
| H | -1.079788 | 3.893632  | 1.641241  |
| C | -2.697441 | 3.331573  | 0.320485  |
| O | -3.175278 | 2.727921  | -0.649706 |
| C | -0.060417 | 0.826667  | 0.755575  |
| C | -0.121592 | -0.008583 | -0.426446 |
| N | 0.896622  | -0.427584 | -1.240689 |
| N | -1.256847 | -0.334977 | -1.131528 |
| C | -0.857478 | -0.863768 | -2.338608 |
| N | 0.431992  | -0.950595 | -2.442634 |
| C | 2.273197  | -0.598931 | -0.963906 |
| C | 4.991625  | -1.054633 | -0.530730 |
| C | 2.693526  | -1.550147 | -0.030658 |
| C | 3.230350  | 0.098764  | -1.704133 |
| C | 4.586830  | -0.123043 | -1.485260 |
| C | 4.046138  | -1.766075 | 0.206073  |
| C | -2.682974 | -0.271164 | -0.745519 |
| H | -2.855460 | 0.704768  | -0.290249 |
| C | -1.856461 | -1.159212 | -3.419870 |
| C | -3.582874 | -0.365677 | -2.004908 |
| H | -3.628801 | 0.590176  | -2.542040 |

## Supporting Information I

|   |           |           |           |
|---|-----------|-----------|-----------|
| O | -1.190958 | 0.664702  | 1.541622  |
| H | -1.546041 | 1.604804  | 1.645398  |
| H | -0.631690 | 2.391700  | -0.995496 |
| F | 1.786923  | -2.247400 | 0.659660  |
| F | 4.441452  | -2.664989 | 1.111378  |
| F | 6.291362  | -1.262768 | -0.317389 |
| F | 5.502587  | 0.551757  | -2.185682 |
| F | 2.854120  | 0.985941  | -2.620546 |
| C | -3.199291 | -1.410706 | 0.119212  |
| C | -4.929477 | -0.836065 | -1.437689 |
| H | -5.507603 | -1.363377 | -2.203102 |
| H | -5.514413 | 0.033878  | -1.110460 |
| C | -4.513736 | -1.704418 | -0.268301 |
| O | -3.132590 | -1.408235 | -2.881088 |
| H | -1.550124 | -2.044324 | -3.982549 |
| C | -2.592733 | -2.091886 | 1.166428  |
| H | -1.578557 | -1.849721 | 1.467603  |
| C | -5.232405 | -2.683552 | 0.407512  |
| H | -6.253150 | -2.923288 | 0.119152  |
| C | -3.301874 | -3.095612 | 1.846428  |
| C | -4.619673 | -3.372215 | 1.459042  |
| H | -5.175371 | -4.144684 | 1.985855  |
| H | -1.877375 | -0.301294 | -4.113878 |
| O | -3.477343 | 4.152715  | 1.092196  |
| C | -4.846498 | 4.242389  | 0.699968  |
| H | -5.338266 | 3.265175  | 0.751105  |
| H | -4.942540 | 4.625453  | -0.320780 |
| H | -5.311072 | 4.932854  | 1.406701  |
| C | -2.642786 | -3.869684 | 2.965498  |
| H | -2.062977 | -3.209888 | 3.620928  |
| H | -1.949420 | -4.626381 | 2.574646  |
| H | -3.382409 | -4.391069 | 3.581692  |

---

# Supporting Information I

TS<sub>minor</sub> that gives 3a by the catalysis of 1c

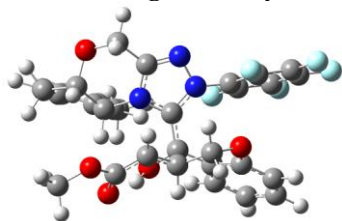

|                                               |                             |
|-----------------------------------------------|-----------------------------|
| Energies (RB3LYP) =                           | -2235.16498172              |
| Zero-point correction =                       | 0.506954 (Hartree/Particle) |
| Thermal correction to Energy =                | 0.544140                    |
| Thermal correction to Enthalpy =              | 0.545084                    |
| Thermal correction to Gibbs Free Energy =     | 0.437042                    |
| Energies (B3LYP-D3) =                         | -2236.02897405              |
| Sum of electronic and zero-point Energies =   | -2235.522020                |
| Sum of electronic and thermal Energies =      | -2235.484834                |
| Sum of electronic and thermal Enthalpies =    | -2235.483890                |
| Sum of electronic and thermal Free Energies = | -2235.591932                |

| Atomic Type | Coordinates (Angstroms) |           |           |
|-------------|-------------------------|-----------|-----------|
|             | X                       | Y         | Z         |
| H           | -0.590653               | 0.757386  | 3.249298  |
| C           | -1.426153               | 0.140012  | 2.937252  |
| C           | -3.526403               | -1.518226 | 2.149401  |
| C           | -1.263882               | -0.676869 | 1.808445  |
| C           | -2.627239               | 0.158758  | 3.642061  |
| C           | -3.682411               | -0.666543 | 3.240397  |
| C           | -2.318588               | -1.531041 | 1.444521  |
| H           | -2.739972               | 0.810729  | 4.503524  |
| H           | -4.621444               | -0.659772 | 3.787307  |
| H           | -4.319183               | -2.188547 | 1.831756  |
| O           | -2.240800               | -2.335009 | 0.338853  |
| C           | -1.061052               | -3.136117 | 0.114771  |
| H           | -0.955295               | -3.168230 | -0.973105 |
| H           | -1.290094               | -4.152588 | 0.462293  |
| C           | 0.231382                | -2.690277 | 0.764250  |
| C           | 1.411535                | -3.101258 | 0.105619  |
| H           | 1.383784                | -3.474868 | -0.912782 |
| C           | 2.652881                | -3.094947 | 0.793297  |
| O           | 2.887757                | -2.518345 | 1.878085  |
| C           | 0.044763                | -0.735738 | 1.085860  |
| C           | 0.189468                | -0.204366 | -0.237522 |
| N           | -0.758716               | -0.052872 | -1.225068 |
| N           | 1.388753                | -0.139457 | -0.916528 |
| C           | 1.090551                | -0.003273 | -2.257188 |
| N           | -0.181915               | 0.059579  | -2.488836 |
| C           | -2.114974               | 0.312817  | -1.093868 |
| C           | -4.800314               | 1.075288  | -0.920761 |
| C           | -3.103953               | -0.415684 | -1.761194 |
| C           | -2.490732               | 1.439276  | -0.356053 |
| C           | -3.826797               | 1.811036  | -0.248709 |
| C           | -4.439753               | -0.037873 | -1.679088 |
| C           | 2.751923                | 0.133735  | -0.410024 |
| H           | 2.951917                | -0.557944 | 0.406525  |
| C           | 2.187524                | -0.054631 | -3.276211 |
| C           | 3.803548                | -0.074492 | -1.533527 |
| H           | 4.032203                | -1.138217 | -1.687307 |
| O           | 1.130689                | -0.419939 | 1.907659  |
| H           | 1.689373                | -1.226396 | 2.065239  |
| H           | 0.245854                | -2.815184 | 1.848976  |
| F           | -1.561327               | 2.170906  | 0.270415  |
| F           | -4.173927               | 2.884523  | 0.467144  |

## Supporting Information I

|   |           |           |           |
|---|-----------|-----------|-----------|
| F | -6.082485 | 1.433660  | -0.834459 |
| F | -5.380552 | -0.743901 | -2.313367 |
| F | -2.775025 | -1.493608 | -2.471257 |
| O | 3.372797  | 0.516540  | -2.764481 |
| H | 1.902430  | 0.508323  | -4.167384 |
| C | 4.997823  | 0.769009  | -1.058824 |
| H | 5.603333  | 1.087844  | -1.913131 |
| H | 5.640449  | 0.171590  | -0.397225 |
| C | 3.019580  | 1.562401  | 0.035603  |
| C | 4.331044  | 1.906165  | -0.311967 |
| C | 2.199994  | 2.448019  | 0.724310  |
| H | 1.182988  | 2.172218  | 0.987053  |
| C | 2.690289  | 3.715700  | 1.073802  |
| C | 4.006175  | 4.050795  | 0.722546  |
| H | 4.389165  | 5.034737  | 0.984089  |
| C | 4.832101  | 3.155977  | 0.036339  |
| H | 5.844666  | 3.445612  | -0.234360 |
| H | 2.351181  | -1.106891 | -3.565887 |
| O | 3.651808  | -3.763243 | 0.141216  |
| C | 4.918977  | -3.779692 | 0.802815  |
| H | 5.592203  | -4.318662 | 0.133388  |
| H | 4.853607  | -4.294539 | 1.765948  |
| H | 5.290058  | -2.765005 | 0.979207  |
| C | 1.821157  | 4.688131  | 1.838137  |
| H | 0.762108  | 4.555920  | 1.592282  |
| H | 2.092800  | 5.726702  | 1.621232  |
| H | 1.922742  | 4.544214  | 2.922175  |
| H | -0.590653 | 0.757386  | 3.249298  |
| C | -1.426153 | 0.140012  | 2.937252  |
| C | -3.526403 | -1.518226 | 2.149401  |
| C | -1.263882 | -0.676869 | 1.808445  |
| C | -2.627239 | 0.158758  | 3.642061  |
| C | -3.682411 | -0.666543 | 3.240397  |
| C | -2.318588 | -1.531041 | 1.444521  |
| H | -2.739972 | 0.810729  | 4.503524  |
| H | -4.621444 | -0.659772 | 3.787307  |
| H | -4.319183 | -2.188547 | 1.831756  |
| O | -2.240800 | -2.335009 | 0.338853  |
| C | -1.061052 | -3.136117 | 0.114771  |
| H | -0.955295 | -3.168230 | -0.973105 |
| H | -1.290094 | -4.152588 | 0.462293  |
| C | 0.231382  | -2.690277 | 0.764250  |
| C | 1.411535  | -3.101258 | 0.105619  |
| H | 1.383784  | -3.474868 | -0.912782 |
| C | 2.652881  | -3.094947 | 0.793297  |
| O | 2.887757  | -2.518345 | 1.878085  |
| C | 0.044763  | -0.735738 | 1.085860  |
| C | 0.189468  | -0.204366 | -0.237522 |
| N | -0.758716 | -0.052872 | -1.225068 |
| N | 1.388753  | -0.139457 | -0.916528 |
| C | 1.090551  | -0.003273 | -2.257188 |
| N | -0.181915 | 0.059579  | -2.488836 |
| C | -2.114974 | 0.312817  | -1.093868 |
| C | -4.800314 | 1.075288  | -0.920761 |
| C | -3.103953 | -0.415684 | -1.761194 |
| C | -2.490732 | 1.439276  | -0.356053 |
| C | -3.826797 | 1.811036  | -0.248709 |
| C | -4.439753 | -0.037873 | -1.679088 |
| C | 2.751923  | 0.133735  | -0.410024 |
| H | 2.951917  | -0.557944 | 0.406525  |
| C | 2.187524  | -0.054631 | -3.276211 |
| C | 3.803548  | -0.074492 | -1.533527 |
| H | 4.032203  | -1.138217 | -1.687307 |

## Supporting Information I

|   |           |           |           |
|---|-----------|-----------|-----------|
| O | 1.130689  | -0.419939 | 1.907659  |
| H | 1.689373  | -1.226396 | 2.065239  |
| H | 0.245854  | -2.815184 | 1.848976  |
| F | -1.561327 | 2.170906  | 0.270415  |
| F | -4.173927 | 2.884523  | 0.467144  |
| F | -6.082485 | 1.433660  | -0.834459 |
| F | -5.380552 | -0.743901 | -2.313367 |
| F | -2.775025 | -1.493608 | -2.471257 |
| O | 3.372797  | 0.516540  | -2.764481 |
| H | 1.902430  | 0.508323  | -4.167384 |
| C | 4.997823  | 0.769009  | -1.058824 |
| H | 5.603333  | 1.087844  | -1.913131 |
| H | 5.640449  | 0.171590  | -0.397225 |
| C | 3.019580  | 1.562401  | 0.035603  |
| C | 4.331044  | 1.906165  | -0.311967 |
| C | 2.199994  | 2.448019  | 0.724310  |
| H | 1.182988  | 2.172218  | 0.987053  |
| C | 2.690289  | 3.715700  | 1.073802  |
| C | 4.006175  | 4.050795  | 0.722546  |
| H | 4.389165  | 5.034737  | 0.984089  |
| C | 4.832101  | 3.155977  | 0.036339  |
| H | 5.844666  | 3.445612  | -0.234360 |
| H | 2.351181  | -1.106891 | -3.565887 |
| O | 3.651808  | -3.763243 | 0.141216  |
| C | 4.918977  | -3.779692 | 0.802815  |
| H | 5.592203  | -4.318662 | 0.133388  |
| H | 4.853607  | -4.294539 | 1.765948  |
| H | 5.290058  | -2.765005 | 0.979207  |
| C | 1.821157  | 4.688131  | 1.838137  |
| H | 0.762108  | 4.555920  | 1.592282  |
| H | 2.092800  | 5.726702  | 1.621232  |
| H | 1.922742  | 4.544214  | 2.922174  |

---



# Supporting Information I

TS<sub>major</sub> that gives 3a by the catalysis of 1d

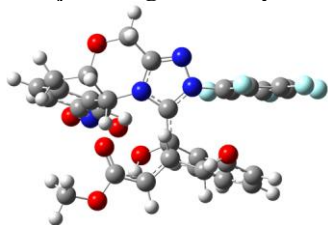

|                                               |                             |
|-----------------------------------------------|-----------------------------|
| Energies (RB3LYP) =                           | -2400.35478873              |
| Zero-point correction =                       | 0.481955 (Hartree/Particle) |
| Thermal correction to Energy =                | 0.519600                    |
| Thermal correction to Enthalpy =              | 0.520544                    |
| Thermal correction to Gibbs Free Energy =     | 0.410789                    |
| Energies (B3LYP-D3) =                         | -2401.28033558              |
| Sum of electronic and zero-point Energies =   | -2400.798381                |
| Sum of electronic and thermal Energies =      | -2400.760736                |
| Sum of electronic and thermal Enthalpies =    | -2400.759791                |
| Sum of electronic and thermal Free Energies = | -2400.869546                |

| Atomic Type | Coordinates (Angstroms) |           |           |
|-------------|-------------------------|-----------|-----------|
|             | X                       | Y         | Z         |
| H           | 0.347398                | 1.426990  | -2.603060 |
| C           | 1.261427                | 0.844857  | -2.539579 |
| C           | 3.597727                | -0.683355 | -2.390701 |
| C           | 1.292498                | -0.281975 | -1.705430 |
| C           | 2.388426                | 1.220194  | -3.269238 |
| C           | 3.560506                | 0.462177  | -3.185160 |
| C           | 2.464398                | -1.051200 | -1.663265 |
| H           | 2.353864                | 2.104525  | -3.898806 |
| H           | 4.440573                | 0.752950  | -3.752437 |
| H           | 4.483090                | -1.309128 | -2.331641 |
| O           | 2.514026                | -2.180383 | -0.878922 |
| C           | 1.466923                | -3.113459 | -1.216202 |
| H           | 1.518496                | -3.313706 | -2.293683 |
| H           | 1.731083                | -4.031337 | -0.682738 |
| C           | 0.061572                | -2.688542 | -0.833124 |
| C           | -0.975098               | -3.114524 | -1.704873 |
| H           | -0.744480               | -3.381750 | -2.732107 |
| C           | -2.272393               | -3.470599 | -1.206657 |
| O           | -2.712712               | -3.265874 | -0.065904 |
| C           | 0.086917                | -0.682386 | -0.899802 |
| C           | 0.038143                | -0.310864 | 0.496884  |
| N           | 1.066456                | -0.083838 | 1.371377  |
| N           | -1.075040               | -0.342873 | 1.308204  |
| C           | -0.645923               | -0.190697 | 2.608881  |
| N           | 0.635781                | -0.020810 | 2.691574  |
| C           | 2.419214                | 0.256459  | 1.129577  |
| C           | 5.089432                | 0.994172  | 0.816585  |
| C           | 2.750530                | 1.507316  | 0.602798  |
| C           | 3.439082                | -0.609070 | 1.530521  |
| C           | 4.772464                | -0.245913 | 1.369003  |
| C           | 4.080157                | 1.872331  | 0.424244  |
| C           | -2.506101               | -0.449193 | 0.969108  |
| H           | -2.616884               | -1.259766 | 0.246116  |
| C           | -1.597909               | -0.337542 | 3.760486  |
| C           | -3.328739               | -0.833676 | 2.226563  |
| H           | -3.252709               | -1.906289 | 2.444279  |
| O           | -1.117302               | -0.404281 | -1.530583 |
| H           | -1.387044               | -1.289608 | -1.935111 |
| H           | -0.160490               | -2.816931 | 0.226141  |
| F           | 1.781934                | 2.353192  | 0.246753  |
| F           | 4.393516                | 3.061410  | -0.095077 |

## Supporting Information I

|   |           |           |           |
|---|-----------|-----------|-----------|
| F | 6.366873  | 1.340804  | 0.657699  |
| F | 5.748692  | -1.077447 | 1.742641  |
| F | 3.142835  | -1.790385 | 2.065716  |
| C | -3.188870 | 0.826266  | 0.504347  |
| C | -4.747800 | -0.363983 | 1.876651  |
| H | -5.324135 | -0.153376 | 2.782578  |
| H | -5.270669 | -1.149537 | 1.315448  |
| C | -4.497771 | 0.850770  | 1.009751  |
| O | -2.921473 | -0.060995 | 3.361254  |
| H | -1.335181 | 0.362125  | 4.557230  |
| C | -2.721220 | 1.843753  | -0.314161 |
| H | -1.724318 | 1.845186  | -0.730560 |
| C | -5.362264 | 1.897050  | 0.692895  |
| H | -6.374915 | 1.920369  | 1.085618  |
| C | -3.600561 | 2.887168  | -0.608470 |
| C | -4.908777 | 2.931599  | -0.125054 |
| H | -5.543324 | 3.768327  | -0.389254 |
| H | -1.510665 | -1.362362 | 4.159184  |
| O | -3.043232 | -4.081941 | -2.158345 |
| C | -4.358624 | -4.448446 | -1.743159 |
| H | -4.941997 | -3.568456 | -1.451642 |
| H | -4.328475 | -5.140974 | -0.896350 |
| H | -4.817067 | -4.930592 | -2.608607 |
| N | -3.126121 | 3.981749  | -1.469544 |
| O | -1.968118 | 3.924544  | -1.884888 |
| O | -3.913503 | 4.893112  | -1.725360 |
| H | 0.347398  | 1.426990  | -2.603060 |
| C | 1.261427  | 0.844857  | -2.539579 |
| C | 3.597727  | -0.683355 | -2.390701 |
| C | 1.292498  | -0.281975 | -1.705430 |
| C | 2.388426  | 1.220194  | -3.269238 |
| C | 3.560506  | 0.462177  | -3.185160 |
| C | 2.464398  | -1.051200 | -1.663265 |
| H | 2.353864  | 2.104525  | -3.898806 |
| H | 4.440573  | 0.752950  | -3.752437 |
| H | 4.483090  | -1.309128 | -2.331641 |
| O | 2.514026  | -2.180383 | -0.878922 |
| C | 1.466923  | -3.113459 | -1.216202 |
| H | 1.518496  | -3.313706 | -2.293683 |
| H | 1.731083  | -4.031337 | -0.682738 |
| C | 0.061572  | -2.688542 | -0.833124 |
| C | -0.975098 | -3.114524 | -1.704873 |
| H | -0.744480 | -3.381750 | -2.732107 |
| C | -2.272393 | -3.470599 | -1.206657 |
| O | -2.712712 | -3.265874 | -0.065904 |
| C | 0.086917  | -0.682386 | -0.899802 |
| C | 0.038143  | -0.310864 | 0.496884  |
| N | 1.066456  | -0.083838 | 1.371377  |
| N | -1.075040 | -0.342873 | 1.308204  |
| C | -0.645923 | -0.190697 | 2.608881  |
| N | 0.635781  | -0.020810 | 2.691574  |
| C | 2.419214  | 0.256459  | 1.129577  |
| C | 5.089432  | 0.994172  | 0.816585  |
| C | 2.750530  | 1.507316  | 0.602798  |
| C | 3.439082  | -0.609070 | 1.530521  |
| C | 4.772464  | -0.245913 | 1.369003  |
| C | 4.080157  | 1.872331  | 0.424244  |
| C | -2.506101 | -0.449193 | 0.969108  |
| H | -2.616884 | -1.259766 | 0.246116  |
| C | -1.597909 | -0.337542 | 3.760486  |
| C | -3.328739 | -0.833676 | 2.226563  |
| H | -3.252709 | -1.906289 | 2.444279  |
| O | -1.117302 | -0.404281 | -1.530583 |

## Supporting Information I

|   |           |           |           |
|---|-----------|-----------|-----------|
| H | -1.387044 | -1.289608 | -1.935111 |
| H | -0.160490 | -2.816931 | 0.226141  |
| F | 1.781934  | 2.353192  | 0.246753  |
| F | 4.393516  | 3.061410  | -0.095077 |
| F | 6.366873  | 1.340804  | 0.657699  |
| F | 5.748692  | -1.077447 | 1.742641  |
| F | 3.142835  | -1.790385 | 2.065716  |
| C | -3.188870 | 0.826266  | 0.504347  |
| C | -4.747800 | -0.363983 | 1.876651  |
| H | -5.324135 | -0.153376 | 2.782578  |
| H | -5.270669 | -1.149537 | 1.315448  |
| C | -4.497771 | 0.850770  | 1.009751  |
| O | -2.921473 | -0.060995 | 3.361254  |
| H | -1.335181 | 0.362125  | 4.557230  |
| C | -2.721220 | 1.843753  | -0.314161 |
| H | -1.724318 | 1.845186  | -0.730560 |
| C | -5.362264 | 1.897050  | 0.692895  |
| H | -6.374915 | 1.920369  | 1.085618  |
| C | -3.600561 | 2.887168  | -0.608470 |
| C | -4.908777 | 2.931599  | -0.125054 |
| H | -5.543324 | 3.768327  | -0.389254 |
| H | -1.510665 | -1.362362 | 4.159184  |
| O | -3.043232 | -4.081941 | -2.158345 |
| C | -4.358624 | -4.448446 | -1.743159 |
| H | -4.941997 | -3.568456 | -1.451642 |
| H | -4.328475 | -5.140974 | -0.896350 |
| H | -4.817067 | -4.930592 | -2.608607 |
| N | -3.126121 | 3.981749  | -1.469544 |
| O | -1.968118 | 3.924544  | -1.884888 |
| O | -3.913503 | 4.893112  | -1.725360 |

---

# Supporting Information I

TS<sub>minor</sub> that gives 3a by the catalysis of 1d

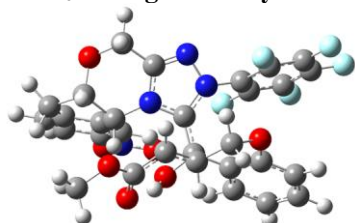

|                                               |                             |
|-----------------------------------------------|-----------------------------|
| Energies (RB3LYP) =                           | -2400.34808555              |
| Zero-point correction =                       | 0.481783 (Hartree/Particle) |
| Thermal correction to Energy =                | 0.519761                    |
| Thermal correction to Enthalpy =              | 0.520706                    |
| Thermal correction to Gibbs Free Energy =     | 0.410041                    |
| Energies (B3LYP-D3) =                         | -2401.27562592              |
| Sum of electronic and zero-point Energies =   | -2400.793842                |
| Sum of electronic and thermal Energies =      | -2400.755865                |
| Sum of electronic and thermal Enthalpies =    | -2400.754920                |
| Sum of electronic and thermal Free Energies = | -2400.865584                |

| Atomic Type | Coordinates (Angstroms) |           |           |
|-------------|-------------------------|-----------|-----------|
|             | X                       | Y         | Z         |
| H           | -0.500261               | 1.273567  | 2.929991  |
| C           | -1.389093               | 0.668444  | 2.787148  |
| C           | -3.643902               | -0.937251 | 2.434071  |
| C           | -1.339859               | -0.385761 | 1.862544  |
| C           | -2.553676               | 0.940254  | 3.500698  |
| C           | -3.685037               | 0.138868  | 3.317327  |
| C           | -2.473037               | -1.203507 | 1.717545  |
| H           | -2.579102               | 1.772878  | 4.197475  |
| H           | -4.596219               | 0.343507  | 3.872983  |
| H           | -4.500353               | -1.588353 | 2.288543  |
| O           | -2.510207               | -2.225287 | 0.805433  |
| C           | -1.411996               | -3.155337 | 0.718848  |
| H           | -1.361066               | -3.421810 | -0.340576 |
| H           | -1.702410               | -4.054214 | 1.279622  |
| C           | -0.057716               | -2.701619 | 1.219479  |
| C           | 1.051385                | -3.344372 | 0.626860  |
| H           | 0.940565                | -3.923583 | -0.284177 |
| C           | 2.321803                | -3.309359 | 1.257568  |
| O           | 2.661742                | -2.536145 | 2.180717  |
| C           | -0.073540               | -0.707497 | 1.134298  |
| C           | 0.059541                | -0.467041 | -0.270100 |
| N           | -0.906467               | -0.426498 | -1.249801 |
| N           | 1.237084                | -0.631231 | -0.973991 |
| C           | 0.904553                | -0.715561 | -2.311714 |
| N           | -0.366274               | -0.592445 | -2.522988 |
| C           | -2.229251               | 0.060694  | -1.163717 |
| C           | -4.841740               | 1.047558  | -1.095029 |
| C           | -3.290436               | -0.712081 | -1.642455 |
| C           | -2.492498               | 1.341474  | -0.669229 |
| C           | -3.794042               | 1.830092  | -0.613519 |
| C           | -4.591717               | -0.223312 | -1.611721 |
| C           | 2.632577                | -0.418666 | -0.545220 |
| H           | 2.799834                | -0.981674 | 0.371596  |
| C           | 1.958318                | -1.027239 | -3.329916 |
| C           | 3.620289                | -0.907121 | -1.639436 |
| H           | 3.742877                | -1.998561 | -1.618386 |
| O           | 1.072416                | -0.332006 | 1.844801  |
| H           | 1.565206                | -1.136726 | 2.155651  |
| H           | -0.001698               | -2.595107 | 2.304727  |
| F           | -1.488352               | 2.106989  | -0.231143 |
| F           | -4.038468               | 3.050562  | -0.131388 |

## Supporting Information I

|   |           |           |           |
|---|-----------|-----------|-----------|
| F | -6.090558 | 1.514223  | -1.057976 |
| F | -5.603663 | -0.969280 | -2.064518 |
| F | -3.063131 | -1.934448 | -2.121470 |
| O | 3.203190  | -0.481619 | -2.938699 |
| H | 1.692456  | -0.592167 | -4.295283 |
| C | 4.905445  | -0.120997 | -1.333837 |
| H | 5.509544  | -0.001352 | -2.238240 |
| H | 5.512286  | -0.658354 | -0.592493 |
| C | 3.055355  | 1.027267  | -0.339509 |
| C | 4.382041  | 1.180979  | -0.766618 |
| C | 2.355179  | 2.082098  | 0.227596  |
| H | 1.333531  | 1.990848  | 0.571371  |
| C | 3.024029  | 3.302061  | 0.343361  |
| C | 4.344114  | 3.482220  | -0.071571 |
| H | 4.806509  | 4.454476  | 0.044638  |
| C | 5.032371  | 2.406068  | -0.631377 |
| H | 6.058427  | 2.532895  | -0.965036 |
| H | 2.031039  | -2.121577 | -3.447882 |
| O | 3.225253  | -4.193376 | 0.736309  |
| C | 4.511859  | -4.203843 | 1.359593  |
| H | 5.101787  | -4.933849 | 0.802164  |
| H | 4.437723  | -4.502145 | 2.409542  |
| H | 4.985682  | -3.217896 | 1.315144  |
| N | 2.305819  | 4.444772  | 0.930985  |
| O | 1.142406  | 4.265513  | 1.290098  |
| O | 2.910469  | 5.512856  | 1.028320  |
| H | -0.500261 | 1.273567  | 2.929991  |
| C | -1.389093 | 0.668444  | 2.787148  |
| C | -3.643902 | -0.937251 | 2.434071  |
| C | -1.339859 | -0.385761 | 1.862544  |
| C | -2.553676 | 0.940254  | 3.500698  |
| C | -3.685037 | 0.138868  | 3.317327  |
| C | -2.473037 | -1.203507 | 1.717545  |
| H | -2.579102 | 1.772878  | 4.197475  |
| H | -4.596219 | 0.343507  | 3.872983  |
| H | -4.500353 | -1.588353 | 2.288543  |
| O | -2.510207 | -2.225287 | 0.805433  |
| C | -1.411996 | -3.155337 | 0.718848  |
| H | -1.361066 | -3.421810 | -0.340576 |
| H | -1.702410 | -4.054214 | 1.279622  |
| C | -0.057716 | -2.701619 | 1.219479  |
| C | 1.051385  | -3.344372 | 0.626860  |
| H | 0.940565  | -3.923583 | -0.284177 |
| C | 2.321803  | -3.309359 | 1.257568  |
| O | 2.661742  | -2.536145 | 2.180717  |
| C | -0.073540 | -0.707497 | 1.134298  |
| C | 0.059541  | -0.467041 | -0.270100 |
| N | -0.906467 | -0.426498 | -1.249801 |
| N | 1.237084  | -0.631231 | -0.973991 |
| C | 0.904553  | -0.715561 | -2.311714 |
| N | -0.366274 | -0.592445 | -2.522988 |
| C | -2.229251 | 0.060694  | -1.163717 |
| C | -4.841740 | 1.047558  | -1.095029 |
| C | -3.290436 | -0.712081 | -1.642455 |
| C | -2.492498 | 1.341474  | -0.669229 |
| C | -3.794042 | 1.830092  | -0.613519 |
| C | -4.591717 | -0.223312 | -1.611721 |
| C | 2.632577  | -0.418666 | -0.545220 |
| H | 2.799834  | -0.981674 | 0.371596  |
| C | 1.958318  | -1.027239 | -3.329916 |
| C | 3.620289  | -0.907121 | -1.639436 |
| H | 3.742877  | -1.998561 | -1.618386 |
| O | 1.072416  | -0.332006 | 1.844801  |

## Supporting Information I

|   |           |           |           |
|---|-----------|-----------|-----------|
| H | 1.565206  | -1.136726 | 2.155651  |
| H | -0.001698 | -2.595107 | 2.304727  |
| F | -1.488352 | 2.106989  | -0.231143 |
| F | -4.038468 | 3.050562  | -0.131388 |
| F | -6.090558 | 1.514223  | -1.057976 |
| F | -5.603663 | -0.969280 | -2.064518 |
| F | -3.063131 | -1.934448 | -2.121470 |
| O | 3.203190  | -0.481619 | -2.938699 |
| H | 1.692456  | -0.592167 | -4.295283 |
| C | 4.905445  | -0.120997 | -1.333837 |
| H | 5.509544  | -0.001352 | -2.238240 |
| H | 5.512286  | -0.658354 | -0.592493 |
| C | 3.055355  | 1.027267  | -0.339509 |
| C | 4.382041  | 1.180979  | -0.766618 |
| C | 2.355179  | 2.082098  | 0.227596  |
| H | 1.333531  | 1.990848  | 0.571371  |
| C | 3.024029  | 3.302061  | 0.343361  |
| C | 4.344114  | 3.482220  | -0.071571 |
| H | 4.806509  | 4.454476  | 0.044638  |
| C | 5.032371  | 2.406068  | -0.631377 |
| H | 6.058427  | 2.532895  | -0.965036 |
| H | 2.031039  | -2.121577 | -3.447882 |
| O | 3.225253  | -4.193376 | 0.736309  |
| C | 4.511859  | -4.203843 | 1.359593  |
| H | 5.101787  | -4.933849 | 0.802164  |
| H | 4.437723  | -4.502145 | 2.409542  |
| H | 4.985682  | -3.217896 | 1.315144  |
| N | 2.305819  | 4.444772  | 0.930985  |
| O | 1.142406  | 4.265513  | 1.290098  |
| O | 2.910469  | 5.512856  | 1.028320  |

---

## Supporting Information I

### 9. References

1. Kerr, M. S.; Read de Alaniz, J.; Rovis, T. An Efficient Synthesis of Achiral and Chiral 1,2,4-Triazolium Salts: Bench Stable Precursors for N-Heterocyclic Carbenes. *J. Org. Chem.* **2005**, *70*, 5725–5728.
2. Carmine, G. D.; Ragno, D.; Bortolini, O.; Giovannini, P. P.; Mazzanti, A.; Massi, A.; Fogagnolo, M. Enantioselective Dearomatization of Alkylpyridiniums by N-Heterocyclic Carbene-Catalyzed Nucleophilic Acylation. *J. Org. Chem.* **2018**, *83*, 2050–2057.
3. Wang, Y.; Yamauchi, A.; Hashimoto, K.; Fujiwara, T.; Inokuma, T.; Mitani, Y.; Ute, K.; Kuwano, S.; Yamaoka, Y.; Takasu, K.; Yamada, K. Enhanced Molecular Recognition through Substrate–Additive Complex Formation in N-Heterocyclic-Carbene-Catalyzed Kinetic Resolution of  $\alpha$ -Hydroxythioamides. *ACS Catal.* **2022**, *12*, 6100–6107.
4. Pospíšil, J.; Potáček, M. Microwave-assisted solvent-free intramolecular 1,3-dipolar cycloaddition reactions leading to hexahydrochromeno[4,3-b]-pyrroles: scope and limitations. *Tetrahedron* **2007**, *63*, 337–346.
5. Cui, S-L.; Wang, J.; Lin, X-F.; Wang, Y-G. Domino Reaction of 3-(2-Formylphenoxy)propenoates and Amines: A Novel Synthesis of 1,4-Dihydropyridines from Salicylaldehydes, Ethyl Propiolate, and Amines. *J. Org. Chem.* **2007**, *72*, 7779–7782.
6. Heieh, S-Y.; Binanzer, M.; Kreituss, I.; Bode, J. W. Expanded substrate scope and catalyst optimization for the catalytic kinetic resolution of N-heterocycles. *Chem. Commun.* **2012**, *48*, 8892–8894.
7. Kuwano, S.; Harada, S.; Kang, B.; Oriez, R.; Yamaoka, Y.; Takasu, K.; Yamada, K. Enhanced Rate and Selectivity by Carboxylate Salt as a Basic Cocatalyst in Chiral N-Heterocyclic Carbene-Catalyzed Asymmetric Acylation of Secondary Alcohols. *J. Am. Chem. Soc.* **2013**, *135*, 11485–11488.
8. Lee, Y-T.; Jang, Y-J.; Syu, S-e.; Chou, S-C.; Lee, C-J.; Lin, W. Preparation of functional benzofurans and indoles via chemoselective intramolecular Wittig reactions. *Chem. Commun.* **2012**, *48*, 8135–8137.
9. Xiong, Z.; Tian, J.; Xue, P.; Zhang, X.; Lv, H. Enantioselective synthesis of chiral multicyclic  $\gamma$ -lactones via dynamic kinetic resolution of racemic  $\gamma$ -keto carboxylic acids. *Org. Chem. Front.* **2020**, *7*, 104–108.
10. Santoso, H.; Casana, M. I.; Donner, C. D. Exploring O-stannyl ketyl and acyl radical cyclizations for the synthesis of  $\gamma$ -lactone-fused benzopyrans and benzofurans. *Org. Biomol. Chem.* **2014**, *12*, 171–176.
11. Frisch, M. J.; Trucks, G. W.; Schlegel, H. B.; Scuseria, G. E.; Robb, M. A.; Cheeseman, J. R.; Scalmani, G.; Barone, V.; Petersson, G. A.; Nakatsuji, H.; Li, X.; Caricato, M.; Marenich, A.; Bloino, J.; Janesko, B. G.; Gomperts, R.; Mennucci, B.; Hratchian, H. P.; Ortiz, J. V.; Izmaylov, A. F.; Sonnenberg, J. L.; Williams-Young, D.; Ding, F.; Lipparini, F.; Egidi, F.; Goings, J.; Peng, B.; Petrone, A.; Henderson, T.; Ranasinghe, D.; Zakrzewski, V. G.; Gao, J.; Rega, N.; Zheng, G.; Liang, W.; Hada, M.; Ehara, M.; Toyota, K.; Fukuda, R.; Hasegawa, J.; Ishida, M.; Nakajima, T.; Honda, Y.; Kitao, O.; Nakai, H.; Vreven, T.; Throssell, K.; Montgomery, Jr., J. A.; Peralta, J. E.; Ogliaro, F.; Bearpark, M.; Heyd, J. J.; Brothers, E.; Kudin, K. N.; Staroverov, V. N.; Keith, T.; Kobayashi, R.; Normand, J.; Raghavachari, K.; Rendell, A.; Burant, J. C.; Iyengar, S. S.; Tomasi, J.; Cossi, M.; Millam, J. M.; Klene, M.; Adamo, C.; Cammi, R.; Ochterski, J. W.; Martin, R. L.; Morokuma, K.; Farkas, O.; Foresman, J. B.; Fox, D. J. Gaussian, Inc., Wallingford CT, **2016**.
12. Johnson, E. R.; Keinan, S.; Mori-Sánchez, P.; Contreras-García, J.; Cohen, A. J.; Yang, W. Revealing Noncovalent Interactions. *J. Am. Chem. Soc.* **2010**, *132*, 6498.
